# Supplementary material for: Vicia faba SV channel VfTPC1 is a hyperexcitable variant of plant vacuole Two Pore Channels
Source: eLife. 2023 Nov 22;12:e86384. doi: 10.7554/eLife.86384 (PMC10665017; doi:10.7554/eLife.86384)
Supplement: Appendix 1—figure 1—source data 1. [file elife-86384-app1-fig1-data1.xlsx]

## Sheet: Appendix Fig 1
Appendix figure 1 (single experiment)
LjTPC1 steady state current (pA/pF)					LjTPC1 G/Gmax
	0 mM Ca	50 mM Ca				0 mM Ca	50 mM Ca		V1 values (mv)
Voltage (mV)	Exp 1	Exp 1			Voltage (mV)	Exp 1	Exp 1		0 mM Ca	50 mM Ca
-80	-10.0259	-19.1375			-80	0.00116993	7.09394e-05		-3.55723	120.795
-70	-8.36333	-14.1461			-70	0.00100848	0.000315659
-60	-6.49026	-10.6609			-60	5.81533e-05	0.000485741
-50	-5.282	-8.03747			-50	-0.000116307	0.000529665		V2 values (mV)
-40	-4.79651	-6.11151			-40	5.81533e-05	0.000432901		0 mM Ca	50 mM Ca
-30	-4.05507	-4.60353			-30	0.000503515	0.000345382		21.0793	92.18
-20	-3.52431	-3.47053			-20	0.00286036	0.00011057
-10	-3.86649	-2.60949			-10	0.0173558	-3.57336e-05
0	-4.98454	-1.95779			0	0.0909619	-0.000129196
10	-1.7133	-1.3604			10	0.265309	-7.66856e-05
20	19.4638	-0.763689			20	0.520421	0.000131046
30	67.1517	-0.0900284			30	0.705853	0.000914084
40	126.159	0.948181			40	0.807132	0.00213174
50	191.444	2.76726			50	0.868177	0.00471666
60	256.909	7.30317			60	0.90594	0.0152059
70	321.026	22.0927			70	0.930918	0.0454413
80	386.105	53.3381			80	0.949288	0.10713
90	448.188	114.193			90	0.96247	0.214574
100	511.727	194.819			100	0.974073	0.326633
110	576.673	284.46			110	0.986524	0.416138
