# Supplementary material for: Vicia faba SV channel VfTPC1 is a hyperexcitable variant of plant vacuole Two Pore Channels
Source: eLife journal article supplement (doi:10.7554/elife.86384), 2023-10-13
Supplement: fig12-data1 [file elife-86384-fig12-data1-v1.pdf]

**Figure 12—source data 1. TPC1-dependent lifetime of the post-stimulus depolarization phase.**

| Current stimulus (pA) | VfTPC1 $t_{\text{plateau}}$ (s)           | AtTPC1-triple mutant E457/E605A/D606N $t_{\text{plateau}}$ (s) |        |        |        |        |                                   |
|-----------------------|-------------------------------------------|----------------------------------------------------------------|--------|--------|--------|--------|-----------------------------------|
|                       | Exp. 1-6                                  | Exp. 1-3                                                       | Exp. 4 | Exp. 5 | Exp. 6 |        |                                   |
| 10                    | > 10.0                                    | > 10.0                                                         | 0.28   | 0.48   | 0.04   |        |                                   |
| 30                    | > 10.0                                    | > 10.0                                                         | > 10.0 | 0.59   | 0.04   |        |                                   |
| 70                    | > 10.0                                    | > 10.0                                                         | > 10.0 | > 10.0 | 0.09   |        |                                   |
| 150                   | > 10.0                                    | > 10.0                                                         | > 10.0 | > 10.0 | 0.23   |        |                                   |
| 300                   | > 10.0                                    | > 10.0                                                         | > 10.0 | > 10.0 | 0.40   |        |                                   |
| 500                   | > 10.0                                    | > 10.0                                                         | > 10.0 | > 10.0 | 2.70   |        |                                   |
| 1000                  | > 10.0                                    | > 10.0                                                         | > 10.0 | > 10.0 | > 10.0 |        |                                   |
| Current stimulus (pA) | AtTPC1 wild type $t_{\text{plateau}}$ (s) |                                                                |        |        |        |        |                                   |
|                       | Exp. 1                                    | Exp. 2                                                         | Exp. 3 | Exp. 4 | Exp. 5 | Exp. 6 | mean $\pm$ SE (n = 6)             |
| 10                    | 0.05                                      | 0.05                                                           | 0.06   | 0.02   | 0.12   | 0.05   | <b>0.06 <math>\pm</math> 0.13</b> |
| 30                    | 0.08                                      | 0.06                                                           | 0.12   | 0.04   | 0.25   | 0.09   | <b>0.11 <math>\pm</math> 0.03</b> |
| 70                    | 0.10                                      | 0.07                                                           | 0.15   | 0.05   | 0.26   | 0.12   | <b>0.13 <math>\pm</math> 0.03</b> |
| 150                   | 0.14                                      | 0.08                                                           | 0.22   | 0.05   | 0.28   | 0.21   | <b>0.16 <math>\pm</math> 0.04</b> |
| 300                   | 0.19                                      | 0.08                                                           | 0.31   | 0.06   | 0.36   | 0.28   | <b>0.21 <math>\pm</math> 0.05</b> |
| 500                   | 0.38                                      | 0.08                                                           | 0.40   | 0.06   | 0.48   | 0.45   | <b>0.31 <math>\pm</math> 0.08</b> |
| 1000                  | 0.55                                      | 0.09                                                           | 0.53   | 0.09   | 0.62   | 0.68   | <b>0.42 <math>\pm</math> 0.11</b> |

Exp. 1 to 6 each represent a current clamp experiment with an individual vacuole.
