# Supplementary material for: Vicia faba SV channel VfTPC1 is a hyperexcitable variant of plant vacuole Two Pore Channels
Source: eLife. 2023 Nov 22;12:e86384. doi: 10.7554/eLife.86384 (PMC10665017; doi:10.7554/eLife.86384)
Supplement: Figure 2—source data 1. [file elife-86384-fig2-data1.xlsx]

## Sheet: AtTPC1
AtTPC1 Iss/Cm (pA/PF)
	0mM Ca								10 mM Ca									50 mM Ca
voltage(mV)	Exp 1	Exp 2	Exp 3	Exp 4	Exp 5	mean	SE		Exp 1	Exp 2	Exp 3	Exp 4	Exp 5	mean	SE			Exp 1	Exp 2	Exp 3	Exp 4	mean	SE
-80	-2.49709	-5.90897	-7.46073	-12.7153	-5.58549	-6.83351	1.67638		-2.12152	-8.44599	-3.19765	-2.67748	-7.40045	-4.76862	1.30953			-3.91339	-2.14918	-2.11751	-3.27977	-2.86496	0.441806
-70	-1.40012	-5.44474	-6.24104	-10.1176	-5.40593	-5.72188	1.38647		-1.60072	-4.22776	-2.1331	-2.01502	-5.56098	-3.10752	0.764457			-2.41602	-1.22255	-1.93308	-2.42299	-1.99866	0.282974
-60	-1.03339	-4.96161	-5.47174	-8.68283	-5.03778	-5.03747	1.21482		-1.06356	-2.11539	-1.40587	-1.37292	-3.80823	-1.95319	0.49473			-1.43507	-0.92196	-1.57914	-1.84496	-1.44528	0.194001
-50	-0.928289	-4.58729	-4.87741	-7.95803	-4.75092	-4.62039	1.1148		-0.839459	-1.26457	-0.922436	-1.00537	-2.90511	-1.38739	0.386063			-0.983714	-0.743047	-1.25689	-1.39268	-1.09408	0.144648
-40	-0.619933	-4.35824	-4.56971	-6.79138	-4.57497	-4.18285	0.995816		-0.662743	-0.981572	-0.579585	-0.653671	-2.32592	-1.0407	0.328676			-0.790852	-0.746727	-1.04128	-1.15494	-0.933451	0.0982713
-30	-0.582381	-4.34094	-4.50536	-6.16978	-4.41998	-4.00369	0.920217		-0.647803	-0.831798	-0.483945	-0.473163	-1.80086	-0.847513	0.247115			-0.61353	-0.528645	-0.894369	-0.953942	-0.747621	0.104097
-20	-0.474555	-4.21351	-4.76461	-5.74328	-4.35387	-3.90996	0.899519		-0.500851	-0.583641	-0.326412	-0.335624	-1.28954	-0.607214	0.17749			-0.500179	-0.43003	-0.652916	-0.737607	-0.580183	0.0701303
-10	-0.436135	-4.16536	-5.39519	-5.57638	-4.35639	-3.98589	0.929678		-0.436537	-0.447947	-0.262411	-0.251943	-0.996155	-0.478998	0.135772			-0.370027	-0.312935	-0.49106	-0.594147	-0.442042	0.0628448
0	-0.382965	-3.57023	-4.40698	-3.75145	-4.12481	-3.24729	0.730676		-0.344795	-0.290769	-0.189317	-0.157296	-0.642505	-0.324936	0.0862866			-0.249024	-0.246946	-0.295805	-0.398719	-0.297624	0.0355361
10	0.324591	1.41798	3.68506	8.43855	-1.03255	2.56673	1.65877		-0.227606	-0.123439	-0.129387	-0.0450704	-0.262969	-0.157694	0.0391339			-0.128259	-0.168856	-0.0825162	-0.205284	-0.146229	0.0264286
20	4.548	19.2827	22.9532	41.9105	12.8929	20.3175	6.2373		-0.0944274	0.0652856	-0.0160006	0.0803755	0.117151	0.0304769	0.0380626			-0.0119109	-0.0706495	0.115059	0.0383289	0.0177069	0.039356
30	17.6144	56.1362	52.3845	94.2855	49.4435	53.9728	12.1958		0.298806	0.557945	0.190262	0.297991	0.675122	0.404025	0.0908828			0.133228	0.00997598	0.380295	0.261533	0.196258	0.080002
40	43.5845	111.23	87.9763	161.764	107.682	102.447	19.1014		1.36739	1.64833	0.895743	0.762891	2.20029	1.37493	0.26079			0.360008	0.139582	0.732857	0.632079	0.466132	0.134343
50	80.2864	176.434	131.768	234.009	180.153	160.53	25.791		5.01772	5.44029	3.3106	1.571	5.96712	4.26135	0.806645			0.640032	0.416865	1.19653	1.12279	0.844053	0.188424
60	123.646	251.786	178.607	306.578	263.154	224.754	32.5982		15.5488	16.2697	11.9946	4.30302	16.3777	12.8987	2.29339			1.13832	0.81844	1.891	1.83421	1.42049	0.263728
70	170.954	328.708	227.312	377.007	355.152	291.827	39.6223		41.8836	40.6881	35.1745	12.3544	35.7395	33.168	5.36824			2.03345	1.24634	2.56127	2.9353	2.19409	0.366088
80	219.97	407.855	276.186	457.019	444.127	361.031	47.6487		82.4577	83.0486	74.5821	30.8354	67.3158	67.6479	9.6433			3.36794	1.94237	3.74799	5.04239	3.52517	0.637807
90	274.769	493.289	326.714	526.407	529.294	430.095	53.8162		145.357	145.285	127.017	61.0872	110.431	117.836	15.6051			8.26498	3.35054	5.47896	8.24907	6.33589	1.19123
100	326.839	573.791	382.416	612.118	611.402	501.313	60.9214		216.987	214.521	185.503	103.149	167.944	177.621	20.7522			18.3541	5.80938	9.90666	16.9877	12.7645	2.96676
110	379.85	658.117	441.172	689.539	688.352	571.406	66.6353		302.668	292.729	247.781	150.858	235.065	245.82	26.9902			44.7169	13.0435	21.1289	40.372	29.8153	7.58424

## Sheet: VfTPC1
VfTPC1 Iss/Cm (pA/PF)
		0mM Ca								10 mM Ca									50 mM Ca
	voltage(mV)	Exp 1	Exp 2	Exp 3	Exp 4	Exp 5	mean	SE		Exp 1	Exp 2	Exp 3	Exp 4	Exp 5	Exp 6	mean	SE		Exp 1	Exp 2	Exp 3	Exp 4	Exp 5	Exp 6	mean	SE
	-80	-8.53013	-7.63614	-4.38835	-7.75804	-5.61513	-6.78556	0.769065		-18.1268	-12.2852	-9.17069	-6.73497	-7.54162	-15.7349	-11.599	1.88155		-25.9197	-10.6495	-4.57742	-6.22411	-13.0284	-47.1624	-17.9269	6.60989
	-70	-5.61145	-5.89126	-4.11967	-6.52972	-5.24609	-5.47964	0.399596		-13.9934	-9.22072	-6.35217	-5.7551	-5.16588	-11.3303	-8.63626	1.43597		-19.4771	-5.83588	-2.99289	-3.63631	-9.08398	-31.9521	-12.163	4.65979
	-60	-4.91891	-5.11543	-3.9222	-5.64269	-3.79407	-4.67866	0.35585		-10.3923	-6.99113	-4.98924	-4.71673	-3.91707	-8.01698	-6.5039	0.997096		-14.0436	-3.41771	-2.0188	-2.11417	-7.87693	-21.2805	-8.45862	3.17839
	-50	-4.7899	-5.25599	-3.95502	-5.53702	-2.69701	-4.44699	0.513064		-7.72945	-5.6461	-4.0325	-4.21109	-3.20993	-5.87308	-5.11702	0.666089		-9.8374	-2.13983	-1.49547	-1.33456	-6.3684	-14.6083	-5.96399	2.2054
	-40	-4.90217	-6.22199	-3.99526	-5.27903	-2.01991	-4.48367	0.711974		-5.88113	-4.72956	-3.75658	-3.71133	-2.7519	-4.6553	-4.24763	0.440936		-7.03254	-1.64584	-1.23918	-0.896371	-4.75807	-10.2719	-4.30731	1.54205
	-30	-5.74815	-6.52005	-3.89493	-6.19704	-1.49922	-4.77188	0.935938		-4.92347	-4.13353	-3.60583	-3.52421	-2.52959	-4.00146	-3.78635	0.323553		-4.4812	-1.42987	-1.07499	-0.721522	-3.74834	-7.11225	-3.0947	1.01609
	-20	-6.93974	-14.0446	-3.9942	-8.32638	-1.42658	-6.9463	2.13861		-4.39269	-3.85976	-3.48118	-3.4234	-2.42339	-3.38088	-3.49355	0.264925		-2.53789	-1.33323	-1.01287	-0.507806	-3.39409	-5.0813	-2.3112	0.702182
	-10	-9.00612	-20.7733	-4.69171	-12.1164	-2.02972	-9.72346	3.2623		-3.98575	-3.67027	-3.29024	-3.62032	-2.29958	-2.79223	-3.2764	0.255955		-1.32737	-1.24727	-0.940276	-0.409577	-2.67797	-3.58451	-1.69783	0.486277
	0	-8.97122	-11.7273	-4.01908	-5.15271	-2.37436	-6.44894	1.70895		-3.93216	-3.41073	-3.16815	-3.718	-2.21423	-2.2647	-3.11799	0.297545		-0.485643	-1.20536	-0.882922	-0.297083	-2.37958	-2.83033	-1.34682	0.422145
	10	12.4079	28.9465	3.95502	21.2325	3.84018	14.0764	4.91088		-3.4002	-1.3235	-2.93191	1.0258	-2.19934	-1.72183	-1.7585	0.637947		0.131817	-1.10292	-0.810398	-0.154947	-2.0545	-2.34658	-1.05625	0.406116
	20	52.8714	82.4947	27.5976	62.0339	30.9051	51.1805	10.1698		-0.917475	11.2336	-1.16765	22.8642	-1.48773	-0.785855	4.95653	4.10934		0.719102	-1.00374	-0.566536	0.0496275	-1.43552	-2.08372	-0.720131	0.413888
	30	106.672	137.122	70.4222	110.363	77.7323	100.462	12.0407		13.2691	41.6854	4.51701	65.1402	1.49964	2.10719	21.3698	10.7146		1.62101	-0.328578	0.584233	0.343122	-0.609984	-1.48433	0.0209124	0.438459
	40	163.018	193.319	129.606	162.618	138.326	157.377	11.1474		48.438	87.4099	25.9234	122.397	16.7387	12.5388	52.241	17.9838		4.57274	2.18427	5.39013	1.16245	3.6407	1.90967	3.14333	0.675878
	50	224.193	253.125	192.481	217.456	203.035	218.058	10.3623		103.247	143.724	62.5568	185.31	45.7622	31.0591	95.2766	24.6055		10.1813	10.3593	17.1237	5.37755	18.1437	16.798	12.9973	2.08892
	60	284.331	306.2	252.315	272.25	273.833	277.786	8.78987		170.085	203.676	116.314	255.446	87.0036	64.4952	149.503	29.8977		22.9432	34.3799	38.5341	15.8115	53.6611	49.5911	35.8201	6.00983
	70	341.934	364.801	329.073	328.724	343.126	341.531	6.57053		245.112	267.594	176.062	327.378	137.983	100.733	209.144	34.9288		45.5041	69.1898	61.9103	50.8434	111.622	108.655	74.6208	11.7355
	80	403.944	422.041	394.9	386.056	414.947	404.378	6.51705		323.715	332.476	238.25	398.282	196.126	146.936	272.631	38.6495		77.5186	113.544	90.5053	107.934	179.163	176.238	124.15	17.7214
	90	460.373	479.476	473.976	442.794	485.701	468.464	7.65884		401.137	399.756	300.007	472.935	256.453	194.464	337.459	42.7012		119.481	162.723	121.683	184.812	261.443	254.713	184.142	25.4933
	100	525.668	545.227	550.539	500.76	553.008	535.04	9.82285		489.983	469.098	374.653	549.599	316.742	241.314	406.898	47.5119		166.943	213.309	154.263	273.483	344.229	340.288	248.753	34.1485
	110	591.514	602.819	623.553	559.396	612.133	597.883	10.9731		570.239	539.801	444.763	626.794	382.018	294.441	476.342	51.1408		222.892	269.014	189.046	367.736	435.201	429.494	318.897	43.4779

## Sheet: E605A D606N
E605A/D606N Iss/Cm (pA/PF)
	0mM Ca									10 mM Ca									50 mM Ca
	voltage(mV)	Exp 1	Exp 2	Exp 3	Exp 4	Exp 5	mean	SE		Exp 1	Exp 2	Exp 3	Exp 4	Exp 5	mean	SE			Exp 1	Exp 2	Exp 3	Exp 4	mean	SE
	-80	-4.90883	-8.3625	-14.0794	-4.56697	-7.43421	-7.87039	1.71272		-10.7648	-7.75176	-5.26696	-8.44392	-17.1673	-10.8507	1.91562			-5.80253	-11.3017	-22.9444	-20.6889	-15.1844	4.01676
	-70	-4.05268	-6.66535	-11.8068	-4.44339	-6.24089	-6.64183	1.3852		-6.89234	-5.7407	-4.1979	-6.50826	-11.5816	-7.37688	1.08486			-3.65183	-8.40431	-12.6679	-13.2457	-9.49245	2.22613
	-60	-3.9337	-5.71812	-10.8211	-4.2622	-5.22571	-5.99217	1.24923		-4.75431	-4.47267	-3.77976	-5.37456	-8.04915	-5.36707	0.606975			-2.45732	-6.02526	-6.87437	-8.80754	-6.04112	1.32888
	-50	-3.61225	-5.34276	-9.21693	-3.96955	-5.25697	-5.47969	0.995067		-3.67363	-3.86092	-3.57114	-4.94827	-5.86477	-4.40679	0.363593			-1.90741	-4.25843	-3.86586	-6.14108	-4.0432	0.86797
	-40	-3.62562	-5.16553	-8.29549	-3.97089	-4.63327	-5.13816	0.832907		-3.20043	-3.45236	-3.37767	-4.47918	-4.70177	-3.85681	0.253678			-1.44186	-2.88847	-2.37074	-4.73797	-2.85976	0.693908
	-30	-4.15301	-5.69972	-8.13398	-4.47005	-4.85474	-5.4623	0.716316		-2.87406	-3.21646	-3.16294	-4.15589	-3.81264	-3.48083	0.194772			-1.27075	-1.97476	-1.39307	-4.07514	-2.17843	0.650621
	-20	-5.51708	-6.77022	-9.39822	-5.04997	-6.40469	-6.62803	0.757249		-2.73189	-3.02714	-3.10734	-3.7893	-3.43023	-3.25502	0.152683			-1.17476	-1.19256	-0.800189	-3.65732	-1.70621	0.656631
	-10	-8.70511	-7.4945	-11.4839	-6.61583	-9.59742	-8.77935	0.846193		-2.65328	-2.79445	-3.01332	-3.57673	-3.40695	-3.10864	0.145252			-1.1011	-0.683045	-0.575208	-3.35502	-1.42859	0.652079
	0	-2.48552	-1.88123	-13.0173	-4.42374	-14.4317	-7.24789	2.68654		-2.52444	-2.67178	-2.8985	-3.29217	-3.21279	-2.94164	0.123411			-1.06505	-0.385644	-0.330096	-3.18529	-1.24152	0.669116
	10	24.413	19.1996	10.1068	17.0022	-11.1744	11.9094	6.21102		-1.721	-2.35096	-2.63428	-2.0899	-2.8138	-2.39941	0.176554			-1.00701	-0.211292	-0.102348	-2.96631	-1.07174	0.662927
	20	64.8118	56.0367	71.9634	63.5769	13.2853	53.9348	10.4717		2.86755	-1.24876	-1.36879	3.9743	0.305453	0.505235	0.970527			-0.916709	-0.0937432	0.15844	-2.74206	-0.898517	0.655985
	30	112.508	103.451	159.893	126.592	55.841	111.657	16.9311		17.1676	3.12471	2.97015	21.7741	14.7573	10.6864	3.36009			-0.701869	0.0825794	0.610398	-1.82556	-0.458613	0.529418
	40	162.162	159.209	256.658	193.882	107.588	175.9	24.4735		44.2122	16.2797	14.7893	58.3441	51.6612	35.1342	7.65096			-0.0563186	0.457059	1.96951	1.48393	0.963543	0.463627
	50	212.549	216.615	355.335	266.825	164.809	243.227	32.3448		83.1495	46.6327	38.7609	110.333	113.014	76.6857	12.789			2.16624	1.7441	6.81858	10.6074	5.33408	2.1003
	60	264.571	280.102	458.049	337.842	223.532	312.819	40.6747		131.613	92.0269	76.1441	174.894	187.905	132.618	17.9648			9.65048	6.61695	21.0611	34.0368	17.8413	6.22988
	70	316.175	341.314	557.216	410.943	283.616	381.853	48.583		186.383	151.209	120.028	247.675	271.261	197.81	23.3739			25.9307	22.6086	54.997	79.5402	45.7691	13.4028
	80	369.9	407.168	659.557	482.872	345.448	452.989	56.6267		245.472	219.356	173.727	327.348	360.008	270.011	28.5241			50.3889	62.2716	109.974	145.634	92.0671	22.0131
	90	423.038	473.971	762.034	557.805	405.809	524.531	64.9874		308.238	298.504	231.274	408.731	457.174	348.188	33.984			82.5503	129.42	183.964	234.011	157.486	32.8636
	100	475.913	542.014	863.155	633.896	470.253	597.046	72.7839		373.349	374.758	294.445	495.047	552.337	428.377	39.3067			119.254	216.846	269.574	330.587	234.065	44.773
	110	529.997	608.966	970.593	710.682	534.016	670.851	81.8		439.897	459.465	359.42	587.114	652.102	512.13	44.8892			158.482	318.881	363.463	438.849	319.919	59.2336

## Sheet: E457N E605A D606N
E457N/E605A/D606N Iss/Cm (pA/PF)
		0mM Ca								10 mM Ca									50 mM Ca
	voltage(mV)	Exp 1	Exp 2	Exp 3	Exp 4	Exp 5	mean	SE		Exp 1	Exp 2	Exp 3	Exp 4	Exp 5	mean	SE			Exp 1	Exp 2	Exp 3	Exp 4	mean	SE
	-80	-4.90883	-8.3625	-14.0794	-4.56697	-7.43421	-9.43479	1.94317		-10.7648	-7.75176	-5.26696	-8.44392	-17.1673	-12.8345	3.02867			-5.80253	-11.3017	-22.9444	-20.6889	-11.7249	4.69216
	-70	-4.05268	-6.66535	-11.8068	-4.44339	-6.24089	-7.19069	1.09551		-6.89234	-5.7407	-4.1979	-6.50826	-11.5816	-8.54646	1.77312			-3.65183	-8.40431	-12.6679	-13.2457	-8.05824	3.27061
	-60	-3.9337	-5.71812	-10.8211	-4.2622	-5.22571	-6.0874	0.676278		-4.75431	-4.47267	-3.77976	-5.37456	-8.04915	-6.16307	1.26162			-2.45732	-6.02526	-6.87437	-8.80754	-5.79285	2.27854
	-50	-3.61225	-5.34276	-9.21693	-3.96955	-5.25697	-5.50787	0.501373		-3.67363	-3.86092	-3.57114	-4.94827	-5.86477	-5.06602	1.08167			-1.90741	-4.25843	-3.86586	-6.14108	-4.43738	1.66768
	-40	-3.62562	-5.16553	-8.29549	-3.97089	-4.63327	-5.76565	0.665284		-3.20043	-3.45236	-3.37767	-4.47918	-4.70177	-4.5376	0.957622			-1.44186	-2.88847	-2.37074	-4.73797	-3.38635	1.14979
	-30	-4.15301	-5.69972	-8.13398	-4.47005	-4.85474	-7.13628	1.40157		-2.87406	-3.21646	-3.16294	-4.15589	-3.81264	-4.09089	0.854664			-1.27075	-1.97476	-1.39307	-4.07514	-2.70792	0.814171
	-20	-5.51708	-6.77022	-9.39822	-5.04997	-6.40469	-10.6658	2.78833		-2.73189	-3.02714	-3.10734	-3.7893	-3.43023	-3.74521	0.767074			-1.17476	-1.19256	-0.800189	-3.65732	-2.18163	0.571658
	-10	-8.70511	-7.4945	-11.4839	-6.61583	-9.59742	-15.4159	4.55142		-2.65328	-2.79445	-3.01332	-3.57673	-3.40695	-3.47487	0.73173			-1.1011	-0.683045	-0.575208	-3.35502	-1.66337	0.509999
	0	-2.48552	-1.88123	-13.0173	-4.42374	-14.4317	-7.64459	2.38974		-2.52444	-2.67178	-2.8985	-3.29217	-3.21279	-3.15871	0.713372			-1.06505	-0.385644	-0.330096	-3.18529	-1.19859	0.637478
	10	24.413	19.1996	10.1068	17.0022	-11.1744	19.9928	6.14965		-1.721	-2.35096	-2.63428	-2.0899	-2.8138	-2.50601	0.684441			-1.00701	-0.211292	-0.102348	-2.96631	-0.718893	0.878305
	20	64.8118	56.0367	71.9634	63.5769	13.2853	61.5918	13.4951		2.86755	-1.24876	-1.36879	3.9743	0.305453	0.172036	0.897051			-0.916709	-0.0937432	0.15844	-2.74206	-0.165328	1.19258
	30	112.508	103.451	159.893	126.592	55.841	111.55	19.7392		17.1676	3.12471	2.97015	21.7741	14.7573	10.2735	3.2869			-0.701869	0.0825794	0.610398	-1.82556	0.628389	1.55514
	40	162.162	159.209	256.658	193.882	107.588	166.05	25.0353		44.2122	16.2797	14.7893	58.3441	51.6612	35.4683	8.7318			-0.0563186	0.457059	1.96951	1.48393	2.09889	2.01181
	50	212.549	216.615	355.335	266.825	164.809	224.313	29.1473		83.1495	46.6327	38.7609	110.333	113.014	79.596	15.4897			2.16624	1.7441	6.81858	10.6074	6.32727	2.76892
	60	264.571	280.102	458.049	337.842	223.532	283.829	32.9411		131.613	92.0269	76.1441	174.894	187.905	140.51	20.3391			9.65048	6.61695	21.0611	34.0368	18.3383	4.19868
	70	316.175	341.314	557.216	410.943	283.616	345.69	36.2624		186.383	151.209	120.028	247.675	271.261	212.571	24.3249			25.9307	22.6086	54.997	79.5402	44.1996	5.59671
	80	369.9	407.168	659.557	482.872	345.448	407.667	39.8725		245.472	219.356	173.727	327.348	360.008	292.698	26.9983			50.3889	62.2716	109.974	145.634	88.1751	7.78756
	90	423.038	473.971	762.034	557.805	405.809	470.64	43.4489		308.238	298.504	231.274	408.731	457.174	379.459	30.1437			82.5503	129.42	183.964	234.011	145.761	10.026
	100	475.913	542.014	863.155	633.896	470.253	535.678	46.5809		373.349	374.758	294.445	495.047	552.337	468.655	34.3224			119.254	216.846	269.574	330.587	218.065	13.2801
	110	529.997	608.966	970.593	710.682	534.016	601.964	49.6185		439.897	459.465	359.42	587.114	652.102	559.899	40.8635			158.482	318.881	363.463	438.849	296.904	18.6317
