# Supplementary material for: Vicia faba SV channel VfTPC1 is a hyperexcitable variant of plant vacuole Two Pore Channels
Source: eLife. 2023 Nov 22;12:e86384. doi: 10.7554/eLife.86384 (PMC10665017; doi:10.7554/eLife.86384)
Supplement: Figure 3—source data 1. [file elife-86384-fig3-data1.xlsx]

## Sheet: 0 Ca
0 mM Ca			Half activation time (s) at different voltages									40 mV	ANOVA								50 mV	ANOVA								60 mV	ANOVA								70 mV	ANOVA								80 mV	ANOVA
			40 mV	50mV	60mV	70mV	80mV	90mV	100mV	110mV			Half activation time at 40mV									Half activation time at 50mV									Half activation time at 60mV									Half activation time at 70mV									Half activation time at 80mV
	AtTPC1	Exp 1	0.2896	0.2447	0.2111	0.178	0.1535	0.137	0.12	0.1057				Sum of Squares	df	Mean Square	F						Sum of Squares	df	Mean Square	F						Sum of Squares	df	Mean Square	F						Sum of Squares	df	Mean Square	F
		Exp 2	0.1997	0.1718	0.1454	0.1213	0.1054	0.0928	0.0848	0.0763			Between Groups	0.0655793	3	0.0218598	6.44614					Between Groups	0.0467336	3	0.0155779	6.24429					Between Groups	0.0338387	3	0.0112796	5.66133					Between Groups	0.0244124	3	0.00813746	5.46434					Between Groups
		Exp 3	0.2683	0.2074	0.173	0.149	0.132	0.116	0.105	0.097			Within Groups	0.0542582	16	0.00339114						Within Groups	0.0399158	16	0.00249474						Within Groups	0.0318782	16	0.00199239						Within Groups	0.0238271	16	0.0014892						Within Groups
		Exp 4	0.251	0.233	0.21	0.188	0.171	0.158	0.144	0.134			Total	0.119838	19							Total	0.0866493	19							Total	0.0657169	19							Total	0.0482395	19							Total
		Exp 5	0.068	0.055	0.047	0.044	0.04	0.037	0.036	0.034
	VfTPC1	Exp 1	0.0515	0.0467	0.0439	0.0389	0.0374	0.0346	0.0325	0.0319			Multiple Comparisons									Multiple Comparisons									Multiple Comparisons									Multiple Comparisons									Multiple Comparisons
		Exp 2	0.0479	0.0457	0.0424	0.0386	0.0374	0.0361	0.0344	0.0319			Half activation time at 40mV Dunnett t (2-sided)									Half activation time at 50mV Dunnett t (2-sided)									Half activation time at 60mV Dunnett t (2-sided)									Half activation time at 70mV Dunnett t (2-sided)									Half activation time at 80mV Dunnett t (2-sided)
		Exp 3	0.0874	0.0689	0.0623	0.0584	0.0529	0.05	0.0491	0.0457			Half activation time	Half activation time	Mean Difference (I-J)	Std. Error	Sig.	95% Confidence Interval				Half activation time at 50mV	Half activation time at 50mV	Mean Difference (I-J)	Std. Error	Sig.	95% Confidence Interval				Half activation time at 60mV	Half activation time at 60mV	Mean Difference (I-J)	Std. Error	Sig.	95% Confidence Interval				Half activation time at 70mV	Half activation time at 70mV	Mean Difference (I-J)	Std. Error	Sig.	95% Confidence Interval				Half activation time at 80mV
		Exp 4	0.0538	0.0468	0.0388	0.0346	0.0312	0.028	0.0252	0.0228								Lower Bound	Upper Bound								Lower Bound	Upper Bound								Lower Bound	Upper Bound								Lower Bound	Upper Bound
		Exp 5	0.0562	0.0497	0.0451	0.0401	0.0367	0.0337	0.0315	0.031			AtTPC1 double	AtTPC1	-0.15596	0.0368301	0.00174019	-0.251436	-0.0604838			AtTPC1 double	AtTPC1	-0.13082	0.0315895	0.00211003	-0.212711	-0.0489292			AtTPC1 double	AtTPC1	-0.1108	0.0282304	0.00330301	-0.183983	-0.0376171			AtTPC1 double	AtTPC1	-0.09394	0.0244065	0.00386602	-0.15721	-0.0306699			AtTPC1 double
	E605A/D606N	Exp 1	0.0509	0.0424	0.0365	0.0326	0.0304	0.0281	0.0262	0.0254			VfTPC1	AtTPC1	-0.11502	0.0368301	0.0173103	-0.210496	-0.0195438			VfTPC1	AtTPC1	-0.09982	0.0315895	0.016053	-0.181711	-0.0179292			VfTPC1	AtTPC1	-0.08592	0.0282304	0.020349	-0.159103	-0.0127371			VfTPC1	AtTPC1	-0.07276	0.0244065	0.0230895	-0.13603	-0.00948992			VfTPC1
		Exp 2	0.08	0.063	0.054	0.047	0.043	0.04	0.038	0.035			AtTPC1 triple	AtTPC1	-0.09758	0.0368301	0.0447209	-0.193056	-0.00210375			AtTPC1 triple	AtTPC1	-0.07762	0.0315895	0.0648873	-0.159511	0.00427075			AtTPC1 triple	AtTPC1	-0.06222	0.0282304	0.104162	-0.135403	0.0109629			AtTPC1 triple	AtTPC1	-0.0496	0.0244065	0.141722	-0.11287	0.0136701			AtTPC1 triple
		Exp 3	0.1346	0.1144	0.0994	0.0889	0.0817	0.0758	0.0707	0.0656
		Exp 4	0.132	0.106	0.089	0.078	0.071	0.067	0.063	0.06			*. The mean difference is significant at the 0.05 level.									*. The mean difference is significant at the 0.05 level.									*. The mean difference is significant at the 0.05 level.									*. The mean difference is significant at the 0.05 level.									*. The mean difference is significant at the 0.05 level.
		Exp 5	0.104	0.087	0.078	0.07	0.066	0.063	0.058	0.057
	E605AD606NE457N	Exp 1	0.0986	0.0902	0.0824	0.0779	0.0733	0.0691	0.0649	0.0614
		Exp 2	0.1171	0.1046	0.091	0.0794	0.0701	0.0628	0.0572	0.0533
		Exp 3	0.06	0.053	0.049	0.046	0.043	0.04	0.038	0.036
		Exp 4	0.227	0.199	0.183	0.163	0.151	0.138	0.13	0.12
		Exp 5	0.086	0.077	0.07	0.066	0.062	0.059	0.056	0.053
[truncated: 27 more columns]

## Sheet: 10 Ca
10 mM Ca			Half activation time (s) at different voltages
			40 mV	50 mV	60 mV	70 mV	80 mV	90 mV	100 mV	110 mV
	AtTPC1	Exp 1	--	--	--	--	--	0.212	0.183	0.155
		Exp 2	--	--	--	--	--	0.275	0.232	0.204
		Exp 3	--	--	--	--	--	0.272	0.223	0.19
		Exp 4	--	--	--	--	--	0.3617	0.3469	0.3256
		Exp 5	--	--	--	--	--	0.333	0.3	0.251
	VfTPC1	Exp 1	0.134	0.118	0.11	0.095	0.088	0.074	0.071	0.065
		Exp 2	0.1124	0.0982	0.082	0.073	0.068	0.061	0.058	0.051
		Exp 3	0.047	0.043	0.038	0.035	0.032	0.03	0.028	0.026
		Exp 4	0.0394	0.0325	0.0298	0.0275	0.0245	0.0235	0.0212	0.0199
		Exp 5	0.161	0.109	0.09	0.076	0.067	0.057	0.051	0.045
		Exp 6	0.1273	0.1168	0.1079	0.104	0.096	0.09	0.082	0.076
	E605A/D606N	Exp 1	0.3182	0.29	0.2422	0.2131	0.1762	0.1508	0.1339	0.1144
		Exp 2	0.371	0.3356	0.3023	0.2599	0.2353	0.2057	0.1879	0.1634
		Exp 3	0.168	0.137	0.117	0.098	0.085	0.075	0.068	0.06
		Exp 4	0.288	0.258	0.229	0.205	0.18	0.159	0.141	0.126
		Exp 5	0.287	0.255	0.227	0.197	0.177	0.156	0.143	0.129
	E605AD606NE457N	Exp 1	0.211	0.187	0.157	0.138		0.122	0.109	0.096
		Exp 2	--	0.131	0.11	0.095	0.085	0.076	0.068	0.061
		Exp 3	--	0.1771	0.1534	0.1231	0.1073	0.0952	0.0817	0.073
		Exp 4	--	0.463	0.426	0.403	0.368	0.344	0.314	0.29
		Exp 5	--	0.294	0.269	0.243	0.208	0.185	0.164	0.143

## Sheet: 50 Ca
50 mM Ca			Half activation time (s) at different voltages
			63.8 mV	73.8 mV	83.8 mV	93.8 mV	103.8 mV	113.8 mV
	VfTPC1	Exp 1	0.193	0.188	0.172	0.166	0.161	0.16
		Exp 2	0.127	0.108	0.091	0.08	0.07	0.065
		Exp 3	0.091	0.077	0.075	0.073	0.064	0.061
		Exp 4	0.2261	0.221	0.1898	0.1669	0.1325	0.1175
		Exp 5	0.2074	0.1897	0.1684	0.1453	0.1265	0.1159
		Exp 6	0.1348	0.1244	0.1073	0.0973	0.0863	0.0767
	E605AD606NE457N	Exp 1	--	0.287	0.307	0.2578	0.2325	0.2057
		Exp 2	--	0.363	0.3062	0.269	0.23	0.207
		Exp 3	--	0.284	0.299	0.2737	0.2506	0.2258
		Exp 4	--	0.3379	0.367	0.3427	0.3176	0.2926
	E605A/D606N	Exp 1	--	--	0.254	0.216	0.191	0.163
		Exp 2	--	--	0.352	0.343	0.296	0.261
		Exp 3	--	--	0.275	0.253	0.231	0.208
		Exp 4	--	--	0.3098	0.2932	0.2612	0.2356

## Sheet: 10 Ca-0 Ca
The difference of Half activation time (s) between 10 Ca and 0 Ca at 90 mV
						ANOVA
	AtTPC1	Exp 1	0.10384			10Ca-0Ca half activation time
		Exp 2	0.16684				Sum of Squares	df	Mean Square	F
		Exp 3	0.16384			Between Groups	0.0726309	3	0.0242103	5.65486
		Exp 4	0.25354			Within Groups	0.0727825	17	0.00428132
		Exp 5	0.22484			Total	0.145413	20
	VfTPC1	Exp 1	0.03752
		Exp 2	0.02452			Multiple Comparisons
		Exp 3	-0.00648			10Ca-0Ca half activation time Dunnett t (2-sided)
		Exp 4	-0.01298			10Ca-0Ca half activation time	10Ca-0Ca half activation time	Mean Difference (I-J)	Std. Error	Sig.	95% Confidence Interval
		Exp 5	0.02052								Lower Bound	Upper Bound
		Exp 6	0.05352			AtTPC1 double	AtTPC1	-0.163143	0.0396209	0.00197397	-0.265091	-0.0611961
	E605A/D606N	Exp 1	0.09602			VfTPC1	AtTPC1	-0.08806	0.0413827	0.116658	-0.19454	0.0184204
		Exp 2	0.15092			AtTPC1 triple	AtTPC1	-0.09192	0.0413827	0.098257	-0.1984	0.0145604
		Exp 3	0.02022
		Exp 4	0.10422			*. The mean difference is significant at the 0.05 level.
		Exp 5	0.10122
	E605AD606NE457N	Exp 1	0.04822
		Exp 2	0.00222
		Exp 3	0.02142
		Exp 4	0.27022
		Exp 5	0.11122
