# Supplementary material for: Vicia faba SV channel VfTPC1 is a hyperexcitable variant of plant vacuole Two Pore Channels
Source: eLife. 2023 Nov 22;12:e86384. doi: 10.7554/eLife.86384 (PMC10665017; doi:10.7554/eLife.86384)
Supplement: Figure 4—source data 1. [file elife-86384-fig4-data1.xlsx]

## Sheet: Half deactivation time 
	Half deactivation time (s) at different voltages									-60 mV	ANOVA								-50 mV	ANOVA								-40 mV	ANOVA								-30 mV	ANOVA								-20 mV	ANOVA
											Half deactivation time at -60mV									Half deactivation time at -50mV									Half deactivation time at -40mV									Half deactivation time at -30mV									Half deactivation time at -20mV
AtTPC1												Sum of Squares	df	Mean Square	F						Sum of Squares	df	Mean Square	F						Sum of Squares	df	Mean Square	F						Sum of Squares	df	Mean Square	F						Sum of Squares	df
	voltage (mV)	Exp 1	Exp 2	Exp 3	Exp 4	Exp 5					Between Groups	0.00137776	3	0.000459254	10.3993					Between Groups	0.00147498	3	0.000491659	8.9842					Between Groups	0.00150351	3	0.000501171	6.32793					Between Groups	0.00171851	3	0.000572835	4.16858					Between Groups	0.00203965	3
0Ca	-60	0.0126	0.006	0.0018	0.0043	0.0068					Within Groups	0.00061827	14	4.41621e-05						Within Groups	0.000766148	14	5.47249e-05						Within Groups	0.0011088	14	7.91998e-05						Within Groups	0.00192384	14	0.000137417						Within Groups	0.00392921	14
	-50	0.0155	0.0075	0.0021	0.0051	0.0083					Total	0.00199603	17							Total	0.00224112	17							Total	0.00261231	17							Total	0.00364234	17							Total	0.00596886	17
	-40	0.0204	0.0075	0.003	0.006	0.009
	-30	0.0266	0.0089	0.0047	0.0072	0.0114					Multiple Comparisons									Multiple Comparisons									Multiple Comparisons									Multiple Comparisons									Multiple Comparisons
	-20	0.0359	0.0134	0.0069	0.009	0.0208					Half deactivation time at -60mV Dunnett t (2-sided)									Half deactivation time at -50mV Dunnett t (2-sided)									Half deactivation time at -40mV Dunnett t (2-sided)									Half deactivation time at -30mV Dunnett t (2-sided)									Half deactivation time at -20mV Dunnett t (2-sided)
	-10	0.0493	0.0182	0.0153	0.0102	0.0256					Half deactivation time at -60mV	Half deactivation time at -60mV	Mean Difference (I-J)	Std. Error	Sig.	95% Confidence Interval				Half deactivation time at -50mV	Half deactivation time at -50mV	Mean Difference (I-J)	Std. Error	Sig.	95% Confidence Interval				Half deactivation time at -40mV	Half deactivation time at -40mV	Mean Difference (I-J)	Std. Error	Sig.	95% Confidence Interval				Half deactivation time at -30mV	Half deactivation time at -30mV	Mean Difference (I-J)	Std. Error	Sig.	95% Confidence Interval				Half deactivation time at -20mV	Half deactivation time at -20mV	Mean Difference (I-J)
10 Ca		Exp 1	Exp 2	Exp 3												Lower Bound	Upper Bound								Lower Bound	Upper Bound								Lower Bound	Upper Bound								Lower Bound	Upper Bound
	-60	0.0014	0.0022	0.0018							AtTPC1 double	AtTPC1	0.02335	0.00445791	0.000353037	0.0115817	0.0351183			AtTPC1 double	AtTPC1	0.02425	0.00496248	0.000671824	0.0111497	0.0373503			AtTPC1 double	AtTPC1	0.02467	0.00596992	0.00279872	0.00891014	0.0404299			AtTPC1 double	AtTPC1	0.02559	0.0078637	0.0154057	0.0048308	0.0463492			AtTPC1 double	AtTPC1	0.02585
	-50	0.0016	0.0024	0.0022							VfTPC1	AtTPC1	0.002775	0.00445791	0.872467	-0.00899334	0.0145433			VfTPC1	AtTPC1	0.00305	0.00496248	0.876377	-0.0100503	0.0161503			VfTPC1	AtTPC1	0.003995	0.00596992	0.848237	-0.0117649	0.0197549			VfTPC1	AtTPC1	0.00459	0.0078637	0.891202	-0.0161692	0.0253492			VfTPC1	AtTPC1	0.00545
	-40	0.0017	0.0028	0.0021							AtTPC1 triple	AtTPC1	0.00674	0.00420296	0.297454	-0.0043553	0.0178353			AtTPC1 triple	AtTPC1	0.00752	0.00467867	0.295828	-0.00483112	0.0198711			AtTPC1 triple	AtTPC1	0.01096	0.00562849	0.172358	-0.00389854	0.0258185			AtTPC1 triple	AtTPC1	0.01542	0.00741396	0.137619	-0.00415197	0.034992			AtTPC1 triple	AtTPC1	0.02084
	-30	0.0019	0.0033	0.0024
	-20	0.0024	0.004	0.0027							*. The mean difference is significant at the 0.05 level.									*. The mean difference is significant at the 0.05 level.									*. The mean difference is significant at the 0.05 level.									*. The mean difference is significant at the 0.05 level.
	-10	0.0023	0.005	0.0033
VfTPC1
		Exp 1	Exp 2	Exp 3	Exp 4
0Ca	-60	0.0307	0.0445	0.0233	0.0201
	-50	0.0308	0.048	0.027	0.022
	-40	0.0328	0.0498	0.0288	0.024
	-30	0.0381	0.0536	0.0287	0.029
	-20	0.047	0.0618	0.0323	0.0311
	-10	0.0536	0.0769	0.0411	0.0434
		Exp 1	Exp 2	Exp 3	Exp 4
10 Ca	-60	0.0078	0.0102	0.0119	0.0145
	-50	0.0088	0.0118	0.0141	0.0172
	-40	0.011	0.0133	0.0147	0.0162
	-30	0.0118	0.0156	0.014	0.0171
	-20	0.0117	0.0186	0.015	0.0187
	-10	0.013	0.0235	0.0153	0.0193
		Exp 1	Exp 2	Exp 3	Exp 4	Exp 5	Exp 6
50 Ca	-56.2	0.0128	0.0091	0.0137	0.0052	0.0088	0.0107
	-46.2	0.0151	0.009	0.0161	0.0053	0.0109	0.0111
	-36.2	0.017	0.0111	0.0171	0.0069	0.0106	0.0133
	-26.2	0.0192	0.0127	0.0208	0.0088	0.0128	0.0134
	-16.2	0.0228	0.0162	0.0244	0.0086	0.0149	0.0159
	-6.2	0.0278	0.02	0.027	0.0102	0.0162	0.0171
E605A/D606N		Exp 1	Exp 2	Exp 3	Exp 4
0Ca	-60	0.0096	0.0075	0.0127	0.0065
	-50	0.0116	0.0089	0.0149	0.0076
	-40	0.0147	0.0106	0.0191	0.0083
	-30	0.0193	0.0132	0.0237	0.0092
	-20	0.0264	0.0162	0.0351	0.0129
	-10	0.0344	0.0265	0.0459	0.0184
		Exp 1	Exp 2	Exp 3	Exp 4	Exp 5
10 Ca	-60	0.0028	0.0022	0.0025	0.0022	0.0025
	-50	0.0029	0.0025	0.0026	0.0024	0.0026
	-40	0.003	0.0027	0.0026	0.0025	0.0032
	-30	0.0037	0.0027	0.0031	0.0024	0.0034
	-20	0.0041	0.0031	0.0037	0.0033	0.0041
	-10	0.0051	0.0033	0.0042	0.0037	0.0053
		Exp 1	Exp 2	Exp 3	Exp 4
50 Ca	-56.2	0.002	0.0018	0.0008	0.0013
	-46.2	0.0024	0.002	0.0009	0.0014
	-36.2	0.0023	0.0021	0.001	0.0015
	-26.2	0.0025	0.0023	0.0011	0.0017
	-16.2	0.0027	0.0024	0.0012	0.0019
	-6.2	0.0028	0.0027	0.0012	0.002
E605AD606NE457N
		Exp 1	Exp 2	Exp 3	Exp 4	Exp 5
0Ca	-60	0.0183	0.0091	0.0124	0.0045	0.0209
	-50	0.0203	0.0109	0.0145	0.005	0.0254
	-40	0.0278	0.0137	0.0187	0.0064	0.0341
	-30	0.0368	0.0169	0.026	0.007	0.0492
	-20	0.0508	0.0229	0.0369	0.0078	0.0718
	-10	0.0521	0.032	0.0552	0.0101	0.1042
		Exp 1	Exp 2	Exp 3	Exp 4	Exp 5
10 Ca	-60	0.0053	0.0046	0.0044	0.0043	0.0039
	-50	0.0056	0.0052	0.0051	0.005	0.005
	-40	0.0067	0.0055	0.0059	0.0054	0.0049
	-30	0.0071	0.0064	0.0064	0.0064	0.0053
	-20	0.0086	0.0106	0.0082	0.0084	0.0062
	-10	0.0102	0.011	0.0116	0.0101	0.0081
		Exp 1	Exp 2	Exp 3	Exp 4
50 Ca	-56.2	0.0022	0.0025	0.0028	0.0025
	-46.2	0.0023	0.0027	0.0031	0.0027
	-36.2	0.0029	0.0029	0.0035	0.003
	-26.2	0.0031	0.0035	0.004	0.0032
	-16.2	0.0033	0.004	0.0045	0.0036
	-6.2	0.0036	0.0049	0.005	0.0039
[truncated: 11 more columns]
