# Supplementary material for: Vicia faba SV channel VfTPC1 is a hyperexcitable variant of plant vacuole Two Pore Channels
Source: eLife. 2023 Nov 22;12:e86384. doi: 10.7554/eLife.86384 (PMC10665017; doi:10.7554/eLife.86384)
Supplement: Figure 5—source data 1. [file elife-86384-fig5-data1.xlsx]

## Sheet: Fig 5  G_Gmax
Fig.5a
AtTPC1 G/Gmax
	0mM Ca									10 mM Ca
voltage(mV)	Exp 1	Exp 2	Exp 3	Exp 4	Exp 5	mean	SE			Exp 1	Exp 2	Exp 3	Exp 4	Exp 5	mean	SE
-80	-0.000119524	5.25857e-05	-0.00246231	-7.96263e-05	0.00246331	-2.91128e-05	0.000779423			0.000869755	0.000545524	-0.000753707	0.00117507	-0.00282531	-0.000197733	0.000734501
-70	0.00018604	-0.000134386	-0.00113344	-8.95707e-05	0.00262876	0.000291479	0.000625737			0.000724594	0.000445157	-0.000362726	0.00107966	-0.00197263	-1.7188e-05	0.000543609
-60	0.000161477	0.000146072	0	0.000179141	-7.35042e-05	8.26372e-05	5.03795e-05			0.000462525	-0.000142098	-0.000183455	0.00100936	-0.00108176	1.29138e-05	0.000350425
-50	0.000335434	-9.9327e-05	0	-8.95707e-05	0.000147008	5.87089e-05	8.20921e-05			0.000290964	-0.000620032	0.000331019	0.000672908	-0.00166719	-0.000198466	0.000425091
-40	-0.00051443	3.5056e-05	0.000390843	0.00013935	-7.35042e-05	-4.53683e-06	0.000148886			-0.000121916	-0.000114269	8.70426e-05	0.000215934	0	1.33582e-05	6.37309e-05
-30	-0.00016873	0.0013964	0.00115299	0.00110465	0.000147006	0.000726463	0.000309104			2.32522e-05	0.000431242	-0.000433323	0	0	4.23438e-06	0.000136783
-20	-0.000547948	0.00191051	0.00379117	0.00505554	0.00552426	0.00314671	0.00111558			-4.65045e-05	0.000827684	0.000198716	0	-1.27268e-05	0.000193434	0.000164285
-10	0.00066768	0.00628079	0.00748462	0.0221232	0.0117285	0.00965696	0.00358207			2.32522e-05	0.0014726	0.00205365	7.03038e-05	0.0010054	0.000925042	0.000395211
0	0.00435698	0.0188893	0.0199525	0.0706389	0.0404064	0.0308488	0.0114852			0.000485153	0.00225659	0.00153921	-0.00010545	0.00241806	0.00131871	0.000492943
10	0.0107162	0.0526192	0.0578055	0.164197	0.117478	0.0805633	0.026958			0.000290968	0.00313006	0.00183611	-0.000421816	0.00197263	0.00136159	0.000634539
20	0.0302023	0.125086	0.133961	0.264582	0.242557	0.159278	0.0427171			0.000647295	0.00409295	0.00367338	-0.000100427	0.00274895	0.00221243	0.000829384
30	0.0726274	0.222821	0.26251	0.376492	0.378723	0.262635	0.056625			0.00112428	0.00645692	0.00440532	-0.000482075	0.00433978	0.00316884	0.00124942
40	0.135538	0.336976	0.404717	0.470846	0.51285	0.372185	0.0662648			0.00273244	0.00870164	0.00862365	0.00064783	0.00710146	0.0055614	0.00163946
50	0.22037	0.439796	0.552807	0.564084	0.631697	0.481751	0.0722467			0.0074815	0.0153782	0.0132595	0.00195848	0.0124466	0.0101049	0.00241339
60	0.29525	0.545565	0.677016	0.635072	0.716075	0.573796	0.0751788			0.0211707	0.0308985	0.0307355	0.0074572	0.0243079	0.0229139	0.00429431
70	0.372382	0.626096	0.762395	0.696347	0.793202	0.650084	0.0751434			0.0534754	0.0631027	0.0541022	0.0225725	0.0539354	0.0494376	0.00695256
80	0.448381	0.678346	0.845312	0.755351	0.827257	0.71093	0.0719574			0.102024	0.110709	0.0888751	0.055776	0.0868592	0.0888486	0.00935208
90	0.510937	0.762206	0.898878	0.789755	0.874577	0.767271	0.0689468			0.152454	0.17344	0.127628	0.103794	0.142449	0.139953	0.0117116
100	0.585792	0.808468	0.930868	0.834687	0.911446	0.814252	0.0615186			0.198645	0.238197	0.180862	0.160508	0.200941	0.195831	0.0128465
110	0.646519	0.849414	0.954024	0.884021	0.941583	0.855112	0.0555157			0.245848	0.30042	0.230597	0.214471	0.258134	0.249894	0.0146019
VfTPC1 G/Gmax
	0mM Ca								10 mM Ca									50 mM Ca
voltage(mV)	Exp 1	Exp 2	Exp 3	Exp 4	Exp 5	mean	SE		Exp 1	Exp 2	Exp 3	Exp 4	Exp 5	Exp 6	mean	SE		Exp 1	Exp 2	Exp 3	Exp 4	Exp 5	Exp 6	mean	SE
-80	0.00261843	-1.20749e-05	0.000173978	0.00102667	0.0043643	0.00163426	0.000825643		0.00143518	-0.000483461	-0.00163917	-0.00141342	0.00171613	-0.000797958	-0.000197117	0.000586709		0.00610332	0.000532437	-0.000544138	0.0180738	0.000166873	-0.000181218	0.00402518	0.00298519
-70	0.000984006	0.00117784	0.000436089	0.00197129	0.00763311	0.00244047	0.0013213		0.00287034	0.000379003	-0.0014936	0.000796149	0.00125413	0	0.000634338	0.000588948		0.00624556	0.000376338	-0.000529094	0.0179971	-0.000225151	-1.65681e-05	0.0039747	0.00299214
-60	0.000431635	-2.70603e-05	0.00132315	0.00164435	0.00931166	0.00253675	0.00172008		0.00264374	0.00034004	-0.00081642	0.000470932	0.000700585	0	0.00055648	0.000469968		0.00648737	0.000118585	-0.000263287	0.016903	0.00123198	0.000166721	0.00410739	0.00275803
-50	0.00155151	0.00243913	0.00225484	0.00482965	0.0102923	0.00427349	0.00160288		0.00207716	0.000116755	-0.00037973	0	-0.000344053	0.000456756	0.000321149	0.000373301		0.00576182	-3.75136e-05	-0.0001981	0.0155531	0.0026252	0.000108732	0.00396888	0.00250021
-40	0.00293378	0.00335658	0.00448109	0.00490267	0.0122624	0.00558731	0.00170686		0.00064199	-0.000352337	0	0	-1.52585e-05	0.000583334	0.000142955	0.000158555		0.00573335	-4.11444e-05	0.000293388	0.0141676	0.000109743	0	0.00337716	0.00234706
-30	0.0075621	0.0163772	0.00425217	0.0155485	0.0132696	0.0114019	0.00235901		0	0.000653415	0	0.0014805	3.0517e-05	0.000803453	0.000494648	0.000244762		0.00431066	5.6879e-05	7.52514e-06	0.0112635	-0.000477679	0	0.00252681	0.00189183
-20	0.0220602	0.0663524	0.00663462	0.04894	0.0162204	0.0320415	0.0110866		0	-0.000450712	0.00120248	0.000314164	-1.52585e-05	0.0019096	0.000493379	0.000362127		0.00284537	0.000104063	-0.000102813	0.00901898	0.000626129	5.59181e-05	0.00209127	0.00145618
-10	0.0876771	0.234147	0.0195296	0.174365	0.0344903	0.110042	0.0411948		2.51376e-05	0.00456989	0.00170879	0.00188436	0.000596531	0.00618007	0.00249413	0.000976051		0.000810972	-2.66169e-05	0.000564199	0.00558309	-0.000258193	0.000351044	0.00117075	0.000896542
0	0.257008	0.557919	0.0504364	0.355716	0.090069	0.26223	0.0923837		0.00464536	0.0133595	0.00394287	0.00288262	0.000400927	0.0303887	0.00927	0.00458965		0	-5.56669e-05	0.000353563	0.00247967	-0.00073663	0.000187431	0.000371394	0.000448219
10	0.484113	0.737129	0.130982	0.567093	0.232342	0.430332	0.110574		0.0133067	0.0522606	0.00805028	0.00674089	0.00584879	0.0985184	0.0307876	0.0153529		0	0.000525167	0.00252506	0	0.000201821	0.00100963	0.00071028	0.000395172
20	0.642032	0.839789	0.253868	0.690907	0.460301	0.577379	0.101068		0.0380446	0.150053	0.0183537	0.0137507	0.0154087	0.248029	0.0806066	0.0396907		0.00156486	0.00161422	0.0111661	0	0.00320729	0.000678265	0.00303846	0.00168415
30	0.74985	0.885908	0.388828	0.773794	0.616212	0.682918	0.0851122		0.131822	0.280456	0.0530293	0.0303275	0.0480837	0.400507	0.157371	0.0616141		0.0074261	0.00659126	0.0264522	0.00343065	0.00573172	0.00142281	0.00850912	0.00369922
40	0.820386	0.907633	0.50187	0.82784	0.73158	0.757862	0.069807		0.283169	0.433719	0.139424	0.084544	0.134014	0.532748	0.267936	0.0743695		0.0262476	0.0220376	0.0825613	0.0190759	0.0245898	0.00335405	0.0296444	0.0111026
50	0.858524	0.938105	0.586254	0.867778	0.806916	0.811516	0.0600683		0.419082	0.54417	0.273513	0.156952	0.249502	0.63038	0.378933	0.0751181		0.050276	0.0613454	0.169213	0.070889	0.0759423	0.010027	0.0729487	0.0215157
60	0.894925	0.932024	0.653252	0.897207	0.857814	0.847044	0.0498508		0.54228	0.623669	0.390217	0.255931	0.37006	0.714019	0.482696	0.0706154		0.0985462	0.152112	0.287609	0.167061	0.1817	0.0290247	0.152675	0.0353442
70	0.911818	0.951211	0.735739	0.92021	0.894939	0.882784	0.0378787		0.625886	0.696615	0.504851	0.34911	0.474386	0.77003	0.570146	0.0635992		0.162835	0.251898	0.38597	0.302866	0.317404	0.0789989	0.249995	0.0457051
80	0.937858	0.962482	0.782449	0.937753	0.921876	0.908483	0.032171		0.699609	0.739818	0.594405	0.443725	0.554848	0.815888	0.641382	0.0554663		0.237623	0.36195	0.476032	0.434833	0.425943	0.154588	0.348495	0.0515725
90	0.942977	0.978758	0.817886	0.9535	0.941931	0.92701	0.028076		0.759634	0.808789	0.665541	0.523727	0.634319	0.85178	0.707298	0.0498941		0.317148	0.458128	0.550321	0.55024	0.552988	0.236594	0.444237	0.0559098
100	0.966756	1.00242	0.867408	0.965438	0.957152	0.951835	0.0224975		0.805635	0.845211	0.723766	0.59	0.70178	0.889515	0.759318	0.0446159		0.384297	0.544651	0.623155	0.660063	0.627709	0.314263	0.52569	0.0585992
110	0.97804	1.02287	0.901104	0.979135	0.957251	0.96768	0.0197808		0.852856	0.892715	0.778909	0.657888	0.755297	0.916008	0.808946	0.0395839		0.455856	0.630538	0.684506	0.747098	0.719453	0.387766	0.604203	0.0604691
E605A/D606N G/Gmax
	0mM Ca									10 mM Ca										50 mM Ca
voltage(mV)	Exp 1	Exp 2	Exp 3	Exp 4	Exp 5	mean	SE			Exp 1	Exp 2	Exp 3	Exp 4	Exp 5	mean	SE				Exp 1	Exp 2	Exp 3	Exp 4	mean	SE
-80	0.000210097	0.000104871	-0.000784569	-1.78211e-05	0.000942058	9.09272e-05	0.000275421			-0.00174239	-2.12472e-05	4.10126e-05	0.000251601	-0.000640216	-0.000422249	0.000361924				0.000920389	-0.00123532	-0.000437218	-0.000823181	-0.000393833	0.000467396
-70	0.000144429	0.00025922	0.00046352	3.56423e-05	0.000279273	0.000236417	7.16605e-05			-0.000995654	-0.000198907	0.000153798	-0.000117223	-0.000370497	-0.000305697	0.000192133				0.0010142	-0.000769822	-0.00039358	-0.000517417	-0.000166656	0.000401326
-60	-0.000151011	0.000431276	0.00112076	-1.78211e-05	0.000144386	0.000305518	0.000225761			-0.000688174	0.000170394	-0.000205064	-0.000214433	-6.81096e-05	-0.000201077	0.000140201				0.000627277	-0.000564125	0.000271058	-0.000211654	3.06393e-05	0.000262397
-50	-0.000971652	-0.000193667	-0.000324332	-5.34621e-05	-0.000288772	-0.000366377	0.000158413			0	0.000295002	-0.000215317	-0.000225869	0.000136219	-1.99303e-06	0.000100732				0.000756248	-0.000300099	0.000188818	-0.00023518	0.000102446	0.000243405
-40	0.000768137	0.000279481	-0.00039535	-0.00017821	0.000144386	0.000123689	0.00020007			0	-0.000199318	0.00022557	0.000305924	-6.81096e-05	5.28132e-05	9.35125e-05				2.93113e-05	-0.000226912	0.000282808	-0.000399833	-7.86567e-05	0.000149289
-30	0.00572471	0.00535753	0.00347721	0.00174648	-0.000248666	0.00321145	0.00112052			0.000702814	-4.59223e-05	5.12648e-05	0.000394557	0.000119867	0.000244516	0.000135976				-7.62112e-05	9.01222e-05	-0.000319732	-2.35141e-05	-8.23338e-05	8.6408e-05
-20	0.0258796	0.0245691	0.0136705	0.00858983	0.0103299	0.0166078	0.00361715			0.0019181	0.000107474	-0.000287088	6.86194e-05	-3.54233e-05	0.000354336	0.000396942				6.44884e-05	5.99117e-05	-0.000208959	0	-2.11396e-05	6.43068e-05
-10	0.103446	0.0605531	0.0356533	0.0331118	0.0288045	0.0523137	0.0139308			0.00434866	0.000160114	-0.00025633	0.000557527	0.00195062	0.00135212	0.000835967				-1.75885e-05	-6.83953e-05	0.000245883	0	3.99748e-05	7.01509e-05
0	0.279095	0.157995	0.134089	0.117495	0.0993543	0.157606	0.0318707			0.0091073	0.00168091	0.000717722	0.00453454	0.00431262	0.00407062	0.00145936				0.000474856	-4.29446e-05	0.000776251	0.000588013	0.000449044	0.00017538
10	0.493313	0.287316	0.318598	0.291894	0.272207	0.332665	0.0408531			0.0232368	0.0029858	0.0030657	0.0153448	0.0112516	0.0111769	0.00384515				0.000732808	5.14282e-05	0.00181014	0.00117603	0.000942599	0.000370282
20	0.647133	0.415807	0.518948	0.46517	0.46429	0.502269	0.0397229			0.058436	0.00750049	0.00892027	0.0442103	0.0307933	0.0299721	0.00990391				0.00164735	0.000267743	0.00261744	0.0021639	0.00167411	0.000508949
30	0.749483	0.516028	0.659883	0.619074	0.601748	0.629243	0.0381271			0.123534	0.0225945	0.0248024	0.103239	0.0918212	0.0731982	0.0208396				0.00359363	0.000751796	0.00475066	0.00592721	0.00375583	0.00110887
40	0.8065	0.607678	0.754981	0.703618	0.710722	0.7167	0.0328802			0.202645	0.049218	0.0595095	0.186385	0.200482	0.139648	0.0349667				0.00872912	0.00184025	0.00857066	0.0132892	0.00810731	0.00235813
50	0.852357	0.67935	0.815342	0.787806	0.777897	0.782551	0.0288512			0.29445	0.102715	0.116322	0.283168	0.319294	0.22319	0.0468221				0.025695	0.00481614	0.0182902	0.0349753	0.0209442	0.00636789
60	0.882196	0.741123	0.86023	0.82694	0.824868	0.827072	0.0240108			0.383238	0.17593	0.188679	0.379081	0.432678	0.311921	0.0537871				0.0647974	0.0145863	0.0423011	0.08324	0.0512312	0.0148077
70	0.913445	0.793402	0.891378	0.862316	0.858527	0.863813	0.0202622			0.462964	0.245879	0.265651	0.45818	0.52818	0.392171	0.0571297				0.142181	0.038817	0.0889618	0.154696	0.106164	0.0265896
80	0.932616	0.830005	0.914941	0.892718	0.888678	0.891792	0.0173646			0.545778	0.339447	0.348546	0.537938	0.612729	0.476888	0.0558066				0.234925	0.0861793	0.156183	0.247369	0.181164	0.0375494
90	0.944269	0.869	0.930493	0.919182	0.912013	0.914992	0.0127263			0.609867	0.412519	0.427589	0.613164	0.680983	0.548824	0.0541334				0.342231	0.151936	0.224259	0.351871	0.267574	0.0482423
100	0.96288	0.90183	0.944094	0.936826	0.936714	0.936469	0.00988869			0.683457	0.47812	0.495864	0.676895	0.737009	0.614269	0.0530708				0.4414	0.220853	0.297791	0.448659	0.352176	0.0558819
110	0.979818	0.936452	0.966915	0.956198	0.958333	0.959543	0.0071108			0.738437	0.554374	0.566518	0.73987	0.788933	0.677626	0.0487327				0.526826	0.284967	0.36163	0.545259	0.429671	0.063488
E457N/E605A/D606N G/Gmax
						0mM Ca									10 mM Ca									50 mM Ca
voltage(mV)	Exp 1	Exp 2	Exp 3	Exp 4	Exp 5	mean	SE			Exp 1	Exp 2	Exp 3	Exp 4	Exp 5	mean	SE				Exp 1	Exp 2	Exp 3	Exp 4	mean	SE
-80	-0.00020392	0.00087485	0.00134126	0	0.00194397	0.000791232	0.000403405			-0.000260868	0.000223936	-0.000345811	-0.00013152	0.00189736	0.00027662	0.000416682				-0.00901063	-0.00188993	0.000151877	-0.00158167	-0.00308259	0.00202646
-70	0.000390615	-0.000411878	0.000204485	0	-0.000143997	7.84493e-06	0.000138648			0.000155556	-0.000457222	0.000214074	0.000807911	0.001383	0.000420663	0.000313025				-0.00868754	-0.00146681	-0.000285562	-0.00182229	-0.00306555	0.00190256
-60	-0.000169471	-0.000334774	-0.000292095	0.00154495	0	0.000149722	0.000353617			-0.000107314	0.000178925	0	0.0014843	0.000891567	0.000489496	0.000303607				-0.00757467	-0.00148092	-0.000230882	-0.00223751	-0.002881	0.00161833
-50	-1.72247e-05	-0.000324919	3.44091e-05	0.00364515	0	0.000667483	0.000747212			0.000663479	0.000119834	0	0.00257404	0.000308619	0.000733195	0.000473689				-0.00656952	-0.00114242	-6.07572e-06	-0.00205191	-0.00244248	0.00143792
-40	0.000651107	0.000796112	0.0012755	0.00702773	0.00129598	0.00220929	0.00121137			-0.0003229	-6.72342e-05	0.000444614	0.00306255	-0.000617238	0.000499958	0.00066396				-0.00585153	-0.00097317	-0.000182272	-0.00253389	-0.00238522	0.00125447
-30	0.0026216	0.0197661	0.00208966	0.0268185	0.00679194	0.0116176	0.00496217			-0.000127953	1.76158e-06	0.00135031	0.00387046	0.000308619	0.00108064	0.000744194				-0.00488225	-0.000874443	-4.25293e-05	-0.00308777	-0.00222175	0.00109516
-20	0.00618911	0.0782724	0.0117752	0.0869985	0.0395034	0.0445477	0.0165986			-0.000420353	0.000637911	0.00247008	0.0049602	0.000182811	0.00156613	0.000976169				-0.0030873	-0.000775717	8.50587e-05	-0.0031692	-0.00173679	0.00082252
-10	0.0169802	0.24143	0.0369162	0.25837	0.172126	0.145164	0.0504769			-3.34602e-05	0.00114597	0.00278296	0.0064445	0.00165732	0.00239946	0.00110794				-0.00193854	-0.000465429	-4.25293e-05	-0.00343037	-0.00146922	0.000769708
0	0.0490734	0.465592	0.0989746	0.499403	0.415674	0.305743	0.0958575			0.000574824	0.00362968	0.00625754	0.00749666	0.00601228	0.0047942	0.00122653				0	0	-0.00034631	-0.00341936	-0.000941418	0.000830005
10	0.120331	0.631241	0.238252	0.655861	0.602271	0.449591	0.112234			0.00261542	0.0108152	0.0201723	0.0104841	0.0152137	0.0118602	0.00290508				0	0	0.000176205	-0.00328511	-0.000777226	0.000836992
20	0.219476	0.731727	0.403592	0.750877	0.710127	0.56316	0.106966			0.00511367	0.0257941	0.0518882	0.0192771	0.0385887	0.0281324	0.00802314				0.00229754	0.000423123	0.000741239	-0.00297112	0.000122696	0.0011096
30	0.326556	0.799645	0.535584	0.815731	0.781503	0.651804	0.0961365			0.01749	0.0702631	0.128806	0.0409592	0.105582	0.0726201	0.0203601				0.00592331	0.00121295	0.00243634	-0.00281119	0.00169035	0.001802
40	0.424841	0.842593	0.630718	0.856615	0.826693	0.716292	0.0836952			0.0362893	0.146418	0.227709	0.0980767	0.199757	0.14165	0.0344999				0.0119184	0.00266567	0.0053223	0.00129775	0.00530104	0.00235871
50	0.512388	0.876365	0.716433	0.886605	0.862043	0.770767	0.0716284			0.0774582	0.245806	0.334202	0.179489	0.30895	0.229181	0.0464532				0.0358989	0.00899839	0.018312	0.0132894	0.0191247	0.00590641
60	0.595217	0.901244	0.772637	0.912717	0.890148	0.814393	0.0603038			0.139047	0.34739	0.450065	0.308171	0.407674	0.330469	0.0537074				0.0831061	0.0239347	0.052293	0.0477992	0.0517832	0.0121546
70	0.664019	0.920517	0.824423	0.932649	0.915299	0.851381	0.0506463			0.208212	0.439443	0.527066	0.412767	0.480473	0.413592	0.0548632				0.169263	0.0542303	0.109367	0.119838	0.113175	0.0235925
80	0.726038	0.941357	0.856789	0.947551	0.938003	0.881948	0.042377			0.281702	0.522896	0.60754	0.526458	0.557709	0.499261	0.0564671				0.278755	0.104963	0.191079	0.241421	0.204054	0.0375987
90	0.772701	0.958339	0.885436	0.966091	0.956723	0.907858	0.0368086			0.358824	0.60357	0.666872	0.605257	0.627811	0.572467	0.0546173				0.388428	0.167782	0.288137	0.371735	0.30402	0.0504338
100	0.827373	0.976433	0.920637	0.976946	0.97842	0.935962	0.0292802			0.433511	0.662674	0.730436	0.679265	0.68079	0.637335	0.0522017				0.513462	0.229079	0.373968	0.527977	0.411121	0.0699098
110	0.869025	0.99616	0.935383	0.993011	0.999972	0.95871	0.0253665			0.496119	0.725292	0.791217	0.713254	0.739348	0.693046	0.0509949				0.61922	0.288006	0.462191	0.660685	0.507525	0.0847434

## Sheet: Fig 5 midpoint voltages V1_V2
Fig.5b	V1 values																							ANOVA
	AtTPC1			VfTPC1				E605A/D606N				E457N/E605A/D606N				ANOVA								V2 values
	0 mM Ca	10 mM Ca		0 mM Ca	10 mM Ca	50 mM Ca		0 mM Ca	10 mM Ca	50 mM Ca		0 mM Ca	10 mM Ca	50 mM Ca		V1 values									Sum of Squares	df	Mean Square	F
	87.34	157.24		-7.47553	68.4583	115.746		-9.90944	116.884	104.835		-23.3609	65.0146	98.1108			Sum of Squares	df	Mean Square	F				Between Groups	844.981	3	281.66	5.68426
	52.89	161.32		-36.6477	51.4751	94.0483		9.03305	86.7937	145.589		19.0966	71.5145	147.36		Between Groups	9619.36	3	3206.45	5.38961				Within Groups	792.815	16	49.5509
	42.99	156.97		37.0189	30.8532	81.7162		24.549	75.104	132.412		-24.0627	70.5911	113.783		Within Groups	9518.91	16	594.932					Total	1637.8	19
	40.12	163.48		-16.7055	48.6437	84.2031		3.36185	60.913	103.803		47.4142	62.1086	97.9606		Total	19138.3	19
	32.44	192.7		6.06503	62.9943	84.6366		7.62761	72.403			-17.2369	88.4889
					80.3776	125.22										Multiple Comparisons								Multiple Comparisons
mean	51.156	166.342		-3.54896	57.1337	97.595		6.93241	82.4195	121.66		0.37006	71.5435	114.304		V1 values Dunnett t (2-sided)								V2 values Dunnett t (2-sided)
SE	9.62043	6.70387		12.2927	7.0655	7.53786		5.53009	9.54807	10.3688		14.202	4.58093	11.6272		V1 values	V1 values	Mean Difference	Std. Error	Sig.	95% Confidence Interval			V2 values	V2 values	Mean Difference (I-J)	Std. Error	Sig.	95% Confidence Interval
																					Lower Bound	Upper Bound							Lower Bound	Upper Bound
	V2 values															AtTPC1 double	AtTPC1	-44.2224	15.4264	0.0290737	-84.2128	-4.23192		AtTPC1 double	AtTPC1	-11.9975	4.45201	0.0409058	-23.5386	-0.456367
	AtTPC1			VfTPC1				E605A/D606N				E457N/E605A/D606N				VfTPC1	AtTPC1	-54.7037	15.4264	0.00724519	-94.6942	-14.7133		VfTPC1	AtTPC1	-12.4029	4.45201	0.0341592	-23.9441	-0.861787
	0 mM Ca	10 mM Ca		0 mM Ca	10 mM Ca	50 mM Ca		0 mM Ca	10 mM Ca	50 mM Ca		0 mM Ca	10 mM Ca	50 mM Ca		AtTPC1 triple	AtTPC1	-50.7847	15.4264	0.0122421	-90.7752	-10.7943		AtTPC1 triple	AtTPC1	-17.7726	4.45201	0.00287359	-29.3137	-6.23143
	36.7534	82.5659		8.78212	43.4148	64.3657		8.26151	55.4678	72.0295		0.858451	35.7274	61.277
	26.1581	81.7999		4.94774	36.6357	58.1654		14.2208	44.2952	82.2616		13.243	39.6287	78.2882		*. The mean difference is significant at the 0.05 level.								*. The mean difference is significant at the 0.05 level.
	22.6702	72.3505		19.079	20.846	50.039		6.79603	34.9472	75.3441		-0.28846	37.2262	71.3539
	13.3901	92.3233		5.74968	30.5142	57.5622		14.6913	37.1384	65.2376		15.5844	50.722	63.2663
	21.135	96.2593		19.5338	44.1753	58.0093		16.1506	30.6024			1.84581	45.718
					49.377	73.4365
mean	24.0214	85.0598		11.6185	37.4938	60.263		12.024	40.4902	73.7182		6.24864	41.8045	68.5464
SE	3.80691	4.22232		3.20389	4.27205	3.22323		1.87693	4.35049	3.54031		3.37083	2.80592	3.91055
Fig.5c
	AtTPC1			VfTPC1				E605A/D606N				E457N/E605A/D606N				ANOVA								ANOVA
	V1(10 Ca)-V1(0Ca)			V1(10 Ca)-V1(0Ca)	V1(50 Ca)-V1(0Ca)			V1(10 Ca)-V1(0Ca)	V1(50 Ca)-V1(0Ca)			V1(10 Ca)-V1(0Ca)	V1(50 Ca)-V1(0Ca)			10Ca-0Ca V1								10Ca-0Ca V2
	106.086			72.0073	119.295			109.952	97.9026			64.6445	97.7407				Sum of Squares	df	Mean Square	F					Sum of Squares	df	Mean Square	F
	110.161			55.0241	97.5973			79.8613	138.657			71.1444	146.99			Between Groups	8918.91	3	2972.97	10.8935				Between Groups	4005.73	3	1335.24	15.7625
	105.814			34.4022	85.2652			68.1716	125.48			70.221	113.413			Within Groups	4639.5	17	272.912					Within Groups	1440.07	17	84.71
	112.329			52.1927	87.7521			53.9806	96.8706			61.7385	97.5905			Total	13558.4	20						Total	5445.8	20
	141.545			66.5433	88.1856			65.4706				88.1188
				83.9266	128.769
mean	115.187			60.6827	101.144			75.4871	114.727			71.1735	113.934											Multiple Comparisons
SE	6.70393			7.0655	7.53786			9.54807	10.3688			4.58093	11.6272			Multiple Comparisons								10Ca-0Ca V2 Dunnett t (2-sided)
																10Ca-0Ca V1 Dunnett t (2-sided)								10Ca-0Ca V2	10Ca-0Ca V2	Mean Difference (I-J)	Std. Error	Sig.	95% Confidence Interval
	AtTPC1			VfTPC1				E605A/D606N				E457N/E605A/D606N				10Ca-0Ca V1	10Ca-0Ca V1	Mean Difference (I-J)	Std. Error	Sig.	95% Confidence Interval								Lower Bound	Upper Bound
	V2(10 Ca)-V2(0Ca)			V2(10 Ca)-V2(0Ca)	V2(50 Ca)-V2(0Ca)			V2(10 Ca)-V2(0Ca)	V2(50 Ca)-V2(0Ca)			V2(10 Ca)-V2(0Ca)	V2(50 Ca)-V2(0Ca)								Lower Bound	Upper Bound		AtTPC1 double	AtTPC1	-32.5723	5.821	9.08746e-05	-47.5501	-17.5945
	58.5445			31.7963	52.7472			43.4438	60.0055			29.4788	55.0284			AtTPC1 double	AtTPC1	-39.7001	10.4482	0.00389106	-66.584	-12.8162		VfTPC1	AtTPC1	-35.1631	5.57318	2.23585e-05	-49.5032	-20.8229
	57.7785			25.0172	46.5469			32.2712	70.2376			33.3801	72.0396			VfTPC1	AtTPC1	-54.5046	10.0034	0.000122278	-80.2439	-28.7652		AtTPC1 triple	AtTPC1	-25.4826	5.821	0.00113486	-40.4604	-10.5048
	48.3291			9.22753	38.4205			22.9232	63.3201			30.9776	65.1053			AtTPC1 triple	AtTPC1	-44.0137	10.4482	0.00161227	-70.8976	-17.1299
	68.3019			18.8957	45.9437			25.1144	53.2136			44.4734	57.0177											*. The mean difference is significant at the 0.05 level.
	72.2379			32.5568	46.3908			18.5784				39.4694				*. The mean difference is significant at the 0.05 level.
				37.7585	61.818
mean	61.0384			25.8754	48.6445			28.4662	61.6942			35.5558	62.2977
SE	4.22232			4.27205	3.22323			4.35049	3.54031			2.80592	3.91055
