# Supplementary material for: Vicia faba SV channel VfTPC1 is a hyperexcitable variant of plant vacuole Two Pore Channels
Source: eLife. 2023 Nov 22;12:e86384. doi: 10.7554/eLife.86384 (PMC10665017; doi:10.7554/eLife.86384)
Supplement: Figure 6—source data 1. [file elife-86384-fig6-data1.xlsx]

## Sheet: Tabelle1
	Figure 5—source data 1
	Amino acid sequences of plant TPC1 channels and their accession numbers.
family/species	TPC1 name	aa sequence	sequence length		Gene ID /data base
Brassicaceae
Arabidopsis halleri	AhTPC1	MEDPLIGRDSRGGGADRVRRSEAITHGTPFQKAAALVDLAEDGIGLPEQILDQSSFGESAKYYFIFTRFDLIWSLNYFALLFLNFFEQPLWCEKNPTPSCKDRDYYYLGELPYLTNAESIIYEVITLAILLVHTFFPISYEGSRIFWTSRLNLVKVACVVILFVDVLLDFLYLSPLAYDFLPFRIAPYVRVIIFILSIRELRDTLVLLSGMLVTYLNIVALWMLFLLFASWIAFVMFEDTQQGLTIFTSYGATLYQMFILFTTSNNPDVWIPAYKSSRWSSVFFVLYVLIGVYFVTNLILAVVYDSFKEQLAKQVSGMDQMKKRMLEKAFGLIDSDKNGEIDKNQCIKLFEQLTNYRTLPKISKEEFGLIFDELDDTRDFKINKDEFADLCQAIALRFQ…	732		Araha.9087s0002.1; Scaffold9087:1326..7148 reverse (Phytozome)
Alyssum linifolium	AliTPC1	MEDPLIGRDSRGGGTDRIVRRSEAITHGTPFQKAAALVDLAEDGIGLPEQILDQSSFGESAKYYFIFTRLDLIWSLNYFALLLLNFFEQPLWCEKQPTPSCKDRAYYYLGELPYLTNAESIIYEVVTLAILLVHTFFPISYEGSRIFWTSRLNLVKVACVVVLFVDVLVDFLYLSPLAFDFLPFRIAPYVRVIIFILSIRELRDSLILLSGMLGTYLNILALWMLFLLFASWIAFVMFEDTQQGLTIFTSYGATLYQMFILFTTSNNPDVWIPAYKSSRWSSLFFVLYVLIGVYFVTNLILAVVYDSFKEQLAKQVSGMDQMKRRMLEKAFGLIDTDKTGVIDKDQCIKLFEQLTNYRTLPKISKEEFGLIFDELDDTRDFKINKDEFADLCQAIALRF…	733		Gene ID: Alyli.0097s0214 (PAC:39169422); Genome: Alyssum linifolium v1.1 (Phytozome id: 472 • NCBI taxonomy id: 457770); location: Alys_scaffold97:1342604..1348411 reverse
Arabidopsis lyrata	AlyTPC1	MEDPLIGRDSRGGGADRVRRSEAITHGTPFQKAAALVDLAEDGIGLPEQILDQSSFGESAKYYFIFTRFDLIWSLNYFALLFLNFFEQPLWCEKNPTPSCKDRDYYYLGELPYLTNVESIIYEVITLAILLVHTFFPISYEGSRIFWTSRLNLVKVACVVILFVDVLLDFLYLSPLAYDFLPFRIAPYVRVILFILSIRELRHTLVLLSGMLGTYLNIVALWMLFLLFASWIAFVMFEDTQQGLTIFTSYGVTLYQMFILFTTSNNPDVWIPAYKSSRWSSVFFVLYVLIGVYFVTNLILAVIYDSFKEQLAKQVSGMDQMKRRMLEKAFGLIDSDKNGEIDKNQCIKLFEELNNYRTLPKISKEEFGLIFDELDDTRDFKINKDEFADLCQAIALRFQ…	732		XP_002874860 (NCBI)
Arabis nemorensis	AnTPC1	MEDPLIGRESRGGGTDRIVRRSEAIAHGTTFQKAAALVDLAEDGIGLPEQILDQSSFGESAKYYFIFTRLDVIWSLNYFALILINFLEQPLWCEKKPTPTCKDREYYYLGELPYLTNVESIIYEVITLVILLVHTFFPISYEGSRIFWTSRLNLVKVACVVILFVDVLVDILYLSPLAFDFLPFRIAPYVRVILFILSIRGLRDSLVLLSGMLGTYLNILALWMLFLLFASWIAFVMFEDTQQGLTLFTSYGATLYQMFILFTTSNNPDVWIPAYKSSRWSSLFFVLYVLIGVYFVTNLILAVVYDSFKEQLAKQVSGMDQMKRRMLEKAFGIIDTDKTGTIDKEQCIKLFEQLTNYRTLPKISKEEFGLIFDELDDTRDFKINKDEFADLCQAIALRF…	734		VVB07125.1 (NCBI)
Arabidopsis thaliana	AtTPC1	MEDPLIGRDSLGGGGTDRVRRSEAITHGTPFQKAAALVDLAEDGIGLPVEILDQSSFGESARYYFIFTRLDLIWSLNYFALLFLNFFEQPLWCEKNPKPSCKDRDYYYLGELPYLTNAESIIYEVITLAILLVHTFFPISYEGSRIFWTSRLNLVKVACVVILFVDVLVDFLYLSPLAFDFLPFRIAPYVRVIIFILSIRELRDTLVLLSGMLGTYLNILALWMLFLLFASWIAFVMFEDTQQGLTVFTSYGATLYQMFILFTTSNNPDVWIPAYKSSRWSSVFFVLYVLIGVYFVTNLILAVVYDSFKEQLAKQVSGMDQMKRRMLEKAFGLIDSDKNGEIDKNQCIKLFEQLTNYRTLPKISKEEFGLIFDELDDTRDFKINKDEFADLCQAIALRF…	733		NP_567258.1 (NCBI)
Brassica oleracea var. oleracea	BoTPC1	MEDPLIGRESRGGGGTDRIVRRSEAITHGTTFQKAAALVDLAEDGIGLPEQILDQSSFGESAKYYFFYTRLDLIWSLNYFALILINFFEQPLWCENKPTPSCKDRDYYYLGELPYLTNAESIIFEVVTLVILLVHTFFPISYEGSRIFWTSRLNLVKVACVVVLIVDVLVDILYLSPVAFDFLPFRIAPYVRVIIFILSIRELRDSLVLLSGMLGTYLNILALWMLFLLFASWIAFVMFEDTQQGLTVFTSYGATLYQMFILFTTSNNPDVWIRAYKSSRWSSLFFVLYVLIGVYFVTNLILAVVYDSFKEQLAKQVSGMDQMKRRMLEKAFALIDKDKTGQIDKEQCIKLFEQLTNYRTLPKISKEEFGLIFDELDDTRDFKINKDEFADLCQAIALR…	736		XP_013611388 (NCBI)
Brassica rapa FPsc	BrTPC	MEDPLIGRESRGGGTDRIVRRSEAITHGSTFQIAAALVDLAEDGIGLPEQILDQSSFGEAAKYYFIFTRLDLIWSLNYFALILLNFFEQPLWCENKPTPSCKDRDYYYLGELPYLTNAESIIFEVLTLLILLVHTFFPIIYEGSRIFWTSRLNLVKVACVVVLIVDVLVDFLYLSPLAFDFLPFRVAPYVRVIIFILSIRGLRDSLILLSGMLGTYLNILALWMLFLLFASWIAFVMFEDTKQGLTVFTSYGATLYQMFILFTTSNNPDVWIRAYKSSRWSSLFFVLYVLIGVYFVTNLILAVVYDSFKEQLAKQVIGMDQMKRRMLEKAFGLIDTDRTGEINKEQCIKLFEQLTNYRTLPKISKEEFGLIFDELDDTRDFKINKDEFADLCQAIALRF…	733		Brara.C02755.1; A03:14083319..14088521 reverse (Phytozome)
Boechera stricta	BsTPC1	MEDPLIGRDNRGRGTDRVRRSEAIAHGTPFQKAAALVDLAEDGIGLPEQILDQSSFGESIKYYFIFTRLDVIWSLNYFALLFLNFFEQPLWCEKNPKPSCKDRDYYYLGELPYLTNAESIIYEVITLAILLVHTFFPISYEGSRIFWTNRQNLVKVACVVVLFVDVLVDFLYLSPLAFDFLPFRIAPYVRVIVFILSIRELRATLVLLSGMLGTYLNILALWMLFLLFASWIAFVMFEDTQQGLTVFTSYGATLYQMFILFTTSNNPDVWIPAYKSSRWSSVFFVLYVLIGVYFVTNLILAVVYDSFKEQLAKQVSGMDQMKRRMLEKAFGFIDSDKNGEIDKNQCIKLFEQLTNYRTLPKISKEEFELIFDELDDTRDFKINKDEFADLCQAIALRFQ…	732		Bostr.2983s0086.1 (primary), Scaffold2983:486989..492810 reverse (Phytozome)
Capsella grandiflora	CgTPC1	MEDPLIGRDSRGGGTDRVRRSEAIAHGTPFQKAAALVDLAEDGIGLPEQILDQSSFGESAKYYFIFTRLDLIWSLNYFALLFLNFFEQPLWCENKPTPSCKDREYYYLGELPYLTNAESIIYEVITLAILLVHTFFPISYEGSRIFWTSRLNLVKVACVVVLFVDVLVDFLYLSPLAFDTLPFRVAPYVRVIIFILSIRELRDTLILLSGMLGTYLNILALWMLFLLFASWIAFVMFEDTQQGLTVFTSYGATLYQMFILFTTSNNPDVWIPAYKSSRWSSVFFVLYVLIGVYFVTNLILAVVYDSFKEQLAKQVSGMDQMKRRMLEKAFCLIDSDKNGEIDKDQCIKLFEQLTNYRTLPKISKEEFGLIFDELDDTRDFKINKDEFADLCQAIALRFQ…	732		Gene Identifier: Cagra.2369s0002 (PAC:28904050); Genome: Capsella grandiflora v1.1 (Phytozome id: 266 • NCBI taxonomy id: 264402); Transcript: Cagra.2369s0002.1; location: Scaffold2369:1006..6756 reverse (Phytozome)
Iberis amara	IaTPC1	MEDPLIGRESRKGGGTDRIFRRSEAITHGTTFQKAAALVDLAEDGIGLPEQILDQSSFGEAAKYYFIFTRLDLIWSLNYFALILLNFFEQPLWCEKKPTPSCKDKDYYYLGELPYLTNTESIIYEVITLVILLVHTFFPISYEGSRIFWTSRLNLVKVACAVILFVDVLVDFLYLSPLAFDYLPFRIAPYVRVIIFILSIRELRQSLVLLSGMLGTYLNILALWMLFLLFSSWIAFVMFEDTQQGLTVFYSYGATLYQMFILFTTSNNPDVWIPAYKSSRWSSLFFVLYVLIGVYFVTNLILAVVYDSFKEQLAKQVSGMDQMKRRMLEKAFGLIDKDKTGVIDKEQCIKLFEQLTNYRTLPKISKEEFGLIFDELDDTRDFKINKDEFADLCQAIALR…	704		Gene Identifier: Ibeam.5565s0001 (PAC:39757750); Genome: Iberis amara v1.1 (Phytozome id: 485 • NCBI taxonomy id: 190884); location: Iber_scaffold5565:24..4704 reverse (Phytozome)
Lepidium sativum	LeTPC1	MEDPLIGKESRGGGTDRIVRRSEAITHGTTFQKAAALVDLAEDGIGLPEQILDQSSFGESAKYYFVFTRLDLIWSLNYFALLFLNFFEQPLWCENNPTPSCKDRDYYYLGELPYLTNAESVIYEVITLAIVFVHTFFPISYEGSRIFWTSRLNLVKVACVVILLVDVVVDVLYLSPLAFNSLPFRIAPYVRVILFILSIRELRDSLILLSGMLGTYLNILALWMLFLLFASWIAFVMFEDTQQGITIFNSYGATLYQMFILFTTSNNPNVWIPAYKSTRWASVFFVLYVLIGVYFVTNLILAVVYDSFKEQLAKQVVGMDRMKRRMLEKAFALIDADKNGEIDKEQCIKLFEQLTNYRTLPNISKEDFGLIFDELDDTRDFKINKDEFADLCQAIALRF…	733		Gene Identifier: Lesat.0298s0352 (PAC:39476825); Genome: Lepidium sativum v1.1 (Phytozome id: 478 • NCBI taxonomy id: 33125); location: Lepi_scaffold298:1725682..1731480 forward (Phytozome)
Thlaspi arvense	TaTPC1	MEDPLIGRESRGGGTDRIVRRSEAITHGTTFQKAAALVDLAEDGIGLPEQILDQSSFGESAKYYFIFTRLDLIWSLNYFALILINFFEQPLWCENKPTPSCKDRDYYYLGELPYLTNAESIIYEVITLAILLVHTFSPISYEGSRIFWTSRLNLVKVACVVILFVDVVVDILYLSPLAFDFLPFRVAPYVRVIIFILSIRELRDSLVLLSGMLGTYLNILALWMLFLLFASWIAFVMFEDTQQGLTLFNSYGATLYQMFILFTTSNNPDVWIPAYKSSRWSSLFFVLYVLIGVYFVTNLILAVVYDSFKEQLAKQVSGMDRMKKRMLEKAFGLIDTDKTGVIDKEQCIKLFEQLTNYRTLPKISKEEFGLIFDELDDTRDFKINKDEFADLCQAIALRF…	734		Gene Identifier: Thlar.0023s0288 (PAC:39532835); Genome: Thlaspi arvense v1.1 (Phytozome id: 479 • NCBI taxonomy id: 13288); location: Thla_scaffold23:1304859..1310654 forward (Phytozome)
Fabaceae
Arachis ipaensis	AiTPC1	MEPLLRGEGSGGRRDHARGIFRRSDAITYGSNYEKAAALVDLAEDGVGLPEQILDSSSFQSSSRYYFIFIKCNIMWSLAYFALIVLNFLERPLWCENYTKPSCSDREYFFLGQLPYLTNAECLIYEGLTVVVLIIHTFFPISYEGSRIYWRNAINLLKVFCLLVLIADMLVYAIYLSPAAFDFLPFRVAPYIRVILFILNIRELRETITILSGMVGTYLNVLALGLLFLLFASWVAYVMFEDTIQGKTVFTSYGATLYQIFVLFTTSNNPDVWVPAYKASRWYCLYFIIFVLLGVYFVTNLVLAVVYDSFKSELVKQVFEMDRMRRAMLEKAFNLLDTHSTGYLNKDQCIRLFEELNKYRTLPKITKEEFELIFDELDDSRDVKLNKDEFADICHAIAL…	736		XP_016169924.1 (NCBI)
Bauhinia tomentosa	BtTPC1	MEPLLKGETSGRRERAAGIFRRSDALTYGSPYQKAAALVDLAEDGVGLPEQILDSSNFQSSARQYFIFTKFDIIWSLNYFALLLLNFLEKPLWCAKSTAYSCNDREYFFLGQLPYLTGVESLIYEGITLLVLIVHTFFPISYEGSRIYWKNAVSQFKVFCLLVLVADMLVYALYLSPVAFDSLPFRVSPYIRVLLFILNIRELRASIVILAGMLGTYLNVLALGLLFLLFASWVAYVMFEDTQQGKTIFTSYGATLYQMFVLFTTSNNPDVWIPAYKASRWYCLFFVLFVLLGVYFVTNLVLAVVYDSFKSELAKQVSEMDFMRRNMLEKAFILLTNNHDGHLNKDQCIKLFEELNMYRTLPKMSREEYELIFDELDDSHDVKINMDEFADLCNAIALK…	733		gnl|onekp|JETM_scaffold_2009139 (The 1,000 Plants Project)
Cicer arietinum	CaTPC1	MEPLLRGENSGPRNRSKRIFRRTDAFTYGSNYEKAAALVDLAEDGVGIPEQILDSSSFQSYARYYFMFTKCNLIWSLSYFALIVLNFLEKPLWCEKNTLHSCKDREYFFLGELPYLTAAECLIYEGIVLILLIIHTLWPLSYEGSQIYWKNAINLLKAFCLLVIIADMLVYALYMSPLAFDYLPFRIAPYVRVILFVLNIRELRETIIILVGMLDTYLNILALGLLFLVFASWVAYVIFEDTIQGKTVFTSYSATLYQMFLLFATANNPDVWVPAYKSSRWHCLFFILFVLVGVYFVTNLILAVVYDSFKSELVKRVSEMDRMRITMLEKAFKLLDTHNVGCLNKDQCIGLFEEVNKYRTLPKISKEEFELIFDELDDTHDVKINKDEFADICNAIALK…	735		XP_004487279.1 (NCBI)
Copaifera officianalis	CoTPC1	RRRRSDAITFGTPYERAAALVDLAEDGVGLPEQILQTSSFQRSARYYFIFTKCDLIWSLAYFALIVLNFFEKPLWCAKSGADSCKNREYFFLGQLLYLTGAECLIYEGITILVLVIHAFFPLSYEGSRIYWRNTVNQLRVFCLILLVADMLVYSLYLSPVGFHYLPFRIAPYVRVILFTLNFRELRSSMVILVGMLDTYLNVLALGLLFLLFSSWVGYVMFEDTPQGETVFTSYGTTLYQMFVLFTTSNNPDVWIPAYKASRWFCLFFVLFVLLGVYFVTNLVLAVVYDSFKNELAKQVFEMDRMRRHMLEKAFNLLDSNHDGYLDKDQCIKLFEELNKYRSLPKISKEESELIFDELDDTHDFKINMDEFADLCNAIALKFQKEEIPSYFEYLSFYHS…	710		gnl|onekp|RKLL_scaffold_2067695 (The 1,000 Plants Project)
Glycine max	GmTPC1	MEQSLLRGESSDQSNRSRGIFRRSDAITYGSNYEKAAAFIDLAEDGVGLPEEILDSPNFQNYIRFYFIFNKCNLIWSLSYFALIVLNFLEKPLWCKKLTTNSCNDREYFYLGQLPYLTDAECLIYEGITLVLLIIHTFFPLSYEGSHIYWKNTINQLKVFSLLVLVADVLLYALFLSPLAFDFLPFRIAPYIRVVLFVLNIRELRETITILVGMLDTYLNVLALWLLFLLFASWVAYVFFEDTIQGKTVFTSYGTTLYQLFLLFTTSNNPDVWVPAYKSSRWYCLFFVLFVLVGVYFVTNLILAVVYDSFKSELVKQVFEKDRLRRTMLDKAFDLLDTHKVSSLNKNQCIRLFEELNKYRTLPKISREDFELIFDELDDSHDIKINKDEFADICNAIAL…	738		Glyma.13G296900.1 (primary); Chr13:39576148..39594946 reverse (Phytozome) (Glycine max Wm82.a2.v1 proteome)
Lupinus albus	LaTPC1	MEPLLRGENSGRRDRPRGLRRRSDALTYGSNYEKAAALVDLAEDGVGLPEQILDSSSFQSYAKFYFIFTKFDLIWSLSYFALIVLNFLEKPLWCENNTTHSCKDREYFFLGELPYLTAVECIIYEGTILFLIIIHTFFPISYEGSHIYWKNTTSQLKVFCVLVLVADMLVYALYSSPLAFDFLPFRIAPYIRVVLFVLNVRGLRETIIILAGMLGTYLNVLALGLLFLLFASWVAYVMFEDTIQGKTVFTSYGTTLYQIFILFTTSNNPDVWVPAYKASRWYCLFFILFVLLGVYFVTNLVLAVVYDSFKGELVKQVSETDRMRRTMLEKAFDFLDTNNVRYLNKDQCIRLFEELNKYRTLPNISREEFELIFDELDDTHDVKINKDEFADICNAIALK…	738		Gene Identifier: Lalb_Chr22g0356561 (PAC:44538810); Lupinus albus v1 (Phytozome id: 567 • NCBI taxonomy id: 3870); location: Lalb_Chr22:4384027..4405063 forward
Lotus japonicus	LjTPC1	MEPLLRGESSGRRLGPRQRGGVFGRADAIAYGSNYEKAAALIDLAEDGVGIPEKILDSSSFQSSARFYFKFTKCDLIWSLSYFALIVLNFLEKPLWCQNSAHSCKDREYFFLGQLPYLTPAECLIYEGITLVLLIIHTFFPLSYEGSRLYWTNAINLLKAFCLLALVADMLVYALYMSPLAFGFLPFRIAPYIRVVLFVLNIRELRDTIIVLVGMLDTYFNILALWFLFLVFSSWVAYVIFEDTIQGNTVFTSYVTTLYQMFLLFATANNPDVWVPAYKSSRWSILFFILFVLVGVYFVTNLILAVVYDSFRGELVKQVSEMDRRRRAMLGKAFDLLDTHNAGLLNKDQCIRLFEELNKYRTLPNISREEFELIFDELDDSHDVKINKDEFADICNAIS…	737		Lj3g0012901 ( PAC:44921970); chr3:13660207..13682615 reverse; (Phytozome id: 571 • NCBI taxonomy id: 34305)
Lathyrus sativus	LsTPC1	MTEPLLRGESSGLRNRSRGIVRRTDAITYGSNYEKAAALIDLAEDGVGIPEQLLDSSNFQSYSRFYFMFTKCDLIWSLSYFALIVLNFLEKPLWCEKNTAHSCNDRDYFFLGQLPYLTAAQCIIYEGIVLVLLIIHTLWPLSYEGPHIYWKSPINLLKALCLLVILADMLVYALYMSPVAFDFLPFRIAPYIRVVLFVLNIRELRETTIILAGMLDTYLNILALGLLFLVFASWVAYVIFEDTIQGKTVFTSYTTTLYQMFLLFTTANNPDVWVPAYKASRWSCIFFILFVLVGVYFVTNLILAVVYDSFKSELVKQVFKMDRMRRAMLERAFNLLDTYNVGYLNKDQIIRLFEEVNKYRTLPKISKEEFELIFEELDDTHDVKINKDEFADICNAIAL…	728		gnl|onekp|KNMB_scaffold_2001631 (The 1,000 Plants Project)
Medicago truncatula	MtTPC	MEPLLRGESSGGLRNRSRGIVRRSDAITYGSNYEKAAALIDLAEDGVGIPEQLLDSSDFQSYSKFYFWFTKFDLLWSLSYFALIVLNFLEKPLWCEKNATHSCQDREYYFLGELPYLTAAECIIYEGICLVLLSIHTFWPLSYEGSRIYWRSPINLLKAFCLLVILADMLVYALYMSPVAFDFLPFRIAPYIRVVLFVLNIRELRETVVIVAGMLDTYLNILALGLLFLVFASWVAYVIFEDTIQGKTVFTSFSATLYQMFLLFNTANNPDVWVPAYKSSRSSILFFVLFVLIGVYFVTNLILAVVYDSFKSELVKQVSEMDRMRRAMLEKAFNLLDTHKIGYLNKDQCIRLFEEVNKYRTLPKISKEEFGLIFDELDDTHDVKINKDEFADICNAIAL…	737		XP_013465101.1 (NCBI)
Phaseolus lunatus	PlTPC1	MEQSLLRGESSGLSYRRRGPFRRSDAITYGSNYEKAAALIDLAEDGVGLPVQILDSSNFQNYARFYFIFTKFNLIWSLGYFALIVLNFLEKPLWCKKLVTHSCNDREYFYLGQLPYLTDAECLTYEGITLLLLIIHTFFPLSYEGSRIYWKSTINQLKVFCLLVLVADTLLYAFYLSPLAFDFLPFRIAPYIRVVLFVLNIRELRETVIILVGMLDTYLNVLALGLLFLLFASWVAYVFFEDTIQGKTVFTSYGTTLYQMFLLFTTSNNPDVWVPAYKSSRWYALFFVLFVLVGVYFVTNLILAVVYDSFKSELVKQVFEKDLQRRTVLEKAFNLLDTHNIGALNKNQCIRLFEELNKYRTLPKISSEEFELIFDELDDSHDIKINKDEFADICNAIAL…	737		Gene ID: Pl04G0000294700.v1 (PAC:44356066); Genome: Phaseolus lunatus V1 (Phytozome id: 563 • NCBI taxonomy id: 3884); location: Pl04:41160552..41205081 reverse; Phytozome
Phaseolus vulgaris	PvTPC1	MEQSLLRGESSGLSYRRRGPFRRSDALTYGSNYEKAAALIDLAEDGVGLPVQILDSSNFQNYARFYFIFTKFNLIWSLGYFALIVLNFLEKPLWCKKLVTHSCNEREYFYLGQLPYLTDAECLTYEGITLLLLIIHTFFPLSYEGFRIYWKSTINQLKVFCLLVLVADTLLYAFYLSPLAFDFLPFRIAPYIRVVLFVLNIRELRETVVILVGMLDTYLNVLALGLLFLLFASWVAYVFFEDTIQGKTVFTSYGTTLYQMFLLFTTSNNPDVWVPAYKSSRWYALFFVLFVLVGVYFVTNLILAVVYDSFKSELVKQVFEKDLLRRTMLEKAFDLLDTHNIGALNKNQCIRLFEELNKYRTLPKISSEEFELIFDELDDSHDIKINKDEFADICNAIAL…	737		Phvul.004G108300.1 (primary); Chr04:37655239..37684454 reverse (Phytozome)
Trifolium pratense	TpTPC1	MEPLLGGESSGIRNRSRGGRVHRTDAITYGSNYEKAAALIDLAEDGVGIPEQLLESSSFQSYSRYYFMFTKLDLLWSLCYFALIVLNFLEKPLWCEKTTHSCNDREYFFLGQLPYLTAAECIIYEGIILVLLSIHTFWPLSYEGPPIFWKSPINLLKAFCLLVILVDMLAYALYISPVAFNFLPFRIAPYIRVVLFVLNIRELRETVIIVTGMLDTYLNILALGLLFLVFASWIAYVIFEDTIQGKTVFTSYSATLYQMFLLFNTANNPDVWVPAYKSSRWSILFFILFVLIGVYFVTNLILAVVYDSFKSELVKQVSEMDRLRRAMLEKAFNLLDTNNDGYLKKDQCIRLFEEVNKYRTLPKISKEEFELIFDELDDTHDVKINKDEFADICNAIALR…	736		Tp57577_TGAC_v2_mRNA6650 (primary); Tp57577_TGAC_v2_LG7:30101605..30119935 reverse (PHYTOZOME)
Vicia faba	VfTPC1	MTEPLLRGESSGLRNRSRGIVRRTDAITYGSNYEKAAALIDLAEDGVGIPEQLLDSSNFQSYSRFYFIFTKFDLIWSLSYFALIVLNFLEKPLWCEKNTMHSCNDREYFFLGQLPYLTAAQCIIYEGIVLVLLIIHTFWPLSYEGPHIYWKSPINLLKALCLLVILADMLVYALYMSPVAFDFLPFRIAPYIRVVLFVLNIRELRETTIILAGMLDTYLNILALGLLFLVFTSWVAYVIFEDTIQGKTVFTSYTTTLYQMFLLFTTANNPDVWVPAYKASRLSCIFFILFVLVGVYFVTNLILAVVYESFKSELVKQVFEMDRMRRAMLERAFNLLDTYNVGYLNKDQIIRLFEEVNNYRTLPKISKEEFELIFEELDDTHDVKINKDEFADICNAIAL…	736		Genbank: BankIt2410619 VfTPC1_mRNA MW380418
Vigna unguiculata	VuTPC1	MEQSLLRGESSGLGSRRRGLFRRSDAITHGSNYEKAAALIDLAEDGVGLPEQILDSSNFQNYARFYFVFTKFNLIWSLSYFALIVLNFLEKPLWCKKLATQSCNDREYFYLGQLPYLTDAECLIYEGITLLVIIIHTFFPLSYEGSRIYWKNAFNQFKVFCLLVLVADTLLYVFYLSPLAFDFLPFRIAPYVRVVLFVLNIRELRETITILFGMLDTYLNVLALGLLFLVFASWVAYVFFEDTIQGKTVFTSYGATLYQMFLLFTTSNNPDVWVPAYKSSRWYCLFFVLFVLVGVYFVTNLILAVVYDSFKSELVKQVFEKDLLRRTMLEKAFNLLDTLNIGALNKNQCIRLFEELNKYRTLPKISSEEFELIFDELDDSHDIKINKDEFADICNAIAL…	737		VuZN016.04G125700 (PAC:44127068). (( VuZN016.04G125700 (PAC:44127068) ; chr4:29594433..29623509 reverse (Phytozome id: 559 • NCBI taxonomy id: 3917))
Poaceae
Hordeum vulgare	HvTPC1	MSEAQAPLITEEAAERGLASSGSRRLSDGGGGQGSRKYRRRSDALAHGDRYQKAAALVDLAEDGVGIPEDVLNDTRFGRAMSFYFVYLRLDWLWSLNIFALILLNFLEKPLWCRKDALHACDQRDMYFLGQLPYFSKTESLIYEGLTLVILVMEILCPLSYEGLNIFWRSTTNKLKILLLFILACDILVFAFSSQPFRLAPYIRVVFLIMTIRELRMCAITLAGLIGTYLNVLALSLLFLLFASWLAYVTFEDTPQGKTIFSSYGVTLYQMFVLFTTSNNPDVWVPAYKISRWYSLFFIVYVLLGVYFLTNLILAVIYDSFKEQFAKQLVQVDAIRKNILQKAFDLIDTNTRGYLDREQCISLLNELNKYRSLPKTSREDFELIFAELDRSGDFKVTSE…	742		XP_044976651 (NCBI)
Oryza sativa	OsTPC1	MRERGEMREAKAPLIAEAAEHISHSHGSGSSGTGSHTSGGGGGWRGSRQYQRRSDALAYGNRYQKAAALVDLAEDGVGIPEDVLNDTRFERAMRFYFVYLRLDWLWSLNLFALILLNFLEKPLWCRGYSQHACDQRDLYFLGQLPYLSKTESLIYEGLTLVILVMDIFYPLSYEGLNLFWKNTINKLKVLLLFILACDILVFAFSPQPFRVAPYIRVAFLIMNIRELRMCAVTLVGMVGTYLNVLALSLLFLLFASWLAYVTFEDTPQGKTVFSSYGTTLYQMFILFTTSNNPDVWVPAYKSSRWSSLFFIVYVLLGVYFLTNLILAVIYDSFKEQLAKQVSQADCTRKSILEKAFGIIDATGQGYLNKEQCLSLLDELNKYRSLPKTSREDFELIFAE…	757		BAD73469.1 (GenBank)
Sorghum bicolar	SbTPC1	MAEVEAPLIAEVEGEEGLGGFRGGSASAGGGRSGLGNGVRGARQYHRRSDALAYGDRYQKAAALVDLAEDGVGIPEDVLNDTRFERAMRFYFVYLRLDWLWSLNLFALILLNFLEKPLWCQKYATHTCDQRDLYFLGQLPYLSKTESLIYEVLTLVILVLDIFYPLSYEGLNIFWKNSMNKLKVLLLFILACDILVFMLNPGPFRVAPYIRVVFLIMTIRELRMCAVTLVGIVGTYLNVLALSLLFLLFASWLAYVTFEDTPQGKIIFTSYGTTLYQMFVLFTTSNNPDVWVPAYKSSRWNALFIVIYVLLGVYFLTNLILAVIYDSFKEQLAKQVAQMDSIRKSILQKAFDLIDTNGQGYLNKEQCISLLDELNKYRSLPKTSKEDFELIFAELDRSG…	751		XP_002458314.1 (NCBI)
Zea mays	ZmTPC1	MTEVEAPLITEVEEAEGRGFRGSASAGGARSGLGSGVRGTRQYHRRSDALAYGDRYQKAAALVDLAEDGVGIPEDVLNDTRFERAMRFYFVYLRLDWLWSLNLFALILLNFLEKPLWCQKYAPHTCDQRDLYFLGQLPYLSKTESLIYEALTLVILVLDIFYPLSYEGLNLFWKNSMNKLKVLLLFILACDILVFMLSSGPFRVAPYIRVVFLIMTIRELRMCAVTLVGIVGTYLNVLALSLLFLLFASWLAYVTFEDTPQGKTIFTSYGTTLYQMFVLFTTSNNPDVWVPAYKSSRWNALFIVIYVLLGVYFLTNLILAVIYDSFKEQLAKQLAQMDSIRKSILQKAFDLIDTNGQGYLNKEQCISLLDELNKYRSLPKTSREDFELIFSELDRSGDF…	749		ACG26617.1 (GenBank)
Funariaceae
Physcomitrella patens	PpTPC1a	MEDPLLPTGSGLRRRGESSSSGGFESTGLNNVIVGRRGDAITRGDKYQKAAAMVDQAEDGVGLPPEVLEQSNFEEAAKYYFAYISLDFLWELNLAALLLLNFFEVPLWCKESFPTPCGDREKFFLGGLPYLTRHQSLITEVVVLLILGVHTFFPIAFTGNKLFWRNNLNLLRVSFFLVLALDTVVNAIYIIPTGFIFSLPFRLAPYLRVAVVILNTRGLRNCVKTLAGIIPDFADIAALLGLYLLFSSWLAYVMFEDTVQGKTTFTSYSTTLYQMAILFTTSNSPDVWLDAYKSSRFYSLFFILYILIGVYFFMNLVLAVVYDSFKGQLAKLLLNEANERQQVLGAAFNLLDEQKRGFLDKLQCARLFKELNKYRSLPKIADDDMEAVFCALDDSGDFR…	752		Gene Identifier: Pp3c1_6270 (PAC:32970778), Transcript: Pp3c1_6270V3.1 (Phytozome )
