# Supplementary material for: Vicia faba SV channel VfTPC1 is a hyperexcitable variant of plant vacuole Two Pore Channels
Source: eLife. 2023 Nov 22;12:e86384. doi: 10.7554/eLife.86384 (PMC10665017; doi:10.7554/eLife.86384)
Supplement: Figure 7—source data 1. [file elife-86384-fig7-data1.xlsx]

## Sheet: Iss_Cm
VfTPC1_triple Iss/Cm (pA/PF)
	0 mM Ca												10 mM Ca
Voltage(mV)	Exp 1	Exp 2	Exp 3	Exp 4	Exp 5	Exp 6	Exp 7	Exp 8	Mean	SEM			Exp 1	Exp 2	Exp 3	Exp 4	Exp 5	Mean	SEM
-80	-6.71106	-6.99199	-6.44543	-10.2131	-15.8	-6.00112	-6.82498	-5.30953	-8.03715	1.22062			-5.47694	-6.87113	-9.97614	-5.02119	-8.81119	-7.23132	0.9519
-70	-6.99214	-6.99991	-5.22006	-8.93493	-13.8592	-4.21892	-4.7953	-6.50445	-7.19061	1.08981			-4.59118	-4.91213	-7.97499	-3.51024	-4.64	-5.12571	0.751513
-60	-8.09348	-7.48796	-4.40421	-5.84694	-12.0283	-3.527	-4.32852	-9.02301	-6.84242	1.01663			-4.06879	-3.72372	-6.74554	-2.98499	-2.23006	-3.95062	0.767131
-50	-10.597	-9.35165	-4.13553	-6.7456	-10.266	-3.22698	-4.05995	-13.912	-7.78683	1.35691			-3.67483	-3.19826	-5.965	-2.89121	-1.02479	-3.35082	0.793215
-40	-15.0223	-12.1961	-3.688	-6.4808	-9.13221	-2.93931	-4.10624	-23.63	-9.64937	2.50859			-3.41874	-3.03495	-5.25906	-2.83062	-0.617267	-3.03213	0.740975
-30	-20.3698	-18.7821	-3.48792	-6.98241	-8.06413	-2.88116	-5.10852	-36.0458	-12.7152	4.08379			-3.21402	-2.67037	-5.0811	-2.71706	-0.499211	-2.83635	0.730943
-20	-24.3865	-26.8879	-3.45158	-11.9513	-8.57759	-2.86936	-6.98199	-42.3905	-15.9371	4.94251			-3.10108	-2.65576	-4.62919	-2.60881	-0.38301	-2.67557	0.680381
-10	-22.519	-26.7006	-3.53855	-21.4505	-9.93886	-2.82188	-11.4502	-26.8139	-15.6542	3.50785			-3.00891	-2.46057	-4.32569	-2.56613	-0.293491	-2.53096	0.65046
0	-5.08247	-1.32963	-3.28498	-17.1605	-11.9759	-2.70586	-11.3662	10.4194	-5.31077	2.97531			-2.95603	-2.51582	-3.83686	-2.60211	-0.212727	-2.42471	0.600379
10	32.7137	47.3856	-0.868103	23.0312	4.82025	-0.247494	12.9644	63.1014	22.8626	8.27899			-2.66518	-1.89325	-3.03271	-2.09057	-0.0873567	-1.95381	0.508729
20	87.7102	118.363	7.73778	83.7606	49.5644	12.4326	57.0899	123.693	67.5439	15.4986			-1.08745	1.62042	0.570064	0.53413	0.0723166	0.341896	0.438142
30	155.759	191.813	28.8192	152.035	107.525	42.8876	109.523	188.804	122.146	21.8293			5.62649	14.1453	14.8593	12.6806	0.470469	9.55643	2.80123
40	233.034	268.052	63.7939	223.484	173.21	88.2451	165.744	254.804	183.796	26.7626			29.2676	45.3075	52.739	39.9206	1.67636	33.7822	8.89112
50	314.156	343.027	110.317	293.97	241.332	148.06	224.142	322.868	249.734	30.0771			74.6843	97.4933	114.053	84.1638	6.93776	75.4665	18.3665
60	397.289	417.384	162.834	365.784	310.146	212.44	284.819	391.175	317.734	32.7826			137.422	153.945	189.428	136.032	18.7415	127.114	28.7518
70	484.939	495.362	209.948	437.141	380.535	278.518	345.064	459.613	386.39	36.3598			213.242	220.274	279.288	194.703	38.9184	189.285	40.1711
80	572.483	575.654	246.313	508.062	452.38	347.93	404.402	529.112	454.542	41.0242			292.814	294.33	370.554	253.651	68.562	255.982	50.5399
90	663.003	655.154	311.465	580.329	523.187	416.552	465.394	600.475	526.945	43.4304			383.315	365.77	472.675	321.736	105.825	329.864	61.1558
100	755.847	738.261	367.757	653.196	595.404	489.136	525.319	673.892	599.852	46.9651			470.185	442.921	569.655	384.137	140.762	401.532	71.7618
110	848.685	822.687	441.646	727.293	667.291	565.913	584.566	747.345	675.678	49.0143			569.493	523.358	682.466	453.018	183.263	482.32	83.557

## Sheet: G_Gmax
VfTPC1_triple G/Gmax
	0 mM Ca												10 mM Ca
Voltage(mV)	Exp 1	Exp 2	Exp 3	Exp 4	Exp 5	Exp 6	Exp 7	Exp 8	Mean	SEM			Exp 1	Exp 2	Exp 3	Exp 4	Exp 5	Mean	SEM
-80	-0.000675341	6.20598e-06	0.000718365	0.00015116	0	0	0	-0.0020664	-0.000233251	0.000293677			-0.000451302	-0.000396036	-0.00027341	9.22491e-05	0.00530701	0.000855703	0.00111685
-70	0.00135068	0.00021606	-0.000297836	0.000838362	0	0	0	-0.00163312	5.92682e-05	0.000307686			0	-0.000354348	-0.000243024	-0.000184498	0.00381717	0.00060706	0.000804576
-60	-0.000675341	-6.97046e-05	0.000729759	0	0.00398073	0.00100065	0.000140383	-0.00166645	0.000430003	0.000584907			0	0	0	9.22491e-05	0.0030139	0.000621229	0.000598433
-50	0.00283784	-0.000533596	0.000306464	0	0.018544	0.00657327	0.00287025	-0.00134982	0.00365604	0.00230932			0.000765249	0	0	0.000667037	0.0020708	0.000700618	0.000378447
-40	0.00491848	0.000381034	0.0025325	-0.000371067	0.0594159	0.015694	0.0113251	0	0.011737	0.00711342			0.000824115	0.000656587	-0.00045563	0.00130569	0.000250374	0.000516228	0.000296052
-30	0.0126851	0.00119486	0.00607067	-2.74578e-05	0.138511	0.0375753	0.0439745	0	0.029998	0.0166536			0.000961467	0.000521101	0.000729057	0.00208805	3.19485e-05	0.000866324	0.000341751
-20	0.0521423	0.00994647	0.0255048	0.0016219	0.290506	0.0815421	0.122439	0.000783232	0.0730608	0.0345385			0.00164823	0.00161541	0.000729057	0.00275864	2.96664e-05	0.0013562	0.000462185
-10	0.182633	0.0396072	0.0837454	0.006336	0.454513	0.159969	0.273081	0.00348288	0.150421	0.0547271			0.00186407	0.00141739	0.00224787	0.00394012	-0.000468469	0.0018002	0.000709828
0	0.460617	0.179877	0.269318	0.0130018	0.609452	0.256637	0.47667	0.0110486	0.284578	0.0772265			0.00439528	0.00650334	0.00373623	0.00648942	-7.65887e-05	0.00420954	0.001206
10	0.671373	0.447777	0.493508	0.0417405	0.716959	0.385922	0.613804	0.0460773	0.427145	0.0924623			0.00584729	0.0114224	0.00647012	0.0146856	0.000353392	0.00775576	0.00246533
20	0.789629	0.630902	0.652348	0.109127	0.802389	0.498627	0.751562	0.120401	0.544373	0.100007			0.0185426	0.0428657	0.0260626	0.0409502	0.000236681	0.0257316	0.00783251
30	0.851844	0.731925	0.75217	0.226102	0.862604	0.590018	0.819887	0.241635	0.634523	0.0925903			0.0533712	0.111026	0.0731754	0.0999298	0.000857374	0.0676719	0.0195181
40	0.891393	0.806339	0.809477	0.364023	0.882394	0.676496	0.868666	0.368335	0.70839	0.0784347			0.140178	0.238591	0.169345	0.213393	0.0062205	0.153545	0.0405878
50	0.915688	0.850729	0.858331	0.496569	0.919637	0.742071	0.893219	0.486954	0.7704	0.0639163			0.271958	0.375756	0.273019	0.335178	0.0229628	0.255775	0.0614252
60	0.933248	0.885277	0.894924	0.596584	0.931943	0.785924	0.909567	0.577725	0.814399	0.0522315			0.38655	0.478933	0.381612	0.441993	0.0572379	0.349265	0.0752093
70	0.948579	0.913954	0.922306	0.660673	0.94938	0.826366	0.927944	0.665796	0.851875	0.0433619			0.48554	0.584247	0.476475	0.535471	0.103935	0.437133	0.0855058
80	0.959038	0.935204	0.936592	0.682868	0.94889	0.852909	0.936023	0.712758	0.870535	0.0394673			0.579372	0.661121	0.561011	0.617452	0.160015	0.515794	0.0905869
90	0.973408	0.950631	0.951447	0.755121	0.957495	0.894443	0.948348	0.770884	0.900222	0.0310338			0.653366	0.721661	0.63364	0.680951	0.24249	0.586422	0.0872427
100	0.986911	0.968958	0.963008	0.809107	0.962345	0.913799	0.966754	0.818094	0.923622	0.0251134			0.715764	0.772052	0.69342	0.743151	0.310547	0.646987	0.0851373
110	0.999187	0.983003	0.973522	0.898223	0.967069	0.948782	0.989436	0.86597	0.953149	0.0166757			0.767152	0.822724	0.755265	0.793796	0.366016	0.70099	0.0845467

## Sheet: The midpoint voltage V1 V2
VfTPC1_triple
		V1 values (mV)		V2 values (mV)		V1(10 Ca-0Ca)(mV)	V2(10 Ca-0Ca)(mV)			V1 values at 0 mM Ca
		0 mM Ca	10 mM Ca	0 mM Ca	10 mM Ca									t-test for Equality of Means
		-3.74882	95.591	6.06042	60.2425	91.3945	51.9733									95% Confidence Interval of the Difference
		29.7979	82.6258	22.9947	48.8623	78.4293	40.5931				t	df	P value	Mean Difference	Std. Error Difference	Lower	Upper
		-33.9164	67.8016	5.45509	38.4015	63.6051	30.1323			VfTPC1 triple vs VfTPC1	0.522	11	0.612	7.74521	14.8478	-24.9345	40.4249
		7.87681	64.9249	9.02073	51.0791	60.7284	42.8099
		-17.2809	55.6226	-13.5485	37.4655	51.4261	29.1963			V2 values at 0 mM Ca
		24.1882		15.6644										t-test for Equality of Means
		-11.4394		-5.5009												95% Confidence Interval of the Difference
		38.0944		26.0077							t	df	P value	Mean Difference	Std. Error Difference	Lower	Upper
										VfTPC1 triple vs VfTPC1	-0.508	11	0.621	-3.34972	6.5911	-17.8566	11.1572
	mean	4.19647	73.3132	8.2692	47.2102	69.1167	38.941
	SE	8.90344	7.05947	4.75315	4.24318	7.05947	4.24318			V1(10 Ca-0Ca)
														t-test for Equality of Means
																95% Confidence Interval of the Difference
											t	df	P value	Mean Difference	Std. Error Difference	Lower	Upper
										VfTPC1 triple vs VfTPC1	0.837	9	0.424	8.43633	10.0807	-14.3679	31.2406
										V2(10 Ca-0Ca)
														t-test for Equality of Means
																95% Confidence Interval of the Difference
											t	df	P value	Mean Difference	Std. Error Difference	Lower	Upper
										VfTPC1 triple vs VfTPC1	2.148	9	0.06	13.0622	6.08017	-0.6921	26.8165
