# Supplementary material for: Vicia faba SV channel VfTPC1 is a hyperexcitable variant of plant vacuole Two Pore Channels
Source: eLife. 2023 Nov 22;12:e86384. doi: 10.7554/eLife.86384 (PMC10665017; doi:10.7554/eLife.86384)
Supplement: Figure 11—source data 1. [file elife-86384-fig11-data1.xlsx]

## Sheet: current amplitude
			single channel current amplitude（pA）
		voltage（mV）
AtTPC1	Exp 1	20	1.298
		25	1.85992
		30	2.3872
		10	0.624791
	Exp 2	20	1.45286
		25	1.72074
		30	2.22759
	Exp 3	25	1.74056
		30	2.10714
		35	2.4625
E605A/D606N	Exp 1	10	1.1133
		20	1.7377
		25	2.08785
		30	2.60381
	Exp 2	20	1.63479
		10	0.8865
		25	2.20659
		30	2.41094
	Exp 3	15	1.33132
		20	1.70244
		25	2.3108
		30	2.33314
VfTPC1	Exp 1	15	2.94984
		20	4.18735
		25	5.63913
		30	6.73138
	Exp 2	15	2.91208
		20	3.8503
		25	5.69073
		30	6.7072
		35	7.54444
		40	8.9082
		10	1.7551
	Exp 3	10	2.92249
		20	5.01739
		30	7.61277
		25	6.38642

## Sheet: Single channel conductance_x0009_
		Single channel conductance(pS)
		AtTPC1	E605A/D606N	VfTPC1
	Exp 1	87.823	72.759	255.93
	Exp 2	77.473	79.332	239.86
	Exp 3	72.194	72.272	235.02
	mean	79.1633	74.7877	243.603
	SE	4.59018	2.27651	6.31972
