# Supplementary material for: Vicia faba SV channel VfTPC1 is a hyperexcitable variant of plant vacuole Two Pore Channels
Source: eLife. 2023 Nov 22;12:e86384. doi: 10.7554/eLife.86384 (PMC10665017; doi:10.7554/eLife.86384)
Supplement: Figure 12—source data 2. [file elife-86384-fig12-data2.xlsx]

## Sheet: stimulus peak and plateau
AtTPC1		stimulus peak (mV)
	current (pA)	Exp 1	Exp 2	Exp 3	Exp 4	Exp 5	Exp 6	Mean	SE
	10	6	4.3	-2	0	-6	3	0.883333	1.81483
	30	11	21	17	2	30	20	16.8333	3.89373
	70	22	35	34	42	50	38	36.8333	3.79839
	150	38	55	59	65	81	69	61.1667	5.91279
	300	60	79	90	95	117	107	91.3333	8.27312
	500	84	107	121	123	149	149	122.167	10.2125
	1000	131	158	176	174	199	205	173.833	11.0978
		stimulus plateau (mV)
		Exp 1	Exp 2	Exp 3	Exp 4	Exp 5	Exp 6	Mean	SE
	10	6	4.3	-2	0	-6	3	0.883333	1.81483
	30	8	21	17	2	30	13	15.1667	4.02837
	70	10	29	18	34	31	14	22.6667	4.06339
	150	12	31	18	34	29	16.1	23.35	3.71427
	300	15	36	21	34	29	16.4	25.2333	3.68616
	500	16	39	23	37	29	17	26.8333	4.02009
	1000	19	44	28	39	30	18.4	29.7333	4.22742
VfTPC1		stimulus peak (mV)
		Exp 1	Exp 2	Exp 3	Exp 4	Exp 5	Exp 6	Mean	SE
	10	4.5	2	2	1.7	0	3	2.2	0.608276
	30	6.5	2.7	6	3.2	9	8	5.9	1.0315
	70	10	3.1	10	7.2	23	18	11.8833	2.98423
	150	20	17	24	15	39	33	24.6667	3.87011
	300	31	27	42	40	67	56	43.8333	6.19363
	500	45.6	35	58	61	95	74	61.4333	8.65262
	1000	77	58	100	109	134	117	99.1667	11.2766
		stimulus plateau (mV)
		Exp 1	Exp 2	Exp 3	Exp 4	Exp 5	Exp 6	Mean	SE
	10	4.5	2	2	1.5	0	3	2.16667	0.614636
	30	4.6	2.3	2.3	2.1	6	4.5	3.63333	0.663157
	70	4.5	2.4	2.4	3	8	5.5	4.3	0.895917
	150	5.5	8	2.5	4.5	10	7.9	6.4	1.11654
	300	6.3	9	3.9	9.5	13	11.5	8.86667	1.36251
	500	7	11	4	13	17	13.7	10.95	1.93455
	1000	10	14	6.7	19	19	16.3	14.1667	2.03645
E605A/D606N/E457N		stimulus peak (mV)
		Exp 1	Exp 2	Exp 3	Exp 4	Exp 5	Exp 6	Mean	SE
	10	0	0	6	5	2	5	3	1.09545
	30	0.6	0.1	10	12	6	6.3	5.83333	1.96548
	70	4.7	7	17	22	19	19	14.7833	2.91438
	150	14.2	16	32	44	42	34	30.3667	5.17955
	300	30.3	35	54	74	64	77	55.7167	8.02913
	500	56	50	85	107	97	104	83.1667	10.0579
	1000	94	86	142	164	148	179	135.5	15.3574
		stimulus plateau (mV)
		Exp 1	Exp 2	Exp 3	Exp 4	Exp 5	Exp 6	Mean	SE
	10	0	0	6	5	1.3	1.1	2.23333	1.06416
	30	1	0	6.1	7	3.3	1.3	3.11667	1.17627
	70	2	1.8	6.3	8	6	4.1	4.7	1.0198
	150	3	2	6.4	9	9	5.2	5.76667	1.20379
	300	10	4	6.6	10	11	10	8.6	1.10755
	500	23	5	7	11.9	13.8	11.4	12.0167	2.57299
	1000	45	9	9.5	14	16.1	13	17.7667	5.55738

## Sheet: Current density
Iss/Cm(pA/pF) at different voltages
AtTPC1
	voltage (mV)	Exp 1	Exp 2	Exp 3	Exp 4	Exp 5	Exp 6	Mean	SE
	-80	-3.423	-9.80465	-9.00759	-13.749	-1.03568	-4.46295	-6.91381	1.93395
	-70	-2.2223	-6.02115	-6.26095	-8.45402	-0.60614	-3.2604	-4.47083	1.19625
	-60	-1.42661	-4.33258	-4.7968	-4.83355	-0.385393	-2.55752	-3.05541	0.771476
	-50	-1.02517	-3.40621	-4.09621	-2.56154	-0.305631	-1.43744	-2.1387	0.597468
	-40	-0.721869	-3.06441	-3.72318	-1.43161	-0.256847	-0.908176	-1.68435	0.568385
	-30	-0.52853	-2.82666	-3.20631	-0.720017	-0.157328	-0.52148	-1.32672	0.541719
	-20	-0.403519	-2.80541	-2.91937	-0.331258	-0.115862	-0.289751	-1.14419	0.544912
	-10	-0.310684	-2.77744	-2.59069	-0.151982	-0.114886	-0.126093	-1.01196	0.530099
	0	-0.19646	-2.73464	-2.19307	-0.0158948	-0.0470765	-0.0467983	-0.872323	0.508769
	10	-0.0482633	-0.642754	-1.66334	0.138177	0.104642	0.0542208	-0.342886	0.289236
	20	0.353553	11.2415	0.0905548	0.508888	0.497596	0.250918	2.15717	1.818
	30	1.91434	44.18	6.23058	2.02453	2.39944	0.658073	9.56783	6.96512
	40	7.47542	94.5855	24.2357	7.70354	8.04984	2.18793	24.0397	14.4351
	50	21.7217	156.66	61.2687	24.2531	22.6697	8.1639	49.1229	22.6999
	60	49.074	225.248	115.118	54.9083	52.0791	25.9707	87.0664	30.1747
	70	86.345	296.133	179.711	95.1444	101.447	66.4184	137.533	35.4539
	80	131.711	371.916	251.24	144.183	167.948	129.466	199.411	39.1408
	90	182.237	449.098	326.433	193.873	243.924	209.921	267.581	42.0368
	100	233.497	527.124	402.019	247.417	325.074	297.075	338.701	45.0302
	110	288.396	606.522	481.084	303.14	413.144	387.917	413.367	48.4115
E605A/D606N/E457N
	voltage (mV)	Exp 1	Exp 2	Exp 3	Exp 4	Exp 5	Exp 6	Mean	SE
	-80	-8.46336	-8.5303	-5.01837	-7.05236	-11.5778	-24.4912	-10.8556	2.86425
	-70	-7.85353	-7.32153	-4.41788	-5.80282	-8.59848	-18.0327	-8.67115	1.9702
	-60	-6.85355	-6.94016	-4.12175	-5.00461	-7.55067	-12.4848	-7.15926	1.19059
	-50	-6.17576	-5.89975	-3.86269	-4.55224	-6.03191	-9.00627	-5.92144	0.723572
	-40	-5.54212	-5.87582	-3.51011	-4.27477	-5.61443	-6.91457	-5.28864	0.494971
	-30	-5.15943	-6.2874	-3.51114	-4.22182	-4.93248	-5.46925	-4.93025	0.395838
	-20	-4.64445	-8.34717	-3.8994	-4.30896	-4.46311	-4.42843	-5.01525	0.6741
	-10	-4.42802	-9.81918	-4.72516	-4.92331	-4.4009	-3.9994	-5.38266	0.89656
	0	-0.893855	1.7585	-1.95348	-2.37545	-3.2051	-3.44077	-1.68503	0.783707
	10	14.8521	35.6546	17.6439	11.5225	3.6848	-1.60825	13.6249	5.28596
	20	48.3806	85.3529	59.7488	43.6273	22.8159	7.4625	44.5647	11.1941
	30	99.2887	141.702	115.116	89.6673	56.5295	35.5275	89.6385	15.7872
	40	158.3	203.53	175.147	144.117	103.655	89.1197	145.645	17.6463
	50	223.423	266.887	240.111	205.984	163.352	162.961	210.453	17.0554
	60	292.38	331.652	306.008	269.126	241.132	244.227	280.754	14.6092
	70	361.257	397.461	373.437	336.225	326.753	330.16	354.216	11.4684
	80	434.093	463.985	441.156	405.429	412.453	413.166	428.38	9.08374
	90	506.8	530.776	510.173	476.379	504.604	492.597	503.555	7.42739
	100	582.674	598.397	581.061	548.577	596.946	568.077	579.289	7.6603
	110	657.893	666.748	653.628	620.474	691.661	647.203	656.268	9.54903
VfTPC1
	voltage (mV)	Exp 1	Exp 2	Exp 3	Exp 4	Exp 5	Exp 6	Mean	SE
	-80	-6.5603	-8.36334	-4.96213	-12.6371	-7.43042	-4.56596	-7.41987	1.19769
	-70	-5.26255	-6.25938	-4.53597	-8.36983	-6.09203	-4.20943	-5.7882	0.614168
	-60	-5.18297	-5.42629	-4.22716	-5.49903	-5.38099	-3.63612	-4.89209	0.316067
	-50	-4.26444	-4.98149	-4.20372	-4.16826	-5.07665	-3.51092	-4.36758	0.237398
	-40	-4.29909	-4.88738	-3.77785	-3.37592	-4.89534	-3.22791	-4.07725	0.298757
	-30	-4.04916	-5.22219	-4.57916	-3.15777	-4.61466	-2.9723	-4.0992	0.361288
	-20	-5.17623	-5.6507	-6.15621	-3.34862	-4.83532	-2.99675	-4.69397	0.516287
	-10	-6.1573	-6.8184	-9.22068	-3.23995	-5.23405	-2.8001	-5.57841	0.973735
	0	-5.14447	-3.03679	-4.13525	-2.90425	-1.9675	-1.77297	-3.16021	0.526489
	10	15.7446	20.2199	25.1009	4.054	19.5878	5.76806	15.0792	3.44424
	20	69.9072	68.7865	72.8452	27.2355	69.0204	35.1621	57.1595	8.29407
	30	148.25	133.519	130.238	63.9299	137.653	83.9922	116.264	13.8491
	40	236.823	204.887	190.608	107.137	210.169	144.553	182.363	19.4961
	50	332.838	283.31	253.534	155.64	290.464	211.182	254.495	25.7623
	60	426.071	360.643	315.938	204.462	368.428	282.787	326.388	31.4926
	70	529.734	445.348	381.406	254.7	449	358.273	403.077	38.4839
	80	629.003	526.087	450.121	308.172	534.673	434.348	480.401	44.6526
	90	729.505	609.202	513.134	361.501	615.208	509.014	556.261	51.093
	100	830.931	693.785	588.283	416.385	704.271	587.215	636.812	57.4113
	110	941.492	777.486	654.498	471.264	791.114	666.432	717.048	64.9096

## Sheet: G_Gmax
	G/Gmax at different voltages
AtTPC1
	voltage (mV)	Exp 1	Exp 2	Exp 3	Exp 4	Exp 5	Exp 6	Mean	SE
	-80	5.59005e-05	0.00654851	0.000946839	0.00317018	-0.000941919	-0.000987885	0.00146527	0.00119462
	-70	-0.00032539	0.00482235	0.000875826	0.00432804	-0.00113787	-0.000388998	0.00136233	0.00105151
	-60	5.59271e-05	0.00229515	4.73419e-05	0.00340134	-0.000846689	0.000444997	0.000899678	0.000655759
	-50	-0.000111854	0.00291503	-0.000165697	0.00233017	-0.000511554	7.77996e-05	0.000755648	0.000600243
	-40	5.59271e-05	0.000216144	0.000189368	0.00156858	-1.15985e-05	6.5403e-05	0.000347304	0.000246768
	-30	0.000711767	0.000225703	-7.10132e-05	0.000456126	2.31969e-05	-0.000199201	0.000191096	0.000140447
	-20	0.0018099	-0.000451406	-0.000378736	-0.00055313	-1.15985e-05	-0.000241521	2.89179e-05	0.000364342
	-10	0.00335032	0.000225703	0.00097051	-0.000262118	0.000770383	-0.0005104	0.0007574	0.000568573
	0	0.0105186	-0.00113805	3.2308e-10	0.000359122	0.00113482	0.000533056	0.00190126	0.0017507
	10	0.0283326	3.49822e-05	0.00267482	0.000918445	0.00188017	0.000640351	0.0057469	0.00453328
	20	0.0710983	0.00330606	0.0106046	0.00583264	0.00344963	0.00196594	0.0160429	0.0110814
	30	0.167489	0.0130812	0.032595	0.0142555	0.00870741	0.00341977	0.0399246	0.0258283
	40	0.264994	0.0389923	0.0926483	0.0402423	0.0235907	0.00863961	0.0781846	0.0391151
	50	0.374958	0.0979194	0.185983	0.106166	0.0486489	0.0248925	0.139761	0.052227
	60	0.466255	0.187516	0.303983	0.198611	0.091929	0.0702518	0.219758	0.0600094
	70	0.562035	0.300688	0.428469	0.300406	0.149417	0.158452	0.316578	0.0648664
	80	0.643159	0.424408	0.53274	0.413964	0.214515	0.283492	0.418713	0.064139
	90	0.710708	0.558313	0.63791	0.505398	0.289935	0.416214	0.519746	0.0620898
	100	0.771227	0.665401	0.722439	0.580589	0.354799	0.541583	0.606006	0.0611783
	110	0.830707	0.769492	0.795038	0.661889	0.42878	0.649152	0.689176	0.0599558
E605A/D606N/E457N
	voltage (mV)	Exp 1	Exp 2	Exp 3	Exp 4	Exp 5	Exp 6	Mean	SE
	-80	0.00148712	-0.000570944	-0.000305339	0.00143338	0.00404831	0.0269967	0.00551487	0.004349
	-70	0.000743559	-0.000713485	-0.00131368	0.000728635	0.00216322	0.023374	0.00416371	0.00387437
	-60	0	-0.000206412	0.000248644	0.000286677	0.00210914	0.0182956	0.0034556	0.00298728
	-50	0	0.000412824	-0.000497288	-5.97241e-05	0	0.0133247	0.00219675	0.0022287
	-40	-0.000387944	-0.000206412	0.000248644	0.000119448	0	0.00761764	0.0012319	0.00128052
	-30	0.00154369	0.00189899	0.0057423	-5.97241e-05	-0.00054853	0.00442501	0.00216696	0.00101117
	-20	0.00234382	0.00444837	0.0202746	0.00501084	0.000332208	0	0.00540164	0.00309027
	-10	0.0145559	0.0187702	0.0704124	0.0149549	0.00438824	0	0.0205136	0.0103926
	0	0.0476362	0.0693676	0.195066	0.0466325	0.017383	0.00183617	0.0629868	0.0281707
	10	0.123835	0.182926	0.369801	0.123868	0.0474517	0.015012	0.143815	0.0514044
	20	0.233105	0.353328	0.527017	0.238783	0.0979628	0.0494774	0.249946	0.0709815
	30	0.357223	0.493703	0.646957	0.359706	0.16989	0.131146	0.359771	0.0793188
	40	0.46398	0.600275	0.728423	0.469694	0.244683	0.261589	0.46144	0.0769316
	50	0.559204	0.687236	0.79003	0.572079	0.341464	0.409276	0.559881	0.0682458
	60	0.627571	0.743549	0.841319	0.654426	0.445808	0.552539	0.644202	0.0568238
	70	0.684598	0.797839	0.879843	0.719036	0.537837	0.666969	0.714354	0.0478424
	80	0.742911	0.836603	0.909245	0.777475	0.624637	0.748141	0.773169	0.0392271
	90	0.783823	0.868483	0.927689	0.836333	0.709241	0.817436	0.823834	0.0303913
	100	0.824727	0.902233	0.948446	0.86868	0.774501	0.864011	0.863766	0.0246082
	110	0.862486	0.928079	0.968251	0.906282	0.838826	0.909261	0.902198	0.018879
VfTPC1
	voltage (mV)	Exp 1	Exp 2	Exp 3	Exp 4	Exp 5	Exp 6	Mean	SE
	-80	-0.0017224	0.00366414	0.00285475	-0.000982208	-0.00179082	0.00072528	0.000458124	0.000965758
	-70	-0.000760956	0.00158709	0.00222868	-0.00054906	-0.00119592	0.000119184	0.00023817	0.000561857
	-60	0.000815231	6.04258e-05	0.00102813	0.000115913	0	-0.000124998	0.000315784	0.000196304
	-50	0.000652406	-0.000120852	0.00151059	-0.000231826	0	0.000249996	0.000343386	0.000266514
	-40	-0.000706681	6.04258e-05	0.00378125	0.000115913	0.00271382	-0.000124998	0.000973287	0.000741867
	-30	0.00414262	0.00289753	0.00442553	0.00422166	0.00425627	-0.000273251	0.00327839	0.000745387
	-20	0.00921898	0.00666942	0.00783707	0.00962075	0.0120758	0.00133137	0.00779222	0.00149145
	-10	0.0323224	0.0336449	0.0308136	0.0229141	0.0560152	0.00598828	0.0302831	0.00663933
	0	0.107513	0.104559	0.108714	0.0650148	0.199388	0.0321637	0.102892	0.0229541
	10	0.199972	0.26126	0.270482	0.191414	0.413461	0.0864637	0.237176	0.0443314
	20	0.326026	0.413544	0.447106	0.377845	0.585587	0.230396	0.396751	0.0488229
	30	0.466945	0.540375	0.580409	0.519581	0.698038	0.376522	0.530312	0.0441682
	40	0.533202	0.643325	0.672364	0.623152	0.76205	0.495089	0.621531	0.039411
	50	0.596602	0.723417	0.748428	0.694683	0.80825	0.584582	0.69266	0.0357441
	60	0.66045	0.777427	0.793251	0.749583	0.839617	0.660876	0.746867	0.0297533
	70	0.700983	0.829886	0.82597	0.794099	0.8642	0.730433	0.790929	0.0257387
	80	0.74075	0.865795	0.861423	0.835968	0.881568	0.784031	0.828256	0.0223785
	90	0.791567	0.897763	0.89589	0.867929	0.896876	0.8292	0.863204	0.0179879
	100	0.812505	0.92822	0.915646	0.893949	0.924662	0.865575	0.890093	0.0182003
	110	0.841507	0.951085	0.940038	0.919212	0.948586	0.903903	0.917388	0.0168967

## Sheet: Midpoint voltages V1 and V2
	Midpoint voltages V1 and V2 at 0.2 mM Ca condition					V1									V2	ANOVA
							ANOVA									V2 values
							V1 values										Sum of Squares	df	Mean Square	F
			V1	V2				Sum of Squares	df	Mean Square	F					Between Groups	4500.57	2	2250.29	20.0359
	AtTPC1	Exp 1	62.2857	27.5297			Between Groups	15807.8	2	7903.91	21.6834					Within Groups	1684.69	15	112.313
		Exp 2	85.2203	45.9222			Within Groups	5467.71	15	364.514						Total	6185.26	17
		Exp 3	75.2996	44.6933			Total	21275.5	17
		Exp 4	87.8592	56.5676												Multiple Comparisons
		Exp 5	119.737	60.2491			Multiple Comparisons									V2 values Dunnett t (2-sided)
		Exp 6	94.1326	69.7491			V1 values Dunnett t (2-sided)									V2 values	V2 values	Mean Difference	Std. Error	Sig.	95% Confidence Interval
		Mean	87.4224	50.7852			V1 values	V1 values	Mean Difference	Std. Error	Sig.	95% Confidence Interval									Lower Bound	Upper Bound
		SE	7.90172	6.01168								Lower Bound	Upper Bound			VfTPC1	AtTPC1	-35.4123	6.11862	6.92586e-05	-50.3368	-20.4878
	VfTPC1	Exp 1	-13.9892	13.1149			VfTPC1	AtTPC1	-70.6219	11.0229	2.29151e-05	-97.5089	-43.7349			AtTPC1 triple	AtTPC1	-31.2936	6.11862	0.000244312	-46.2181	-16.3691
		Exp 2	20.8552	10.5896			AtTPC1 triple	AtTPC1	-49.8494	11.0229	0.000774445	-76.7364	-22.9624
		Exp 3	27.3292	16.1581												*. The mean difference is significant at the 0.05 level.
		Exp 4	18.0904	17.6103			*. The mean difference is significant at the 0.05 level.
		Exp 5	10.7072	14.9469
		Exp 6	37.8103	19.8172
		Mean	16.8005	15.3728
		SE	7.2007	1.33584
	E605A/D606N/E457N	Exp 1	38.5324	20.6456
		Exp 2	8.35154	7.78301
		Exp 3	22.4604	17.0402
		Exp 4	40.1462	15.9313
		Exp 5	65.6183	16.5359
		Exp 6	50.3293	39.0134
		Mean	37.573	19.4916
		SE	8.24437	4.26984
