# Supplementary material for: Vicia faba SV channel VfTPC1 is a hyperexcitable variant of plant vacuole Two Pore Channels
Source: eLife. 2023 Nov 22;12:e86384. doi: 10.7554/eLife.86384 (PMC10665017; doi:10.7554/eLife.86384)
Supplement: Figure 13—source data 1. [file elife-86384-fig13-data1.xlsx]

## Sheet: Data_Fig13A
	blue	magenta	black
V [mV]	squares	circles	triangles
-40	0.00016776	8.0063e-06	0.0025839
-30	0.00075847	4.2173e-05	0.0090896
-20	0.0030106	0.00020579	0.0268
-10	0.0102	0.0009032	0.0656
0	0.029	0.0034583	0.1345
10	0.0687	0.0113	0.235
20	0.1377	0.0309	0.3582
30	0.2371	0.0712	0.4885
40	0.3584	0.1397	0.6104
50	0.4869	0.2375	0.7141
60	0.6077	0.3569	0.7961
70	0.7111	0.4838	0.8577
80	0.7933	0.6039	0.9021
90	0.8553	0.7072	0.9334
100	0.9002	0.7899	0.9549

## Sheet: Data_Fig13B
	Voltage [mV]
time [s]	black	blue	magenta
-1.99	-60	-60	-60
-1.94	-60	-60	-60
-1.89	-60	-60	-60
-1.84	-60	-60	-60
-1.79	-60	-60	-60
-1.74	-60	-60	-60
-1.69	-60	-60	-60
-1.64	-60	-60	-60
-1.59	-60	-60	-60
-1.54	-60	-60	-60
0	-60	-60	-60
0.005	11.1559	11.144	11.1399
0.01	78.9004	78.9467	78.9681
0.015	144.228	145.547	146.367
0.02	150.444	172.878	202.969
0.025	59.7513	72.488	116.776
0.03	35.0979	38.4121	50.1071
0.035	30.2048	32.2918	37.8026
0.04	28.092	30.2737	35.5309
0.045	26.5348	28.9212	34.7689
0.05	25.2506	27.8109	34.2694
0.055	24.1643	26.8651	33.8546
0.06	23.2324	26.0486	33.4935
0.065	22.4241	25.3371	33.1754
0.07	21.7168	24.7122	32.8934
0.075	21.093	24.1596	32.6419
0.08	20.5393	23.6681	32.4165
0.085	20.0449	23.2286	32.2133
0.09	19.6012	22.8339	32.0294
0.095	19.2012	22.4778	31.8619
0.1	18.8391	22.1554	31.7087
0.105	-1.3745	-1.1765	0.9618
0.11	-1.746	-2.0678	-2.6919
0.115	-1.7958	-2.1756	-3.2837
0.12	-1.842	-2.2637	-3.5947
0.125	-1.8882	-2.3527	-3.8861
0.13	-1.9345	-2.4431	-4.1873
0.135	-1.9808	-2.5348	-4.5022
0.14	-2.027	-2.6278	-4.8312
0.145	-2.0731	-2.722	-5.1739
0.15	-2.1191	-2.8174	-5.5301
0.155	-2.165	-2.9137	-5.8991
0.16	-2.2108	-3.0111	-6.2803
0.165	-2.2563	-3.1093	-6.673
0.17	-2.3016	-3.2084	-7.0761
0.175	-2.3466	-3.3081	-7.4888
0.18	-2.3913	-3.4086	-7.91
0.185	-2.4358	-3.5096	-8.3385
0.19	-2.4799	-3.6111	-8.773
0.195	-2.5236	-3.7131	-9.2124
0.2	-2.567	-3.8154	-9.6552
0.205	-2.61	-3.9179	-10.1001
0.21	-2.6526	-4.0207	-10.5456
0.215	-2.6947	-4.1237	-10.9904
0.22	-2.7364	-4.2267	-11.4331
0.225	-2.7776	-4.3297	-11.8723
0.23	-2.8184	-4.4327	-12.3067
0.235	-2.8586	-4.5356	-12.735
0.24	-2.8984	-4.6384	-13.1563
0.245	-2.9376	-4.7409	-13.5693
0.25	-2.9764	-4.8432	-13.9731
0.255	-3.0146	-4.9452	-14.367
0.26	-3.0523	-5.0468	-14.7501
0.265	-3.0894	-5.148	-15.122
0.27	-3.126	-5.2488	-15.4822
0.275	-3.162	-5.3491	-15.8303
0.28	-3.1975	-5.4488	-16.1662
0.285	-3.2325	-5.5481	-16.4898
0.29	-3.2669	-5.6468	-16.801
0.295	-3.3007	-5.7448	-17.1002
0.3	-3.334	-5.8423	-17.3873
0.305	-3.3667	-5.9391	-17.6629
0.31	-3.3989	-6.0352	-17.9271
0.315	-3.4305	-6.1306	-18.1804
0.32	-3.4615	-6.2253	-18.4234
0.325	-3.492	-6.3193	-18.6564
0.33	-3.522	-6.4125	-18.88
0.335	-3.5514	-6.505	-19.0948
0.34	-3.5803	-6.5967	-19.3013
0.345	-3.6087	-6.6877	-19.5
0.35	-3.6365	-6.7779	-19.6915
0.355	-3.6638	-6.8672	-19.8763
0.36	-3.6906	-6.9558	-20.0549
0.365	-3.7168	-7.0436	-20.2278
0.37	-3.7426	-7.1306	-20.3956
0.375	-3.7679	-7.2168	-20.5586
0.38	-3.7926	-7.3022	-20.7174
0.385	-3.8169	-7.3868	-20.8723
0.39	-3.8407	-7.4706	-21.0237
0.395	-3.8641	-7.5536	-21.1721
0.4	-3.8869	-7.6358	-21.3177
0.405	-3.9093	-7.7172	-21.4609
0.41	-3.9313	-7.7978	-21.602
0.415	-3.9528	-7.8777	-21.7413
0.42	-3.9739	-7.9568	-21.879
0.425	-3.9945	-8.0351	-22.0155
0.43	-4.0148	-8.1127	-22.1509
0.435	-4.0346	-8.1895	-22.2856
0.44	-4.054	-8.2656	-22.4196
0.445	-4.073	-8.341	-22.5531
0.45	-4.0916	-8.4156	-22.6865
0.455	-4.1098	-8.4895	-22.8198
0.46	-4.1276	-8.5628	-22.9533
0.465	-4.1451	-8.6353	-23.087
0.47	-4.1622	-8.7071	-23.2211
0.475	-4.1789	-8.7783	-23.3557
0.48	-4.1953	-8.8488	-23.4911
0.485	-4.2114	-8.9187	-23.6273
0.49	-4.2271	-8.9879	-23.7644
0.495	-4.2425	-9.0565	-23.9027
0.5	-4.2576	-9.1244	-24.042
0.505	-4.2723	-9.1918	-24.1827
0.51	-4.2867	-9.2586	-24.3248
0.515	-4.3009	-9.3247	-24.4684
0.52	-4.3147	-9.3903	-24.6137
0.525	-4.3283	-9.4554	-24.7607
0.53	-4.3415	-9.5199	-24.9095
0.535	-4.3545	-9.5838	-25.0602
0.54	-4.3673	-9.6472	-25.213
0.545	-4.3797	-9.7101	-25.368
0.55	-4.3919	-9.7725	-25.5252
0.555	-4.4038	-9.8344	-25.6847
0.56	-4.4155	-9.8958	-25.8468
0.565	-4.427	-9.9567	-26.0115
0.57	-4.4382	-10.0172	-26.1788
0.575	-4.4492	-10.0772	-26.349
0.58	-4.4599	-10.1368	-26.5221
0.585	-4.4704	-10.1959	-26.6983
0.59	-4.4808	-10.2546	-26.8777
0.595	-4.4909	-10.313	-27.0604
0.6	-4.5008	-10.3709	-27.2466
0.605	-4.5104	-10.4284	-27.4364
0.61	-4.5199	-10.4855	-27.63
0.615	-4.5292	-10.5423	-27.8275
0.62	-4.5384	-10.5987	-28.029
0.625	-4.5473	-10.6548	-28.2348
0.63	-4.556	-10.7105	-28.445
0.635	-4.5646	-10.7659	-28.6598
0.64	-4.573	-10.8209	-28.8794
0.645	-4.5812	-10.8757	-29.104
0.65	-4.5893	-10.9302	-29.3338
0.655	-4.5972	-10.9843	-29.569
0.66	-4.6049	-11.0382	-29.8099
0.665	-4.6125	-11.0918	-30.0567
0.67	-4.62	-11.1452	-30.3096
0.675	-4.6273	-11.1983	-30.569
0.68	-4.6345	-11.2511	-30.8351
0.685	-4.6415	-11.3037	-31.1083
0.69	-4.6484	-11.3561	-31.3888
0.695	-4.6551	-11.4082	-31.677
0.7	-4.6617	-11.4602	-31.9732
0.705	-4.6682	-11.5119	-32.2779
0.71	-4.6746	-11.5635	-32.5914
0.715	-4.6809	-11.6148	-32.9141
0.72	-4.687	-11.666	-33.2466
0.725	-4.693	-11.717	-33.5892
0.73	-4.6989	-11.7678	-33.9425
0.735	-4.7047	-11.8185	-34.307
0.74	-4.7104	-11.8691	-34.6833
0.745	-4.716	-11.9195	-35.0719
0.75	-4.7215	-11.9697	-35.4734
0.755	-4.7269	-12.0199	-35.8886
0.76	-4.7322	-12.0699	-36.3181
0.765	-4.7374	-12.1198	-36.7625
0.77	-4.7425	-12.1696	-37.2228
0.775	-4.7475	-12.2193	-37.6994
0.78	-4.7524	-12.269	-38.1934
0.785	-4.7572	-12.3185	-38.7054
0.79	-4.762	-12.368	-39.2363
0.795	-4.7666	-12.4174	-39.7868
0.8	-4.7712	-12.4668	-40.3577
0.805	-4.7757	-12.5161	-40.9497
0.81	-4.7802	-12.5654	-41.5633
0.815	-4.7845	-12.6146	-42.1992
0.82	-4.7888	-12.6638	-42.8575
0.825	-4.793	-12.7129	-43.5384
0.83	-4.7972	-12.7621	-44.2417
0.835	-4.8012	-12.8112	-44.9668
0.84	-4.8052	-12.8604	-45.7127
0.845	-4.8092	-12.9095	-46.4775
0.85	-4.8131	-12.9587	-47.2591
0.855	-4.8169	-13.0079	-48.0543
0.86	-4.8206	-13.0571	-48.8589
0.865	-4.8243	-13.1063	-49.6681
0.87	-4.828	-13.1556	-50.4759
0.875	-4.8316	-13.2049	-51.2756
0.88	-4.8351	-13.2543	-52.0598
0.885	-4.8386	-13.3037	-52.8209
0.89	-4.842	-13.3532	-53.5513
0.895	-4.8453	-13.4027	-54.2441
0.9	-4.8487	-13.4524	-54.8932
0.905	-4.8519	-13.5021	-55.4942
0.91	-4.8552	-13.5519	-56.0442
0.915	-4.8583	-13.6019	-56.542
0.92	-4.8615	-13.6519	-56.9882
0.925	-4.8645	-13.702	-57.3846
0.93	-4.8676	-13.7523	-57.7343
0.935	-4.8706	-13.8026	-58.0408
0.94	-4.8735	-13.8532	-58.3082
0.945	-4.8764	-13.9038	-58.5406
0.95	-4.8793	-13.9546	-58.7419
0.955	-4.8822	-14.0056	-58.916
0.96	-4.885	-14.0567	-59.0664
0.965	-4.8877	-14.1079	-59.196
0.97	-4.8904	-14.1594	-59.3077
0.975	-4.8931	-14.211	-59.4039
0.98	-4.8958	-14.2628	-59.4867
0.985	-4.8984	-14.3148	-59.5579
0.99	-4.901	-14.3671	-59.6193
0.995	-4.9035	-14.4195	-59.6721
1	-4.9061	-14.4721	-59.7175
1.005	-4.9085	-14.525	-59.7565
1.01	-4.911	-14.5781	-59.7901
1.015	-4.9134	-14.6314	-59.8191
1.02	-4.9158	-14.685	-59.8439
1.025	-4.9182	-14.7388	-59.8654
1.03	-4.9206	-14.7929	-59.8838
1.035	-4.9229	-14.8473	-59.8996
1.04	-4.9252	-14.9019	-59.9133
1.045	-4.9274	-14.9568	-59.925
1.05	-4.9297	-15.012	-59.9351
1.055	-4.9319	-15.0676	-59.9438
1.06	-4.9341	-15.1234	-59.9513
1.065	-4.9363	-15.1795	-59.9577
1.07	-4.9384	-15.236	-59.9632
1.075	-4.9405	-15.2928	-59.968
1.08	-4.9426	-15.3499	-59.9721
1.085	-4.9447	-15.4074	-59.9756
1.09	-4.9468	-15.4653	-59.9787
1.095	-4.9488	-15.5235	-59.9813
1.1	-4.9508	-15.5821	-59.9835
1.105	-4.9528	-15.6411	-59.9855
1.11	-4.9548	-15.7004	-59.9871
1.115	-4.9568	-15.7602	-59.9886
1.12	-4.9587	-15.8204	-59.9898
1.125	-4.9606	-15.881	-59.9909
1.13	-4.9625	-15.9421	-59.9918
1.135	-4.9644	-16.0036	-59.9926
1.14	-4.9663	-16.0655	-59.9933
1.145	-4.9682	-16.1279	-59.9938
1.15	-4.97	-16.1908	-59.9943
1.155	-4.9718	-16.2542	-59.9948
1.16	-4.9736	-16.3181	-59.9951
1.165	-4.9754	-16.3824	-59.9955
1.17	-4.9772	-16.4473	-59.9957
1.175	-4.979	-16.5127	-59.996
1.18	-4.9807	-16.5787	-59.9962
1.185	-4.9824	-16.6452	-59.9964
1.19	-4.9842	-16.7123	-59.9965
1.195	-4.9859	-16.78	-59.9967
1.2	-4.9876	-16.8482	-59.9968
1.205	-4.9893	-16.9171	-59.9969
1.21	-4.9909	-16.9865	-59.997
1.215	-4.9926	-17.0566	-59.997
1.22	-4.9942	-17.1273	-59.9971
1.225	-4.9959	-17.1987	-59.9971
1.23	-4.9975	-17.2708	-59.9972
1.235	-4.9991	-17.3435	-59.9972
1.24	-5.0007	-17.417	-59.9973
1.245	-5.0023	-17.4911	-59.9973
1.25	-5.0039	-17.566	-59.9973
1.255	-5.0054	-17.6417	-59.9973
1.26	-5.007	-17.718	-59.9974
1.265	-5.0086	-17.7952	-59.9974
1.27	-5.0101	-17.8732	-59.9974
1.275	-5.0116	-17.9519	-59.9974
1.28	-5.0131	-18.0315	-59.9974
1.285	-5.0147	-18.112	-59.9974
1.29	-5.0162	-18.1933	-59.9974
1.295	-5.0177	-18.2755	-59.9974
1.3	-5.0191	-18.3586	-59.9974
1.305	-5.0206	-18.4426	-59.9975
1.31	-5.0221	-18.5276	-59.9975
1.315	-5.0236	-18.6135	-59.9975
1.32	-5.025	-18.7004	-59.9975
1.325	-5.0265	-18.7883	-59.9975
1.33	-5.0279	-18.8772	-59.9975
1.335	-5.0293	-18.9672	-59.9975
1.34	-5.0308	-19.0583	-59.9975
1.345	-5.0322	-19.1504	-59.9975
1.35	-5.0336	-19.2437	-59.9975
1.355	-5.035	-19.3381	-59.9975
1.36	-5.0364	-19.4337	-59.9975
1.365	-5.0378	-19.5305	-59.9975
1.37	-5.0392	-19.6285	-59.9975
1.375	-5.0406	-19.7278	-59.9975
1.38	-5.0419	-19.8283	-59.9975
1.385	-5.0433	-19.9302	-59.9975
1.39	-5.0447	-20.0334	-59.9975
1.395	-5.046	-20.138	-59.9975
1.4	-5.0474	-20.244	-59.9975
1.405	-5.0487	-20.3514	-59.9975
1.41	-5.0501	-20.4603	-59.9975
1.415	-5.0514	-20.5707	-59.9975
1.42	-5.0527	-20.6826	-59.9975
1.425	-5.0541	-20.7961	-59.9975
1.43	-5.0554	-20.9112	-59.9975
1.435	-5.0567	-21.028	-59.9975
1.44	-5.058	-21.1465	-59.9975
1.445	-5.0593	-21.2667	-59.9975
1.45	-5.0606	-21.3887	-59.9975
1.455	-5.0619	-21.5126	-59.9975
1.46	-5.0632	-21.6383	-59.9975
1.465	-5.0645	-21.7659	-59.9975
1.47	-5.0658	-21.8955	-59.9975
1.475	-5.0671	-22.0271	-59.9975
1.48	-5.0683	-22.1607	-59.9975
1.485	-5.0696	-22.2965	-59.9975
1.49	-5.0709	-22.4345	-59.9975
1.495	-5.0721	-22.5747	-59.9975
1.5	-5.0734	-22.7172	-59.9975
1.505	-5.0747	-22.862	-59.9975
1.51	-5.0759	-23.0093	-59.9975
1.515	-5.0772	-23.159	-59.9975
1.52	-5.0784	-23.3113	-59.9975
1.525	-5.0797	-23.4662	-59.9975
1.53	-5.0809	-23.6238	-59.9975
1.535	-5.0822	-23.7842	-59.9975
1.54	-5.0834	-23.9475	-59.9975
1.545	-5.0846	-24.1136	-59.9975
1.55	-5.0858	-24.2828	-59.9975
1.555	-5.0871	-24.4551	-59.9975
1.56	-5.0883	-24.6305	-59.9975
1.565	-5.0895	-24.8093	-59.9975
1.57	-5.0907	-24.9914	-59.9975
1.575	-5.092	-25.177	-59.9975
1.58	-5.0932	-25.3662	-59.9975
1.585	-5.0944	-25.5592	-59.9975
1.59	-5.0956	-25.7559	-59.9975
1.595	-5.0968	-25.9566	-59.9975
1.6	-5.098	-26.1613	-59.9975
1.605	-5.0992	-26.3703	-59.9975
1.61	-5.1004	-26.5835	-59.9975
1.615	-5.1016	-26.8013	-59.9975
1.62	-5.1028	-27.0237	-59.9975
1.625	-5.104	-27.2508	-59.9975
1.63	-5.1052	-27.4829	-59.9975
1.635	-5.1064	-27.7201	-59.9975
1.64	-5.1075	-27.9626	-59.9975
1.645	-5.1087	-28.2106	-59.9975
1.65	-5.1099	-28.4642	-59.9975
1.655	-5.1111	-28.7238	-59.9975
1.66	-5.1123	-28.9894	-59.9975
1.665	-5.1134	-29.2613	-59.9975
1.67	-5.1146	-29.5398	-59.9975
1.675	-5.1158	-29.8251	-59.9975
1.68	-5.117	-30.1175	-59.9975
1.685	-5.1181	-30.4172	-59.9975
1.69	-5.1193	-30.7245	-59.9975
1.695	-5.1205	-31.0398	-59.9975
1.7	-5.1216	-31.3632	-59.9975
1.705	-5.1228	-31.6953	-59.9975
1.71	-5.1239	-32.0363	-59.9975
1.715	-5.1251	-32.3866	-59.9975
1.72	-5.1263	-32.7466	-59.9975
1.725	-5.1274	-33.1166	-59.9975
1.73	-5.1286	-33.4972	-59.9975
1.735	-5.1297	-33.8887	-59.9975
1.74	-5.1309	-34.2917	-59.9975
1.745	-5.132	-34.7065	-59.9975
1.75	-5.1332	-35.1338	-59.9975
1.755	-5.1343	-35.5739	-59.9975
1.76	-5.1355	-36.0276	-59.9975
1.765	-5.1366	-36.4952	-59.9975
1.77	-5.1378	-36.9774	-59.9975
1.775	-5.1389	-37.4748	-59.9975
1.78	-5.14	-37.9878	-59.9975
1.785	-5.1412	-38.5172	-59.9975
1.79	-5.1423	-39.0633	-59.9975
1.795	-5.1435	-39.6268	-59.9975
1.8	-5.1446	-40.208	-59.9975
1.805	-5.1457	-40.8074	-59.9975
1.81	-5.1469	-41.4253	-59.9975
1.815	-5.148	-42.0617	-59.9975
1.82	-5.1491	-42.7167	-59.9975
1.825	-5.1503	-43.39	-59.9975
1.83	-5.1514	-44.0812	-59.9975
1.835	-5.1525	-44.7893	-59.9975
1.84	-5.1536	-45.5131	-59.9975
1.845	-5.1548	-46.2509	-59.9975
1.85	-5.1559	-47.0004	-59.9975
1.855	-5.157	-47.7587	-59.9975
1.86	-5.1581	-48.5223	-59.9975
1.865	-5.1593	-49.287	-59.9975
1.87	-5.1604	-50.0481	-59.9975
1.875	-5.1615	-50.8002	-59.9975
1.88	-5.1626	-51.5376	-59.9975
1.885	-5.1638	-52.2545	-59.9975
1.89	-5.1649	-52.945	-59.9975
1.895	-5.166	-53.6039	-59.9975
1.9	-5.1671	-54.2265	-59.9975
1.905	-5.1682	-54.8092	-59.9975
1.91	-5.1693	-55.3494	-59.9975
1.915	-5.1705	-55.8458	-59.9975
1.92	-5.1716	-56.2984	-59.9975
1.925	-5.1727	-56.708	-59.9975
1.93	-5.1738	-57.0764	-59.9975
1.935	-5.1749	-57.4062	-59.9975
1.94	-5.176	-57.7	-59.9975
1.945	-5.1771	-57.9609	-59.9975
1.95	-5.1783	-58.192	-59.9975
1.955	-5.1794	-58.3964	-59.9975
1.96	-5.1805	-58.5768	-59.9975
1.965	-5.1816	-58.7359	-59.9975
1.97	-5.1827	-58.8762	-59.9975
1.975	-5.1838	-58.9997	-59.9975
1.98	-5.1849	-59.1086	-59.9975
1.985	-5.186	-59.2045	-59.9975
1.99	-5.1871	-59.2889	-59.9975
1.995	-5.1882	-59.3633	-59.9975
2	-5.1893	-59.4288	-59.9975
2.005	-5.1904	-59.4866	-59.9975
2.01	-5.1915	-59.5375	-59.9975
2.015	-5.1926	-59.5824	-59.9975
2.02	-5.1937	-59.622	-59.9975
2.025	-5.1948	-59.657	-59.9975
2.03	-5.1959	-59.6879	-59.9975
2.035	-5.197	-59.7151	-59.9975
2.04	-5.1981	-59.7392	-59.9975
2.045	-5.1992	-59.7606	-59.9975
2.05	-5.2003	-59.7794	-59.9975
2.055	-5.2014	-59.7961	-59.9975
2.06	-5.2025	-59.811	-59.9975
2.065	-5.2036	-59.8241	-59.9975
2.07	-5.2047	-59.8358	-59.9975
2.075	-5.2058	-59.8461	-59.9975
2.08	-5.2069	-59.8553	-59.9975
2.085	-5.208	-59.8635	-59.9975
2.09	-5.2091	-59.8708	-59.9975
2.095	-5.2102	-59.8773	-59.9975
2.1	-5.2113	-59.8831	-59.9975
2.105	-5.2124	-59.8883	-59.9975
2.11	-5.2135	-59.893	-59.9975
2.115	-5.2146	-59.8971	-59.9975
2.12	-5.2157	-59.9008	-59.9975
2.125	-5.2168	-59.9042	-59.9975
2.13	-5.2179	-59.9072	-59.9975
2.135	-5.219	-59.9099	-59.9975
2.14	-5.2201	-59.9123	-59.9975
2.145	-5.2212	-59.9145	-59.9975
2.15	-5.2222	-59.9164	-59.9975
2.155	-5.2233	-59.9182	-59.9975
2.16	-5.2244	-59.9198	-59.9975
2.165	-5.2255	-59.9212	-59.9975
2.17	-5.2266	-59.9226	-59.9975
2.175	-5.2277	-59.9237	-59.9975
2.18	-5.2288	-59.9248	-59.9975
2.185	-5.2299	-59.9258	-59.9975
2.19	-5.231	-59.9267	-59.9975
2.195	-5.2321	-59.9275	-59.9975
2.2	-5.2331	-59.9282	-59.9975
2.205	-5.2342	-59.9289	-59.9975
2.21	-5.2353	-59.9295	-59.9975
2.215	-5.2364	-59.9301	-59.9975
2.22	-5.2375	-59.9306	-59.9975
2.225	-5.2386	-59.9311	-59.9975
2.23	-5.2397	-59.9315	-59.9975
2.235	-5.2408	-59.9319	-59.9975
2.24	-5.2418	-59.9322	-59.9975
2.245	-5.2429	-59.9326	-59.9975
2.25	-5.244	-59.9329	-59.9975
2.255	-5.2451	-59.9332	-59.9975
2.26	-5.2462	-59.9334	-59.9975
2.265	-5.2473	-59.9337	-59.9975
2.27	-5.2483	-59.9339	-59.9975
2.275	-5.2494	-59.9341	-59.9975
2.28	-5.2505	-59.9343	-59.9975
2.285	-5.2516	-59.9344	-59.9975
2.29	-5.2527	-59.9346	-59.9975
2.295	-5.2538	-59.9347	-59.9975
2.3	-5.2548	-59.9349	-59.9975
2.305	-5.2559	-59.935	-59.9975
2.31	-5.257	-59.9351	-59.9975
2.315	-5.2581	-59.9352	-59.9975
2.32	-5.2592	-59.9353	-59.9975
2.325	-5.2603	-59.9354	-59.9975
2.33	-5.2613	-59.9355	-59.9975
2.335	-5.2624	-59.9355	-59.9975
2.34	-5.2635	-59.9356	-59.9975
2.345	-5.2646	-59.9357	-59.9975
2.35	-5.2657	-59.9357	-59.9975
2.355	-5.2667	-59.9358	-59.9975
2.36	-5.2678	-59.9358	-59.9975
2.365	-5.2689	-59.9359	-59.9975
2.37	-5.27	-59.9359	-59.9975
2.375	-5.2711	-59.936	-59.9975
2.38	-5.2721	-59.936	-59.9975
2.385	-5.2732	-59.9361	-59.9975
2.39	-5.2743	-59.9361	-59.9975
2.395	-5.2754	-59.9361	-59.9975
2.4	-5.2764	-59.9361	-59.9975
2.405	-5.2775	-59.9362	-59.9975
2.41	-5.2786	-59.9362	-59.9975
2.415	-5.2797	-59.9362	-59.9975
2.42	-5.2808	-59.9362	-59.9975
2.425	-5.2818	-59.9363	-59.9975
2.43	-5.2829	-59.9363	-59.9975
2.435	-5.284	-59.9363	-59.9975
2.44	-5.2851	-59.9363	-59.9975
2.445	-5.2861	-59.9363	-59.9975
2.45	-5.2872	-59.9363	-59.9975
2.455	-5.2883	-59.9363	-59.9975
2.46	-5.2894	-59.9364	-59.9975
2.465	-5.2904	-59.9364	-59.9975
2.47	-5.2915	-59.9364	-59.9975
2.475	-5.2926	-59.9364	-59.9975
2.48	-5.2937	-59.9364	-59.9975
2.485	-5.2947	-59.9364	-59.9975
2.49	-5.2958	-59.9364	-59.9975
2.495	-5.2969	-59.9364	-59.9975
2.5	-5.298	-59.9364	-59.9975
2.505	-5.299	-59.9364	-59.9975
2.51	-5.3001	-59.9364	-59.9975
2.515	-5.3012	-59.9364	-59.9975
2.52	-5.3023	-59.9365	-59.9975
2.525	-5.3033	-59.9365	-59.9975
2.53	-5.3044	-59.9365	-59.9975
2.535	-5.3055	-59.9365	-59.9975
2.54	-5.3066	-59.9365	-59.9975
2.545	-5.3076	-59.9365	-59.9975
2.55	-5.3087	-59.9365	-59.9975
2.555	-5.3098	-59.9365	-59.9975
2.56	-5.3108	-59.9365	-59.9975
2.565	-5.3119	-59.9365	-59.9975
2.57	-5.313	-59.9365	-59.9975
2.575	-5.3141	-59.9365	-59.9975
2.58	-5.3151	-59.9365	-59.9975
2.585	-5.3162	-59.9365	-59.9975
2.59	-5.3173	-59.9365	-59.9975
2.595	-5.3183	-59.9365	-59.9975
2.6	-5.3194	-59.9365	-59.9975
2.605	-5.3205	-59.9365	-59.9975
2.61	-5.3216	-59.9365	-59.9975
2.615	-5.3226	-59.9365	-59.9975
2.62	-5.3237	-59.9365	-59.9975
2.625	-5.3248	-59.9365	-59.9975
2.63	-5.3258	-59.9365	-59.9975
2.635	-5.3269	-59.9365	-59.9975
2.64	-5.328	-59.9365	-59.9975
2.645	-5.329	-59.9365	-59.9975
2.65	-5.3301	-59.9365	-59.9975
2.655	-5.3312	-59.9365	-59.9975
2.66	-5.3322	-59.9365	-59.9975
2.665	-5.3333	-59.9365	-59.9975
2.67	-5.3344	-59.9365	-59.9975
2.675	-5.3354	-59.9365	-59.9975
2.68	-5.3365	-59.9365	-59.9975
2.685	-5.3376	-59.9365	-59.9975
2.69	-5.3387	-59.9365	-59.9975
2.695	-5.3397	-59.9365	-59.9975
2.7	-5.3408	-59.9365	-59.9975
2.705	-5.3419	-59.9365	-59.9975
2.71	-5.3429	-59.9365	-59.9975
2.715	-5.344	-59.9365	-59.9975
2.72	-5.3451	-59.9365	-59.9975
2.725	-5.3461	-59.9365	-59.9975
2.73	-5.3472	-59.9365	-59.9975
2.735	-5.3483	-59.9365	-59.9975
2.74	-5.3493	-59.9365	-59.9975
2.745	-5.3504	-59.9365	-59.9975
2.75	-5.3515	-59.9365	-59.9975
2.755	-5.3525	-59.9365	-59.9975
2.76	-5.3536	-59.9365	-59.9975
2.765	-5.3547	-59.9365	-59.9975
2.77	-5.3557	-59.9365	-59.9975
2.775	-5.3568	-59.9365	-59.9975
2.78	-5.3578	-59.9365	-59.9975
2.785	-5.3589	-59.9365	-59.9975
2.79	-5.36	-59.9365	-59.9975
2.795	-5.361	-59.9365	-59.9975
2.8	-5.3621	-59.9365	-59.9975
2.805	-5.3632	-59.9365	-59.9975
2.81	-5.3642	-59.9365	-59.9975
2.815	-5.3653	-59.9365	-59.9975
2.82	-5.3664	-59.9365	-59.9975
2.825	-5.3674	-59.9365	-59.9975
2.83	-5.3685	-59.9365	-59.9975
2.835	-5.3695	-59.9365	-59.9975
2.84	-5.3706	-59.9365	-59.9975
2.845	-5.3717	-59.9365	-59.9975
2.85	-5.3727	-59.9365	-59.9975
2.855	-5.3738	-59.9365	-59.9975
2.86	-5.3749	-59.9365	-59.9975
2.865	-5.3759	-59.9365	-59.9975
2.87	-5.377	-59.9365	-59.9975
2.875	-5.3781	-59.9365	-59.9975
2.88	-5.3791	-59.9365	-59.9975
2.885	-5.3802	-59.9365	-59.9975
2.89	-5.3812	-59.9365	-59.9975
2.895	-5.3823	-59.9365	-59.9975
2.9	-5.3834	-59.9365	-59.9975
2.905	-5.3844	-59.9365	-59.9975
2.91	-5.3855	-59.9365	-59.9975
2.915	-5.3865	-59.9365	-59.9975
2.92	-5.3876	-59.9365	-59.9975
2.925	-5.3887	-59.9365	-59.9975
2.93	-5.3897	-59.9365	-59.9975
2.935	-5.3908	-59.9365	-59.9975
2.94	-5.3918	-59.9365	-59.9975
2.945	-5.3929	-59.9365	-59.9975
2.95	-5.394	-59.9365	-59.9975
2.955	-5.395	-59.9365	-59.9975
2.96	-5.3961	-59.9365	-59.9975
2.965	-5.3971	-59.9365	-59.9975
2.97	-5.3982	-59.9365	-59.9975
2.975	-5.3993	-59.9365	-59.9975
2.98	-5.4003	-59.9365	-59.9975
2.985	-5.4014	-59.9365	-59.9975
2.99	-5.4024	-59.9365	-59.9975
2.995	-5.4035	-59.9365	-59.9975
3	-5.4046	-59.9365	-59.9975
3.005	-5.4056	-59.9365	-59.9975
3.01	-5.4067	-59.9365	-59.9975
3.015	-5.4077	-59.9365	-59.9975
3.02	-5.4088	-59.9365	-59.9975
3.025	-5.4098	-59.9365	-59.9975
3.03	-5.4109	-59.9365	-59.9975
3.035	-5.412	-59.9365	-59.9975
3.04	-5.413	-59.9365	-59.9975
3.045	-5.4141	-59.9365	-59.9975
3.05	-5.4151	-59.9365	-59.9975
3.055	-5.4162	-59.9365	-59.9975
3.06	-5.4172	-59.9365	-59.9975
3.065	-5.4183	-59.9365	-59.9975
3.07	-5.4194	-59.9365	-59.9975
3.075	-5.4204	-59.9365	-59.9975
3.08	-5.4215	-59.9365	-59.9975
3.085	-5.4225	-59.9365	-59.9975
3.09	-5.4236	-59.9365	-59.9975
3.095	-5.4246	-59.9365	-59.9975
3.1	-5.4257	-59.9365	-59.9975
3.105	-5.4267	-59.9365	-59.9975
3.11	-5.4278	-59.9365	-59.9975
3.115	-5.4289	-59.9365	-59.9975
3.12	-5.4299	-59.9365	-59.9975
3.125	-5.431	-59.9365	-59.9975
3.13	-5.432	-59.9365	-59.9975
3.135	-5.4331	-59.9365	-59.9975
3.14	-5.4341	-59.9365	-59.9975
3.145	-5.4352	-59.9365	-59.9975
3.15	-5.4362	-59.9365	-59.9975
3.155	-5.4373	-59.9365	-59.9975
3.16	-5.4383	-59.9365	-59.9975
3.165	-5.4394	-59.9365	-59.9975
3.17	-5.4404	-59.9365	-59.9975
3.175	-5.4415	-59.9365	-59.9975
3.18	-5.4425	-59.9365	-59.9975
3.185	-5.4436	-59.9365	-59.9975
3.19	-5.4447	-59.9365	-59.9975
3.195	-5.4457	-59.9365	-59.9975
3.2	-5.4468	-59.9365	-59.9975
3.205	-5.4478	-59.9365	-59.9975
3.21	-5.4489	-59.9365	-59.9975
3.215	-5.4499	-59.9365	-59.9975
3.22	-5.451	-59.9365	-59.9975
3.225	-5.452	-59.9365	-59.9975
3.23	-5.4531	-59.9365	-59.9975
3.235	-5.4541	-59.9365	-59.9975
3.24	-5.4552	-59.9365	-59.9975
3.245	-5.4562	-59.9365	-59.9975
3.25	-5.4573	-59.9365	-59.9975
3.255	-5.4583	-59.9365	-59.9975
3.26	-5.4594	-59.9365	-59.9975
3.265	-5.4604	-59.9365	-59.9975
3.27	-5.4615	-59.9365	-59.9975
3.275	-5.4625	-59.9365	-59.9975
3.28	-5.4636	-59.9365	-59.9975
3.285	-5.4646	-59.9365	-59.9975
3.29	-5.4657	-59.9365	-59.9975
3.295	-5.4667	-59.9365	-59.9975
3.3	-5.4678	-59.9365	-59.9975
3.305	-5.4688	-59.9365	-59.9975
3.31	-5.4699	-59.9365	-59.9975
3.315	-5.4709	-59.9365	-59.9975
3.32	-5.472	-59.9365	-59.9975
3.325	-5.473	-59.9365	-59.9975
3.33	-5.4741	-59.9365	-59.9975
3.335	-5.4751	-59.9365	-59.9975
3.34	-5.4762	-59.9365	-59.9975
3.345	-5.4772	-59.9365	-59.9975
3.35	-5.4783	-59.9365	-59.9975
3.355	-5.4793	-59.9365	-59.9975
3.36	-5.4803	-59.9365	-59.9975
3.365	-5.4814	-59.9365	-59.9975
3.37	-5.4824	-59.9365	-59.9975
3.375	-5.4835	-59.9365	-59.9975
3.38	-5.4845	-59.9365	-59.9975
3.385	-5.4856	-59.9365	-59.9975
3.39	-5.4866	-59.9365	-59.9975
3.395	-5.4877	-59.9365	-59.9975
3.4	-5.4887	-59.9365	-59.9975
3.405	-5.4898	-59.9365	-59.9975
3.41	-5.4908	-59.9365	-59.9975
3.415	-5.4919	-59.9365	-59.9975
3.42	-5.4929	-59.9365	-59.9975
3.425	-5.4939	-59.9365	-59.9975
3.43	-5.495	-59.9365	-59.9975
3.435	-5.496	-59.9365	-59.9975
3.44	-5.4971	-59.9365	-59.9975
3.445	-5.4981	-59.9365	-59.9975
3.45	-5.4992	-59.9365	-59.9975
3.455	-5.5002	-59.9365	-59.9975
3.46	-5.5013	-59.9365	-59.9975
3.465	-5.5023	-59.9365	-59.9975
3.47	-5.5033	-59.9365	-59.9975
3.475	-5.5044	-59.9365	-59.9975
3.48	-5.5054	-59.9365	-59.9975
3.485	-5.5065	-59.9365	-59.9975
3.49	-5.5075	-59.9365	-59.9975
3.495	-5.5086	-59.9365	-59.9975
3.5	-5.5096	-59.9365	-59.9975
3.505	-5.5106	-59.9365	-59.9975
3.51	-5.5117	-59.9365	-59.9975
3.515	-5.5127	-59.9365	-59.9975
3.52	-5.5138	-59.9365	-59.9975
3.525	-5.5148	-59.9365	-59.9975
3.53	-5.5159	-59.9365	-59.9975
3.535	-5.5169	-59.9365	-59.9975
3.54	-5.5179	-59.9365	-59.9975
3.545	-5.519	-59.9365	-59.9975
3.55	-5.52	-59.9365	-59.9975
3.555	-5.5211	-59.9365	-59.9975
3.56	-5.5221	-59.9365	-59.9975
3.565	-5.5231	-59.9365	-59.9975
3.57	-5.5242	-59.9365	-59.9975
3.575	-5.5252	-59.9365	-59.9975
3.58	-5.5263	-59.9365	-59.9975
3.585	-5.5273	-59.9365	-59.9975
3.59	-5.5283	-59.9365	-59.9975
3.595	-5.5294	-59.9365	-59.9975
3.6	-5.5304	-59.9365	-59.9975
3.605	-5.5315	-59.9365	-59.9975
3.61	-5.5325	-59.9365	-59.9975
3.615	-5.5335	-59.9365	-59.9975
3.62	-5.5346	-59.9365	-59.9975
3.625	-5.5356	-59.9365	-59.9975
3.63	-5.5367	-59.9365	-59.9975
3.635	-5.5377	-59.9365	-59.9975
3.64	-5.5387	-59.9365	-59.9975
3.645	-5.5398	-59.9365	-59.9975
3.65	-5.5408	-59.9365	-59.9975
3.655	-5.5418	-59.9365	-59.9975
3.66	-5.5429	-59.9365	-59.9975
3.665	-5.5439	-59.9365	-59.9975
3.67	-5.545	-59.9365	-59.9975
3.675	-5.546	-59.9365	-59.9975
3.68	-5.547	-59.9365	-59.9975
3.685	-5.5481	-59.9365	-59.9975
3.69	-5.5491	-59.9365	-59.9975
3.695	-5.5501	-59.9365	-59.9975
3.7	-5.5512	-59.9365	-59.9975
3.705	-5.5522	-59.9365	-59.9975
3.71	-5.5532	-59.9365	-59.9975
3.715	-5.5543	-59.9365	-59.9975
3.72	-5.5553	-59.9365	-59.9975
3.725	-5.5563	-59.9365	-59.9975
3.73	-5.5574	-59.9365	-59.9975
3.735	-5.5584	-59.9365	-59.9975
3.74	-5.5595	-59.9365	-59.9975
3.745	-5.5605	-59.9365	-59.9975
3.75	-5.5615	-59.9365	-59.9975
3.755	-5.5626	-59.9365	-59.9975
3.76	-5.5636	-59.9365	-59.9975
3.765	-5.5646	-59.9365	-59.9975
3.77	-5.5657	-59.9365	-59.9975
3.775	-5.5667	-59.9365	-59.9975
3.78	-5.5677	-59.9365	-59.9975
3.785	-5.5688	-59.9365	-59.9975
3.79	-5.5698	-59.9365	-59.9975
3.795	-5.5708	-59.9365	-59.9975
3.8	-5.5719	-59.9365	-59.9975
3.805	-5.5729	-59.9365	-59.9975
3.81	-5.5739	-59.9365	-59.9975
3.815	-5.575	-59.9365	-59.9975
3.82	-5.576	-59.9365	-59.9975
3.825	-5.577	-59.9365	-59.9975
3.83	-5.578	-59.9365	-59.9975
3.835	-5.5791	-59.9365	-59.9975
3.84	-5.5801	-59.9365	-59.9975
3.845	-5.5811	-59.9365	-59.9975
3.85	-5.5822	-59.9365	-59.9975
3.855	-5.5832	-59.9365	-59.9975
3.86	-5.5842	-59.9365	-59.9975
3.865	-5.5853	-59.9365	-59.9975
3.87	-5.5863	-59.9365	-59.9975
3.875	-5.5873	-59.9365	-59.9975
3.88	-5.5883	-59.9365	-59.9975
3.885	-5.5894	-59.9365	-59.9975
3.89	-5.5904	-59.9365	-59.9975
3.895	-5.5914	-59.9365	-59.9975
3.9	-5.5925	-59.9365	-59.9975
3.905	-5.5935	-59.9365	-59.9975
3.91	-5.5945	-59.9365	-59.9975
3.915	-5.5956	-59.9365	-59.9975
3.92	-5.5966	-59.9365	-59.9975
3.925	-5.5976	-59.9365	-59.9975
3.93	-5.5986	-59.9365	-59.9975
3.935	-5.5997	-59.9365	-59.9975
3.94	-5.6007	-59.9365	-59.9975
3.945	-5.6017	-59.9365	-59.9975
3.95	-5.6027	-59.9365	-59.9975
3.955	-5.6038	-59.9365	-59.9975
3.96	-5.6048	-59.9365	-59.9975
3.965	-5.6058	-59.9365	-59.9975
3.97	-5.6069	-59.9365	-59.9975
3.975	-5.6079	-59.9365	-59.9975
3.98	-5.6089	-59.9365	-59.9975
3.985	-5.6099	-59.9365	-59.9975
3.99	-5.611	-59.9365	-59.9975
3.995	-5.612	-59.9365	-59.9975
4	-5.613	-59.9365	-59.9975
4.005	-5.614	-59.9365	-59.9975
4.01	-5.6151	-59.9365	-59.9975
4.015	-5.6161	-59.9365	-59.9975
4.02	-5.6171	-59.9365	-59.9975
4.025	-5.6181	-59.9365	-59.9975
4.03	-5.6192	-59.9365	-59.9975
4.035	-5.6202	-59.9365	-59.9975
4.04	-5.6212	-59.9365	-59.9975
4.045	-5.6222	-59.9365	-59.9975
4.05	-5.6232	-59.9365	-59.9975
4.055	-5.6243	-59.9365	-59.9975
4.06	-5.6253	-59.9365	-59.9975
4.065	-5.6263	-59.9365	-59.9975
4.07	-5.6273	-59.9365	-59.9975
4.075	-5.6284	-59.9365	-59.9975
4.08	-5.6294	-59.9365	-59.9975
4.085	-5.6304	-59.9365	-59.9975
4.09	-5.6314	-59.9365	-59.9975
4.095	-5.6324	-59.9365	-59.9975
4.1	-5.6335	-59.9365	-59.9975
4.105	-5.6345	-59.9365	-59.9975
4.11	-5.6355	-59.9365	-59.9975
4.115	-5.6365	-59.9365	-59.9975
4.12	-5.6376	-59.9365	-59.9975
4.125	-5.6386	-59.9365	-59.9975
4.13	-5.6396	-59.9365	-59.9975
4.135	-5.6406	-59.9365	-59.9975
4.14	-5.6416	-59.9365	-59.9975
4.145	-5.6427	-59.9365	-59.9975
4.15	-5.6437	-59.9365	-59.9975
4.155	-5.6447	-59.9365	-59.9975
4.16	-5.6457	-59.9365	-59.9975
4.165	-5.6467	-59.9365	-59.9975
4.17	-5.6478	-59.9365	-59.9975
4.175	-5.6488	-59.9365	-59.9975
4.18	-5.6498	-59.9365	-59.9975
4.185	-5.6508	-59.9365	-59.9975
4.19	-5.6518	-59.9365	-59.9975
4.195	-5.6528	-59.9365	-59.9975
4.2	-5.6539	-59.9365	-59.9975
4.205	-5.6549	-59.9365	-59.9975
4.21	-5.6559	-59.9365	-59.9975
4.215	-5.6569	-59.9365	-59.9975
4.22	-5.6579	-59.9365	-59.9975
4.225	-5.6589	-59.9365	-59.9975
4.23	-5.66	-59.9365	-59.9975
4.235	-5.661	-59.9365	-59.9975
4.24	-5.662	-59.9365	-59.9975
4.245	-5.663	-59.9365	-59.9975
4.25	-5.664	-59.9365	-59.9975
4.255	-5.665	-59.9365	-59.9975
4.26	-5.6661	-59.9365	-59.9975
4.265	-5.6671	-59.9365	-59.9975
4.27	-5.6681	-59.9365	-59.9975
4.275	-5.6691	-59.9365	-59.9975
4.28	-5.6701	-59.9365	-59.9975
4.285	-5.6711	-59.9365	-59.9975
4.29	-5.6721	-59.9365	-59.9975
4.295	-5.6732	-59.9365	-59.9975
4.3	-5.6742	-59.9365	-59.9975
4.305	-5.6752	-59.9365	-59.9975
4.31	-5.6762	-59.9365	-59.9975
4.315	-5.6772	-59.9365	-59.9975
4.32	-5.6782	-59.9365	-59.9975
4.325	-5.6792	-59.9365	-59.9975
4.33	-5.6803	-59.9365	-59.9975
4.335	-5.6813	-59.9365	-59.9975
4.34	-5.6823	-59.9365	-59.9975
4.345	-5.6833	-59.9365	-59.9975
4.35	-5.6843	-59.9365	-59.9975
4.355	-5.6853	-59.9365	-59.9975
4.36	-5.6863	-59.9365	-59.9975
4.365	-5.6873	-59.9365	-59.9975
4.37	-5.6883	-59.9365	-59.9975
4.375	-5.6894	-59.9365	-59.9975
4.38	-5.6904	-59.9365	-59.9975
4.385	-5.6914	-59.9365	-59.9975
4.39	-5.6924	-59.9365	-59.9975
4.395	-5.6934	-59.9365	-59.9975
4.4	-5.6944	-59.9365	-59.9975
4.405	-5.6954	-59.9365	-59.9975
4.41	-5.6964	-59.9365	-59.9975
4.415	-5.6974	-59.9365	-59.9975
4.42	-5.6984	-59.9365	-59.9975
4.425	-5.6995	-59.9365	-59.9975
4.43	-5.7005	-59.9365	-59.9975
4.435	-5.7015	-59.9365	-59.9975
4.44	-5.7025	-59.9365	-59.9975
4.445	-5.7035	-59.9365	-59.9975
4.45	-5.7045	-59.9365	-59.9975
4.455	-5.7055	-59.9365	-59.9975
4.46	-5.7065	-59.9365	-59.9975
4.465	-5.7075	-59.9365	-59.9975
4.47	-5.7085	-59.9365	-59.9975
4.475	-5.7095	-59.9365	-59.9975
4.48	-5.7105	-59.9365	-59.9975
4.485	-5.7115	-59.9365	-59.9975
4.49	-5.7126	-59.9365	-59.9975
4.495	-5.7136	-59.9365	-59.9975
4.5	-5.7146	-59.9365	-59.9975
4.505	-5.7156	-59.9365	-59.9975
4.51	-5.7166	-59.9365	-59.9975
4.515	-5.7176	-59.9365	-59.9975
4.52	-5.7186	-59.9365	-59.9975
4.525	-5.7196	-59.9365	-59.9975
4.53	-5.7206	-59.9365	-59.9975
4.535	-5.7216	-59.9365	-59.9975
4.54	-5.7226	-59.9365	-59.9975
4.545	-5.7236	-59.9365	-59.9975
4.55	-5.7246	-59.9365	-59.9975
4.555	-5.7256	-59.9365	-59.9975
4.56	-5.7266	-59.9365	-59.9975
4.565	-5.7276	-59.9365	-59.9975
4.57	-5.7286	-59.9365	-59.9975
4.575	-5.7296	-59.9365	-59.9975
4.58	-5.7306	-59.9365	-59.9975
4.585	-5.7316	-59.9365	-59.9975
4.59	-5.7326	-59.9365	-59.9975
4.595	-5.7336	-59.9365	-59.9975
4.6	-5.7346	-59.9365	-59.9975
4.605	-5.7356	-59.9365	-59.9975
4.61	-5.7366	-59.9365	-59.9975
4.615	-5.7376	-59.9365	-59.9975
4.62	-5.7386	-59.9365	-59.9975
4.625	-5.7396	-59.9365	-59.9975
4.63	-5.7406	-59.9365	-59.9975
4.635	-5.7416	-59.9365	-59.9975
4.64	-5.7426	-59.9365	-59.9975
4.645	-5.7436	-59.9365	-59.9975
4.65	-5.7446	-59.9365	-59.9975
4.655	-5.7456	-59.9365	-59.9975
4.66	-5.7466	-59.9365	-59.9975
4.665	-5.7476	-59.9365	-59.9975
4.67	-5.7486	-59.9365	-59.9975
4.675	-5.7496	-59.9365	-59.9975
4.68	-5.7506	-59.9365	-59.9975
4.685	-5.7516	-59.9365	-59.9975
4.69	-5.7526	-59.9365	-59.9975
4.695	-5.7536	-59.9365	-59.9975
4.7	-5.7546	-59.9365	-59.9975
4.705	-5.7556	-59.9365	-59.9975
4.71	-5.7566	-59.9365	-59.9975
4.715	-5.7576	-59.9365	-59.9975
4.72	-5.7586	-59.9365	-59.9975
4.725	-5.7596	-59.9365	-59.9975
4.73	-5.7606	-59.9365	-59.9975
4.735	-5.7616	-59.9365	-59.9975
4.74	-5.7626	-59.9365	-59.9975
4.745	-5.7636	-59.9365	-59.9975
4.75	-5.7646	-59.9365	-59.9975
4.755	-5.7656	-59.9365	-59.9975
4.76	-5.7666	-59.9365	-59.9975
4.765	-5.7676	-59.9365	-59.9975
4.77	-5.7686	-59.9365	-59.9975
4.775	-5.7696	-59.9365	-59.9975
4.78	-5.7706	-59.9365	-59.9975
4.785	-5.7715	-59.9365	-59.9975
4.79	-5.7725	-59.9365	-59.9975
4.795	-5.7735	-59.9365	-59.9975
4.8	-5.7745	-59.9365	-59.9975
4.805	-5.7755	-59.9365	-59.9975
4.81	-5.7765	-59.9365	-59.9975
4.815	-5.7775	-59.9365	-59.9975
4.82	-5.7785	-59.9365	-59.9975
4.825	-5.7795	-59.9365	-59.9975
4.83	-5.7805	-59.9365	-59.9975
4.835	-5.7815	-59.9365	-59.9975
4.84	-5.7825	-59.9365	-59.9975
4.845	-5.7835	-59.9365	-59.9975
4.85	-5.7844	-59.9365	-59.9975
4.855	-5.7854	-59.9365	-59.9975
4.86	-5.7864	-59.9365	-59.9975
4.865	-5.7874	-59.9365	-59.9975
4.87	-5.7884	-59.9365	-59.9975
4.875	-5.7894	-59.9365	-59.9975
4.88	-5.7904	-59.9365	-59.9975
4.885	-5.7914	-59.9365	-59.9975
4.89	-5.7924	-59.9365	-59.9975
4.895	-5.7934	-59.9365	-59.9975
4.9	-5.7943	-59.9365	-59.9975
4.905	-5.7953	-59.9365	-59.9975
4.91	-5.7963	-59.9365	-59.9975
4.915	-5.7973	-59.9365	-59.9975
4.92	-5.7983	-59.9365	-59.9975
4.925	-5.7993	-59.9365	-59.9975
4.93	-5.8003	-59.9365	-59.9975
4.935	-5.8013	-59.9365	-59.9975
4.94	-5.8022	-59.9365	-59.9975
4.945	-5.8032	-59.9365	-59.9975
4.95	-5.8042	-59.9365	-59.9975
4.955	-5.8052	-59.9365	-59.9975
4.96	-5.8062	-59.9365	-59.9975
4.965	-5.8072	-59.9365	-59.9975
4.97	-5.8082	-59.9365	-59.9975
4.975	-5.8091	-59.9365	-59.9975
4.98	-5.8101	-59.9365	-59.9975
4.985	-5.8111	-59.9365	-59.9975
4.99	-5.8121	-59.9365	-59.9975
4.995	-5.8131	-59.9365	-59.9975
5	-5.8141	-59.9365	-59.9975
5.005	-5.8151	-59.9365	-59.9975
5.01	-5.816	-59.9365	-59.9975
5.015	-5.817	-59.9365	-59.9975
5.02	-5.818	-59.9365	-59.9975
5.025	-5.819	-59.9365	-59.9975
5.03	-5.82	-59.9365	-59.9975
5.035	-5.821	-59.9365	-59.9975
5.04	-5.8219	-59.9365	-59.9975
5.045	-5.8229	-59.9365	-59.9975
5.05	-5.8239	-59.9365	-59.9975
5.055	-5.8249	-59.9365	-59.9975
5.06	-5.8259	-59.9365	-59.9975
5.065	-5.8268	-59.9365	-59.9975
5.07	-5.8278	-59.9365	-59.9975
5.075	-5.8288	-59.9365	-59.9975
5.08	-5.8298	-59.9365	-59.9975
5.085	-5.8308	-59.9365	-59.9975
5.09	-5.8317	-59.9365	-59.9975
5.095	-5.8327	-59.9365	-59.9975
5.1	-5.8337	-59.9365	-59.9975
5.105	-5.8347	-59.9365	-59.9975
5.11	-5.8357	-59.9365	-59.9975
5.115	-5.8366	-59.9365	-59.9975
5.12	-5.8376	-59.9365	-59.9975
5.125	-5.8386	-59.9365	-59.9975
5.13	-5.8396	-59.9365	-59.9975
5.135	-5.8406	-59.9365	-59.9975
5.14	-5.8415	-59.9365	-59.9975
5.145	-5.8425	-59.9365	-59.9975
5.15	-5.8435	-59.9365	-59.9975
5.155	-5.8445	-59.9365	-59.9975
5.16	-5.8454	-59.9365	-59.9975
5.165	-5.8464	-59.9365	-59.9975
5.17	-5.8474	-59.9365	-59.9975
5.175	-5.8484	-59.9365	-59.9975
5.18	-5.8494	-59.9365	-59.9975
5.185	-5.8503	-59.9365	-59.9975
5.19	-5.8513	-59.9365	-59.9975
5.195	-5.8523	-59.9365	-59.9975
5.2	-5.8533	-59.9365	-59.9975
5.205	-5.8542	-59.9365	-59.9975
5.21	-5.8552	-59.9365	-59.9975
5.215	-5.8562	-59.9365	-59.9975
5.22	-5.8572	-59.9365	-59.9975
5.225	-5.8581	-59.9365	-59.9975
5.23	-5.8591	-59.9365	-59.9975
5.235	-5.8601	-59.9365	-59.9975
5.24	-5.861	-59.9365	-59.9975
5.245	-5.862	-59.9365	-59.9975
5.25	-5.863	-59.9365	-59.9975
5.255	-5.864	-59.9365	-59.9975
5.26	-5.8649	-59.9365	-59.9975
5.265	-5.8659	-59.9365	-59.9975
5.27	-5.8669	-59.9365	-59.9975
5.275	-5.8679	-59.9365	-59.9975
5.28	-5.8688	-59.9365	-59.9975
5.285	-5.8698	-59.9365	-59.9975
5.29	-5.8708	-59.9365	-59.9975
5.295	-5.8717	-59.9365	-59.9975
5.3	-5.8727	-59.9365	-59.9975
5.305	-5.8737	-59.9365	-59.9975
5.31	-5.8746	-59.9365	-59.9975
5.315	-5.8756	-59.9365	-59.9975
5.32	-5.8766	-59.9365	-59.9975
5.325	-5.8776	-59.9365	-59.9975
5.33	-5.8785	-59.9365	-59.9975
5.335	-5.8795	-59.9365	-59.9975
5.34	-5.8805	-59.9365	-59.9975
5.345	-5.8814	-59.9365	-59.9975
5.35	-5.8824	-59.9365	-59.9975
5.355	-5.8834	-59.9365	-59.9975
5.36	-5.8843	-59.9365	-59.9975
5.365	-5.8853	-59.9365	-59.9975
5.37	-5.8863	-59.9365	-59.9975
5.375	-5.8872	-59.9365	-59.9975
5.38	-5.8882	-59.9365	-59.9975
5.385	-5.8892	-59.9365	-59.9975
5.39	-5.8901	-59.9365	-59.9975
5.395	-5.8911	-59.9365	-59.9975
5.4	-5.8921	-59.9365	-59.9975
5.405	-5.893	-59.9365	-59.9975
5.41	-5.894	-59.9365	-59.9975
5.415	-5.895	-59.9365	-59.9975
5.42	-5.8959	-59.9365	-59.9975
5.425	-5.8969	-59.9365	-59.9975
5.43	-5.8979	-59.9365	-59.9975
5.435	-5.8988	-59.9365	-59.9975
5.44	-5.8998	-59.9365	-59.9975
5.445	-5.9007	-59.9365	-59.9975
5.45	-5.9017	-59.9365	-59.9975
5.455	-5.9027	-59.9365	-59.9975
5.46	-5.9036	-59.9365	-59.9975
5.465	-5.9046	-59.9365	-59.9975
5.47	-5.9056	-59.9365	-59.9975
5.475	-5.9065	-59.9365	-59.9975
5.48	-5.9075	-59.9365	-59.9975
5.485	-5.9084	-59.9365	-59.9975
5.49	-5.9094	-59.9365	-59.9975
5.495	-5.9104	-59.9365	-59.9975
5.5	-5.9113	-59.9365	-59.9975
5.505	-5.9123	-59.9365	-59.9975
5.51	-5.9132	-59.9365	-59.9975
5.515	-5.9142	-59.9365	-59.9975
5.52	-5.9152	-59.9365	-59.9975
5.525	-5.9161	-59.9365	-59.9975
5.53	-5.9171	-59.9365	-59.9975
5.535	-5.918	-59.9365	-59.9975
5.54	-5.919	-59.9365	-59.9975
5.545	-5.92	-59.9365	-59.9975
5.55	-5.9209	-59.9365	-59.9975
5.555	-5.9219	-59.9365	-59.9975
5.56	-5.9228	-59.9365	-59.9975
5.565	-5.9238	-59.9365	-59.9975
5.57	-5.9248	-59.9365	-59.9975
5.575	-5.9257	-59.9365	-59.9975
5.58	-5.9267	-59.9365	-59.9975
5.585	-5.9276	-59.9365	-59.9975
5.59	-5.9286	-59.9365	-59.9975
5.595	-5.9295	-59.9365	-59.9975
5.6	-5.9305	-59.9365	-59.9975
5.605	-5.9314	-59.9365	-59.9975
5.61	-5.9324	-59.9365	-59.9975
5.615	-5.9334	-59.9365	-59.9975
5.62	-5.9343	-59.9365	-59.9975
5.625	-5.9353	-59.9365	-59.9975
5.63	-5.9362	-59.9365	-59.9975
5.635	-5.9372	-59.9365	-59.9975
5.64	-5.9381	-59.9365	-59.9975
5.645	-5.9391	-59.9365	-59.9975
5.65	-5.94	-59.9365	-59.9975
5.655	-5.941	-59.9365	-59.9975
5.66	-5.9419	-59.9365	-59.9975
5.665	-5.9429	-59.9365	-59.9975
5.67	-5.9438	-59.9365	-59.9975
5.675	-5.9448	-59.9365	-59.9975
5.68	-5.9458	-59.9365	-59.9975
5.685	-5.9467	-59.9365	-59.9975
5.69	-5.9477	-59.9365	-59.9975
5.695	-5.9486	-59.9365	-59.9975
5.7	-5.9496	-59.9365	-59.9975
5.705	-5.9505	-59.9365	-59.9975
5.71	-5.9515	-59.9365	-59.9975
5.715	-5.9524	-59.9365	-59.9975
5.72	-5.9534	-59.9365	-59.9975
5.725	-5.9543	-59.9365	-59.9975
5.73	-5.9553	-59.9365	-59.9975
5.735	-5.9562	-59.9365	-59.9975
5.74	-5.9572	-59.9365	-59.9975
5.745	-5.9581	-59.9365	-59.9975
5.75	-5.9591	-59.9365	-59.9975
5.755	-5.96	-59.9365	-59.9975
5.76	-5.9609	-59.9365	-59.9975
5.765	-5.9619	-59.9365	-59.9975
5.77	-5.9628	-59.9365	-59.9975
5.775	-5.9638	-59.9365	-59.9975
5.78	-5.9647	-59.9365	-59.9975
5.785	-5.9657	-59.9365	-59.9975
5.79	-5.9666	-59.9365	-59.9975
5.795	-5.9676	-59.9365	-59.9975
5.8	-5.9685	-59.9365	-59.9975
5.805	-5.9695	-59.9365	-59.9975
5.81	-5.9704	-59.9365	-59.9975
5.815	-5.9714	-59.9365	-59.9975
5.82	-5.9723	-59.9365	-59.9975
5.825	-5.9732	-59.9365	-59.9975
5.83	-5.9742	-59.9365	-59.9975
5.835	-5.9751	-59.9365	-59.9975
5.84	-5.9761	-59.9365	-59.9975
5.845	-5.977	-59.9365	-59.9975
5.85	-5.978	-59.9365	-59.9975
5.855	-5.9789	-59.9365	-59.9975
5.86	-5.9798	-59.9365	-59.9975
5.865	-5.9808	-59.9365	-59.9975
5.87	-5.9817	-59.9365	-59.9975
5.875	-5.9827	-59.9365	-59.9975
5.88	-5.9836	-59.9365	-59.9975
5.885	-5.9846	-59.9365	-59.9975
5.89	-5.9855	-59.9365	-59.9975
5.895	-5.9864	-59.9365	-59.9975
5.9	-5.9874	-59.9365	-59.9975
5.905	-5.9883	-59.9365	-59.9975
5.91	-5.9893	-59.9365	-59.9975
5.915	-5.9902	-59.9365	-59.9975
5.92	-5.9911	-59.9365	-59.9975
5.925	-5.9921	-59.9365	-59.9975
5.93	-5.993	-59.9365	-59.9975
5.935	-5.994	-59.9365	-59.9975
5.94	-5.9949	-59.9365	-59.9975
5.945	-5.9958	-59.9365	-59.9975
5.95	-5.9968	-59.9365	-59.9975
5.955	-5.9977	-59.9365	-59.9975
5.96	-5.9986	-59.9365	-59.9975
5.965	-5.9996	-59.9365	-59.9975
5.97	-6.0005	-59.9365	-59.9975
5.975	-6.0015	-59.9365	-59.9975
5.98	-6.0024	-59.9365	-59.9975
5.985	-6.0033	-59.9365	-59.9975
5.99	-6.0043	-59.9365	-59.9975
5.995	-6.0052	-59.9365	-59.9975
6	-6.0061	-59.9365	-59.9975
6.005	-6.0071	-59.9365	-59.9975
6.01	-6.008	-59.9365	-59.9975
6.015	-6.0089	-59.9365	-59.9975
6.02	-6.0099	-59.9365	-59.9975
6.025	-6.0108	-59.9365	-59.9975
6.03	-6.0117	-59.9365	-59.9975
6.035	-6.0127	-59.9365	-59.9975
6.04	-6.0136	-59.9365	-59.9975
6.045	-6.0145	-59.9365	-59.9975
6.05	-6.0155	-59.9365	-59.9975
6.055	-6.0164	-59.9365	-59.9975
6.06	-6.0173	-59.9365	-59.9975
6.065	-6.0183	-59.9365	-59.9975
6.07	-6.0192	-59.9365	-59.9975
6.075	-6.0201	-59.9365	-59.9975
6.08	-6.0211	-59.9365	-59.9975
6.085	-6.022	-59.9365	-59.9975
6.09	-6.0229	-59.9365	-59.9975
6.095	-6.0239	-59.9365	-59.9975
6.1	-6.0248	-59.9365	-59.9975
6.105	-6.0257	-59.9365	-59.9975
6.11	-6.0267	-59.9365	-59.9975
6.115	-6.0276	-59.9365	-59.9975
6.12	-6.0285	-59.9365	-59.9975
6.125	-6.0294	-59.9365	-59.9975
6.13	-6.0304	-59.9365	-59.9975
6.135	-6.0313	-59.9365	-59.9975
6.14	-6.0322	-59.9365	-59.9975
6.145	-6.0332	-59.9365	-59.9975
6.15	-6.0341	-59.9365	-59.9975
6.155	-6.035	-59.9365	-59.9975
6.16	-6.0359	-59.9365	-59.9975
6.165	-6.0369	-59.9365	-59.9975
6.17	-6.0378	-59.9365	-59.9975
6.175	-6.0387	-59.9365	-59.9975
6.18	-6.0396	-59.9365	-59.9975
6.185	-6.0406	-59.9365	-59.9975
6.19	-6.0415	-59.9365	-59.9975
6.195	-6.0424	-59.9365	-59.9975
6.2	-6.0433	-59.9365	-59.9975
6.205	-6.0443	-59.9365	-59.9975
6.21	-6.0452	-59.9365	-59.9975
6.215	-6.0461	-59.9365	-59.9975
6.22	-6.047	-59.9365	-59.9975
6.225	-6.048	-59.9365	-59.9975
6.23	-6.0489	-59.9365	-59.9975
6.235	-6.0498	-59.9365	-59.9975
6.24	-6.0507	-59.9365	-59.9975
6.245	-6.0516	-59.9365	-59.9975
6.25	-6.0526	-59.9365	-59.9975
6.255	-6.0535	-59.9365	-59.9975
6.26	-6.0544	-59.9365	-59.9975
6.265	-6.0553	-59.9365	-59.9975
6.27	-6.0563	-59.9365	-59.9975
6.275	-6.0572	-59.9365	-59.9975
6.28	-6.0581	-59.9365	-59.9975
6.285	-6.059	-59.9365	-59.9975
6.29	-6.0599	-59.9365	-59.9975
6.295	-6.0609	-59.9365	-59.9975
6.3	-6.0618	-59.9365	-59.9975
6.305	-6.0627	-59.9365	-59.9975
6.31	-6.0636	-59.9365	-59.9975
6.315	-6.0645	-59.9365	-59.9975
6.32	-6.0655	-59.9365	-59.9975
6.325	-6.0664	-59.9365	-59.9975
6.33	-6.0673	-59.9365	-59.9975
6.335	-6.0682	-59.9365	-59.9975
6.34	-6.0691	-59.9365	-59.9975
6.345	-6.07	-59.9365	-59.9975
6.35	-6.071	-59.9365	-59.9975
6.355	-6.0719	-59.9365	-59.9975
6.36	-6.0728	-59.9365	-59.9975
6.365	-6.0737	-59.9365	-59.9975
6.37	-6.0746	-59.9365	-59.9975
6.375	-6.0755	-59.9365	-59.9975
6.38	-6.0764	-59.9365	-59.9975
6.385	-6.0774	-59.9365	-59.9975
6.39	-6.0783	-59.9365	-59.9975
6.395	-6.0792	-59.9365	-59.9975
6.4	-6.0801	-59.9365	-59.9975
6.405	-6.081	-59.9365	-59.9975
6.41	-6.0819	-59.9365	-59.9975
6.415	-6.0828	-59.9365	-59.9975
6.42	-6.0838	-59.9365	-59.9975
6.425	-6.0847	-59.9365	-59.9975
6.43	-6.0856	-59.9365	-59.9975
6.435	-6.0865	-59.9365	-59.9975
6.44	-6.0874	-59.9365	-59.9975
6.445	-6.0883	-59.9365	-59.9975
6.45	-6.0892	-59.9365	-59.9975
6.455	-6.0901	-59.9365	-59.9975
6.46	-6.091	-59.9365	-59.9975
6.465	-6.092	-59.9365	-59.9975
6.47	-6.0929	-59.9365	-59.9975
6.475	-6.0938	-59.9365	-59.9975
6.48	-6.0947	-59.9365	-59.9975
6.485	-6.0956	-59.9365	-59.9975
6.49	-6.0965	-59.9365	-59.9975
6.495	-6.0974	-59.9365	-59.9975
6.5	-6.0983	-59.9365	-59.9975
6.505	-6.0992	-59.9365	-59.9975
6.51	-6.1001	-59.9365	-59.9975
6.515	-6.101	-59.9365	-59.9975
6.52	-6.102	-59.9365	-59.9975
6.525	-6.1029	-59.9365	-59.9975
6.53	-6.1038	-59.9365	-59.9975
6.535	-6.1047	-59.9365	-59.9975
6.54	-6.1056	-59.9365	-59.9975
6.545	-6.1065	-59.9365	-59.9975
6.55	-6.1074	-59.9365	-59.9975
6.555	-6.1083	-59.9365	-59.9975
6.56	-6.1092	-59.9365	-59.9975
6.565	-6.1101	-59.9365	-59.9975
6.57	-6.111	-59.9365	-59.9975
6.575	-6.1119	-59.9365	-59.9975
6.58	-6.1128	-59.9365	-59.9975
6.585	-6.1137	-59.9365	-59.9975
6.59	-6.1146	-59.9365	-59.9975
6.595	-6.1155	-59.9365	-59.9975
6.6	-6.1164	-59.9365	-59.9975
6.605	-6.1173	-59.9365	-59.9975
6.61	-6.1182	-59.9365	-59.9975
6.615	-6.1191	-59.9365	-59.9975
6.62	-6.12	-59.9365	-59.9975
6.625	-6.1209	-59.9365	-59.9975
6.63	-6.1218	-59.9365	-59.9975
6.635	-6.1227	-59.9365	-59.9975
6.64	-6.1236	-59.9365	-59.9975
6.645	-6.1245	-59.9365	-59.9975
6.65	-6.1254	-59.9365	-59.9975
6.655	-6.1263	-59.9365	-59.9975
6.66	-6.1272	-59.9365	-59.9975
6.665	-6.1281	-59.9365	-59.9975
6.67	-6.129	-59.9365	-59.9975
6.675	-6.1299	-59.9365	-59.9975
6.68	-6.1308	-59.9365	-59.9975
6.685	-6.1317	-59.9365	-59.9975
6.69	-6.1326	-59.9365	-59.9975
6.695	-6.1335	-59.9365	-59.9975
6.7	-6.1344	-59.9365	-59.9975
6.705	-6.1353	-59.9365	-59.9975
6.71	-6.1362	-59.9365	-59.9975
6.715	-6.1371	-59.9365	-59.9975
6.72	-6.138	-59.9365	-59.9975
6.725	-6.1389	-59.9365	-59.9975
6.73	-6.1398	-59.9365	-59.9975
6.735	-6.1407	-59.9365	-59.9975
6.74	-6.1416	-59.9365	-59.9975
6.745	-6.1425	-59.9365	-59.9975
6.75	-6.1434	-59.9365	-59.9975
6.755	-6.1443	-59.9365	-59.9975
6.76	-6.1452	-59.9365	-59.9975
6.765	-6.1461	-59.9365	-59.9975
6.77	-6.1469	-59.9365	-59.9975
6.775	-6.1478	-59.9365	-59.9975
6.78	-6.1487	-59.9365	-59.9975
6.785	-6.1496	-59.9365	-59.9975
6.79	-6.1505	-59.9365	-59.9975
6.795	-6.1514	-59.9365	-59.9975
6.8	-6.1523	-59.9365	-59.9975
6.805	-6.1532	-59.9365	-59.9975
6.81	-6.1541	-59.9365	-59.9975
6.815	-6.155	-59.9365	-59.9975
6.82	-6.1559	-59.9365	-59.9975
6.825	-6.1568	-59.9365	-59.9975
6.83	-6.1576	-59.9365	-59.9975
6.835	-6.1585	-59.9365	-59.9975
6.84	-6.1594	-59.9365	-59.9975
6.845	-6.1603	-59.9365	-59.9975
6.85	-6.1612	-59.9365	-59.9975
6.855	-6.1621	-59.9365	-59.9975
6.86	-6.163	-59.9365	-59.9975
6.865	-6.1639	-59.9365	-59.9975
6.87	-6.1647	-59.9365	-59.9975
6.875	-6.1656	-59.9365	-59.9975
6.88	-6.1665	-59.9365	-59.9975
6.885	-6.1674	-59.9365	-59.9975
6.89	-6.1683	-59.9365	-59.9975
6.895	-6.1692	-59.9365	-59.9975
6.9	-6.1701	-59.9365	-59.9975
6.905	-6.1709	-59.9365	-59.9975
6.91	-6.1718	-59.9365	-59.9975
6.915	-6.1727	-59.9365	-59.9975
6.92	-6.1736	-59.9365	-59.9975
6.925	-6.1745	-59.9365	-59.9975
6.93	-6.1754	-59.9365	-59.9975
6.935	-6.1763	-59.9365	-59.9975
6.94	-6.1771	-59.9365	-59.9975
6.945	-6.178	-59.9365	-59.9975
6.95	-6.1789	-59.9365	-59.9975
6.955	-6.1798	-59.9365	-59.9975
6.96	-6.1807	-59.9365	-59.9975
6.965	-6.1815	-59.9365	-59.9975
6.97	-6.1824	-59.9365	-59.9975
6.975	-6.1833	-59.9365	-59.9975
6.98	-6.1842	-59.9365	-59.9975
6.985	-6.1851	-59.9365	-59.9975
6.99	-6.1859	-59.9365	-59.9975
6.995	-6.1868	-59.9365	-59.9975
7	-6.1877	-59.9365	-59.9975
7.005	-6.1886	-59.9365	-59.9975
7.01	-6.1895	-59.9365	-59.9975
7.015	-6.1903	-59.9365	-59.9975
7.02	-6.1912	-59.9365	-59.9975
7.025	-6.1921	-59.9365	-59.9975
7.03	-6.193	-59.9365	-59.9975
7.035	-6.1939	-59.9365	-59.9975
7.04	-6.1947	-59.9365	-59.9975
7.045	-6.1956	-59.9365	-59.9975
7.05	-6.1965	-59.9365	-59.9975
7.055	-6.1974	-59.9365	-59.9975
7.06	-6.1982	-59.9365	-59.9975
7.065	-6.1991	-59.9365	-59.9975
7.07	-6.2	-59.9365	-59.9975
7.075	-6.2009	-59.9365	-59.9975
7.08	-6.2017	-59.9365	-59.9975
7.085	-6.2026	-59.9365	-59.9975
7.09	-6.2035	-59.9365	-59.9975
7.095	-6.2044	-59.9365	-59.9975
7.1	-6.2052	-59.9365	-59.9975
7.105	-6.2061	-59.9365	-59.9975
7.11	-6.207	-59.9365	-59.9975
7.115	-6.2079	-59.9365	-59.9975
7.12	-6.2087	-59.9365	-59.9975
7.125	-6.2096	-59.9365	-59.9975
7.13	-6.2105	-59.9365	-59.9975
7.135	-6.2113	-59.9365	-59.9975
7.14	-6.2122	-59.9365	-59.9975
7.145	-6.2131	-59.9365	-59.9975
7.15	-6.214	-59.9365	-59.9975
7.155	-6.2148	-59.9365	-59.9975
7.16	-6.2157	-59.9365	-59.9975
7.165	-6.2166	-59.9365	-59.9975
7.17	-6.2174	-59.9365	-59.9975
7.175	-6.2183	-59.9365	-59.9975
7.18	-6.2192	-59.9365	-59.9975
7.185	-6.22	-59.9365	-59.9975
7.19	-6.2209	-59.9365	-59.9975
7.195	-6.2218	-59.9365	-59.9975
7.2	-6.2226	-59.9365	-59.9975
7.205	-6.2235	-59.9365	-59.9975
7.21	-6.2244	-59.9365	-59.9975
7.215	-6.2252	-59.9365	-59.9975
7.22	-6.2261	-59.9365	-59.9975
7.225	-6.227	-59.9365	-59.9975
7.23	-6.2278	-59.9365	-59.9975
7.235	-6.2287	-59.9365	-59.9975
7.24	-6.2296	-59.9365	-59.9975
7.245	-6.2304	-59.9365	-59.9975
7.25	-6.2313	-59.9365	-59.9975
7.255	-6.2322	-59.9365	-59.9975
7.26	-6.233	-59.9365	-59.9975
7.265	-6.2339	-59.9365	-59.9975
7.27	-6.2348	-59.9365	-59.9975
7.275	-6.2356	-59.9365	-59.9975
7.28	-6.2365	-59.9365	-59.9975
7.285	-6.2373	-59.9365	-59.9975
7.29	-6.2382	-59.9365	-59.9975
7.295	-6.2391	-59.9365	-59.9975
7.3	-6.2399	-59.9365	-59.9975
7.305	-6.2408	-59.9365	-59.9975
7.31	-6.2417	-59.9365	-59.9975
7.315	-6.2425	-59.9365	-59.9975
7.32	-6.2434	-59.9365	-59.9975
7.325	-6.2442	-59.9365	-59.9975
7.33	-6.2451	-59.9365	-59.9975
7.335	-6.2459	-59.9365	-59.9975
7.34	-6.2468	-59.9365	-59.9975
7.345	-6.2477	-59.9365	-59.9975
7.35	-6.2485	-59.9365	-59.9975
7.355	-6.2494	-59.9365	-59.9975
7.36	-6.2502	-59.9365	-59.9975
7.365	-6.2511	-59.9365	-59.9975
7.37	-6.252	-59.9365	-59.9975
7.375	-6.2528	-59.9365	-59.9975
7.38	-6.2537	-59.9365	-59.9975
7.385	-6.2545	-59.9365	-59.9975
7.39	-6.2554	-59.9365	-59.9975
7.395	-6.2562	-59.9365	-59.9975
7.4	-6.2571	-59.9365	-59.9975
7.405	-6.2579	-59.9365	-59.9975
7.41	-6.2588	-59.9365	-59.9975
7.415	-6.2597	-59.9365	-59.9975
7.42	-6.2605	-59.9365	-59.9975
7.425	-6.2614	-59.9365	-59.9975
7.43	-6.2622	-59.9365	-59.9975
7.435	-6.2631	-59.9365	-59.9975
7.44	-6.2639	-59.9365	-59.9975
7.445	-6.2648	-59.9365	-59.9975
7.45	-6.2656	-59.9365	-59.9975
7.455	-6.2665	-59.9365	-59.9975
7.46	-6.2673	-59.9365	-59.9975
7.465	-6.2682	-59.9365	-59.9975
7.47	-6.269	-59.9365	-59.9975
7.475	-6.2699	-59.9365	-59.9975
7.48	-6.2707	-59.9365	-59.9975
7.485	-6.2716	-59.9365	-59.9975
7.49	-6.2724	-59.9365	-59.9975
7.495	-6.2733	-59.9365	-59.9975
7.5	-6.2741	-59.9365	-59.9975
7.505	-6.275	-59.9365	-59.9975
7.51	-6.2758	-59.9365	-59.9975
7.515	-6.2767	-59.9365	-59.9975
7.52	-6.2775	-59.9365	-59.9975
7.525	-6.2784	-59.9365	-59.9975
7.53	-6.2792	-59.9365	-59.9975
7.535	-6.2801	-59.9365	-59.9975
7.54	-6.2809	-59.9365	-59.9975
7.545	-6.2818	-59.9365	-59.9975
7.55	-6.2826	-59.9365	-59.9975
7.555	-6.2835	-59.9365	-59.9975
7.56	-6.2843	-59.9365	-59.9975
7.565	-6.2851	-59.9365	-59.9975
7.57	-6.286	-59.9365	-59.9975
7.575	-6.2868	-59.9365	-59.9975
7.58	-6.2877	-59.9365	-59.9975
7.585	-6.2885	-59.9365	-59.9975
7.59	-6.2894	-59.9365	-59.9975
7.595	-6.2902	-59.9365	-59.9975
7.6	-6.2911	-59.9365	-59.9975
7.605	-6.2919	-59.9365	-59.9975
7.61	-6.2927	-59.9365	-59.9975
7.615	-6.2936	-59.9365	-59.9975
7.62	-6.2944	-59.9365	-59.9975
7.625	-6.2953	-59.9365	-59.9975
7.63	-6.2961	-59.9365	-59.9975
7.635	-6.2969	-59.9365	-59.9975
7.64	-6.2978	-59.9365	-59.9975
7.645	-6.2986	-59.9365	-59.9975
7.65	-6.2995	-59.9365	-59.9975
7.655	-6.3003	-59.9365	-59.9975
7.66	-6.3011	-59.9365	-59.9975
7.665	-6.302	-59.9365	-59.9975
7.67	-6.3028	-59.9365	-59.9975
7.675	-6.3037	-59.9365	-59.9975
7.68	-6.3045	-59.9365	-59.9975
7.685	-6.3053	-59.9365	-59.9975
7.69	-6.3062	-59.9365	-59.9975
7.695	-6.307	-59.9365	-59.9975
7.7	-6.3078	-59.9365	-59.9975
7.705	-6.3087	-59.9365	-59.9975
7.71	-6.3095	-59.9365	-59.9975
7.715	-6.3104	-59.9365	-59.9975
7.72	-6.3112	-59.9365	-59.9975
7.725	-6.312	-59.9365	-59.9975
7.73	-6.3129	-59.9365	-59.9975
7.735	-6.3137	-59.9365	-59.9975
7.74	-6.3145	-59.9365	-59.9975
7.745	-6.3154	-59.9365	-59.9975
7.75	-6.3162	-59.9365	-59.9975
7.755	-6.317	-59.9365	-59.9975
7.76	-6.3179	-59.9365	-59.9975
7.765	-6.3187	-59.9365	-59.9975
7.77	-6.3195	-59.9365	-59.9975
7.775	-6.3204	-59.9365	-59.9975
7.78	-6.3212	-59.9365	-59.9975
7.785	-6.322	-59.9365	-59.9975
7.79	-6.3229	-59.9365	-59.9975
7.795	-6.3237	-59.9365	-59.9975
7.8	-6.3245	-59.9365	-59.9975
7.805	-6.3253	-59.9365	-59.9975
7.81	-6.3262	-59.9365	-59.9975
7.815	-6.327	-59.9365	-59.9975
7.82	-6.3278	-59.9365	-59.9975
7.825	-6.3287	-59.9365	-59.9975
7.83	-6.3295	-59.9365	-59.9975
7.835	-6.3303	-59.9365	-59.9975
7.84	-6.3311	-59.9365	-59.9975
7.845	-6.332	-59.9365	-59.9975
7.85	-6.3328	-59.9365	-59.9975
7.855	-6.3336	-59.9365	-59.9975
7.86	-6.3345	-59.9365	-59.9975
7.865	-6.3353	-59.9365	-59.9975
7.87	-6.3361	-59.9365	-59.9975
7.875	-6.3369	-59.9365	-59.9975
7.88	-6.3378	-59.9365	-59.9975
7.885	-6.3386	-59.9365	-59.9975
7.89	-6.3394	-59.9365	-59.9975
7.895	-6.3402	-59.9365	-59.9975
7.9	-6.3411	-59.9365	-59.9975
7.905	-6.3419	-59.9365	-59.9975
7.91	-6.3427	-59.9365	-59.9975
7.915	-6.3435	-59.9365	-59.9975
7.92	-6.3443	-59.9365	-59.9975
7.925	-6.3452	-59.9365	-59.9975
7.93	-6.346	-59.9365	-59.9975
7.935	-6.3468	-59.9365	-59.9975
7.94	-6.3476	-59.9365	-59.9975
7.945	-6.3485	-59.9365	-59.9975
7.95	-6.3493	-59.9365	-59.9975
7.955	-6.3501	-59.9365	-59.9975
7.96	-6.3509	-59.9365	-59.9975
7.965	-6.3517	-59.9365	-59.9975
7.97	-6.3526	-59.9365	-59.9975
7.975	-6.3534	-59.9365	-59.9975
7.98	-6.3542	-59.9365	-59.9975
7.985	-6.355	-59.9365	-59.9975
7.99	-6.3558	-59.9365	-59.9975
7.995	-6.3566	-59.9365	-59.9975
8	-6.3575	-59.9365	-59.9975
8.005	-6.3583	-59.9365	-59.9975
8.01	-6.3591	-59.9365	-59.9975
8.015	-6.3599	-59.9365	-59.9975
8.02	-6.3607	-59.9365	-59.9975
8.025	-6.3615	-59.9365	-59.9975
8.03	-6.3624	-59.9365	-59.9975
8.035	-6.3632	-59.9365	-59.9975
8.04	-6.364	-59.9365	-59.9975
8.045	-6.3648	-59.9365	-59.9975
8.05	-6.3656	-59.9365	-59.9975
8.055	-6.3664	-59.9365	-59.9975
8.06	-6.3673	-59.9365	-59.9975
8.065	-6.3681	-59.9365	-59.9975
8.07	-6.3689	-59.9365	-59.9975
8.075	-6.3697	-59.9365	-59.9975
8.08	-6.3705	-59.9365	-59.9975
8.085	-6.3713	-59.9365	-59.9975
8.09	-6.3721	-59.9365	-59.9975
8.095	-6.3729	-59.9365	-59.9975
8.1	-6.3737	-59.9365	-59.9975
8.105	-6.3746	-59.9365	-59.9975
8.11	-6.3754	-59.9365	-59.9975
8.115	-6.3762	-59.9365	-59.9975
8.12	-6.377	-59.9365	-59.9975
8.125	-6.3778	-59.9365	-59.9975
8.13	-6.3786	-59.9365	-59.9975
8.135	-6.3794	-59.9365	-59.9975
8.14	-6.3802	-59.9365	-59.9975
8.145	-6.381	-59.9365	-59.9975
8.15	-6.3818	-59.9365	-59.9975
8.155	-6.3826	-59.9365	-59.9975
8.16	-6.3835	-59.9365	-59.9975
8.165	-6.3843	-59.9365	-59.9975
8.17	-6.3851	-59.9365	-59.9975
8.175	-6.3859	-59.9365	-59.9975
8.18	-6.3867	-59.9365	-59.9975
8.185	-6.3875	-59.9365	-59.9975
8.19	-6.3883	-59.9365	-59.9975
8.195	-6.3891	-59.9365	-59.9975
8.2	-6.3899	-59.9365	-59.9975
8.205	-6.3907	-59.9365	-59.9975
8.21	-6.3915	-59.9365	-59.9975
8.215	-6.3923	-59.9365	-59.9975
8.22	-6.3931	-59.9365	-59.9975
8.225	-6.3939	-59.9365	-59.9975
8.23	-6.3947	-59.9365	-59.9975
8.235	-6.3955	-59.9365	-59.9975
8.24	-6.3963	-59.9365	-59.9975
8.245	-6.3971	-59.9365	-59.9975
8.25	-6.3979	-59.9365	-59.9975
8.255	-6.3987	-59.9365	-59.9975
8.26	-6.3995	-59.9365	-59.9975
8.265	-6.4003	-59.9365	-59.9975
8.27	-6.4011	-59.9365	-59.9975
8.275	-6.4019	-59.9365	-59.9975
8.28	-6.4027	-59.9365	-59.9975
8.285	-6.4035	-59.9365	-59.9975
8.29	-6.4043	-59.9365	-59.9975
8.295	-6.4051	-59.9365	-59.9975
8.3	-6.4059	-59.9365	-59.9975
8.305	-6.4067	-59.9365	-59.9975
8.31	-6.4075	-59.9365	-59.9975
8.315	-6.4083	-59.9365	-59.9975
8.32	-6.4091	-59.9365	-59.9975
8.325	-6.4099	-59.9365	-59.9975
8.33	-6.4107	-59.9365	-59.9975
8.335	-6.4115	-59.9365	-59.9975
8.34	-6.4123	-59.9365	-59.9975
8.345	-6.4131	-59.9365	-59.9975
8.35	-6.4139	-59.9365	-59.9975
8.355	-6.4147	-59.9365	-59.9975
8.36	-6.4155	-59.9365	-59.9975
8.365	-6.4163	-59.9365	-59.9975
8.37	-6.4171	-59.9365	-59.9975
8.375	-6.4179	-59.9365	-59.9975
8.38	-6.4186	-59.9365	-59.9975
8.385	-6.4194	-59.9365	-59.9975
8.39	-6.4202	-59.9365	-59.9975
8.395	-6.421	-59.9365	-59.9975
8.4	-6.4218	-59.9365	-59.9975
8.405	-6.4226	-59.9365	-59.9975
8.41	-6.4234	-59.9365	-59.9975
8.415	-6.4242	-59.9365	-59.9975
8.42	-6.425	-59.9365	-59.9975
8.425	-6.4258	-59.9365	-59.9975
8.43	-6.4266	-59.9365	-59.9975
8.435	-6.4273	-59.9365	-59.9975
8.44	-6.4281	-59.9365	-59.9975
8.445	-6.4289	-59.9365	-59.9975
8.45	-6.4297	-59.9365	-59.9975
8.455	-6.4305	-59.9365	-59.9975
8.46	-6.4313	-59.9365	-59.9975
8.465	-6.4321	-59.9365	-59.9975
8.47	-6.4329	-59.9365	-59.9975
8.475	-6.4336	-59.9365	-59.9975
8.48	-6.4344	-59.9365	-59.9975
8.485	-6.4352	-59.9365	-59.9975
8.49	-6.436	-59.9365	-59.9975
8.495	-6.4368	-59.9365	-59.9975
8.5	-6.4376	-59.9365	-59.9975
8.505	-6.4384	-59.9365	-59.9975
8.51	-6.4391	-59.9365	-59.9975
8.515	-6.4399	-59.9365	-59.9975
8.52	-6.4407	-59.9365	-59.9975
8.525	-6.4415	-59.9365	-59.9975
8.53	-6.4423	-59.9365	-59.9975
8.535	-6.4431	-59.9365	-59.9975
8.54	-6.4438	-59.9365	-59.9975
8.545	-6.4446	-59.9365	-59.9975
8.55	-6.4454	-59.9365	-59.9975
8.555	-6.4462	-59.9365	-59.9975
8.56	-6.447	-59.9365	-59.9975
8.565	-6.4477	-59.9365	-59.9975
8.57	-6.4485	-59.9365	-59.9975
8.575	-6.4493	-59.9365	-59.9975
8.58	-6.4501	-59.9365	-59.9975
8.585	-6.4509	-59.9365	-59.9975
8.59	-6.4516	-59.9365	-59.9975
8.595	-6.4524	-59.9365	-59.9975
8.6	-6.4532	-59.9365	-59.9975
8.605	-6.454	-59.9365	-59.9975
8.61	-6.4548	-59.9365	-59.9975
8.615	-6.4555	-59.9365	-59.9975
8.62	-6.4563	-59.9365	-59.9975
8.625	-6.4571	-59.9365	-59.9975
8.63	-6.4579	-59.9365	-59.9975
8.635	-6.4586	-59.9365	-59.9975
8.64	-6.4594	-59.9365	-59.9975
8.645	-6.4602	-59.9365	-59.9975
8.65	-6.461	-59.9365	-59.9975
8.655	-6.4617	-59.9365	-59.9975
8.66	-6.4625	-59.9365	-59.9975
8.665	-6.4633	-59.9365	-59.9975
8.67	-6.4641	-59.9365	-59.9975
8.675	-6.4648	-59.9365	-59.9975
8.68	-6.4656	-59.9365	-59.9975
8.685	-6.4664	-59.9365	-59.9975
8.69	-6.4672	-59.9365	-59.9975
8.695	-6.4679	-59.9365	-59.9975
8.7	-6.4687	-59.9365	-59.9975
8.705	-6.4695	-59.9365	-59.9975
8.71	-6.4702	-59.9365	-59.9975
8.715	-6.471	-59.9365	-59.9975
8.72	-6.4718	-59.9365	-59.9975
8.725	-6.4725	-59.9365	-59.9975
8.73	-6.4733	-59.9365	-59.9975
8.735	-6.4741	-59.9365	-59.9975
8.74	-6.4749	-59.9365	-59.9975
8.745	-6.4756	-59.9365	-59.9975
8.75	-6.4764	-59.9365	-59.9975
8.755	-6.4772	-59.9365	-59.9975
8.76	-6.4779	-59.9365	-59.9975
8.765	-6.4787	-59.9365	-59.9975
8.77	-6.4795	-59.9365	-59.9975
8.775	-6.4802	-59.9365	-59.9975
8.78	-6.481	-59.9365	-59.9975
8.785	-6.4818	-59.9365	-59.9975
8.79	-6.4825	-59.9365	-59.9975
8.795	-6.4833	-59.9365	-59.9975
8.8	-6.4841	-59.9365	-59.9975
8.805	-6.4848	-59.9365	-59.9975
8.81	-6.4856	-59.9365	-59.9975
8.815	-6.4863	-59.9365	-59.9975
8.82	-6.4871	-59.9365	-59.9975
8.825	-6.4879	-59.9365	-59.9975
8.83	-6.4886	-59.9365	-59.9975
8.835	-6.4894	-59.9365	-59.9975
8.84	-6.4902	-59.9365	-59.9975
8.845	-6.4909	-59.9365	-59.9975
8.85	-6.4917	-59.9365	-59.9975
8.855	-6.4924	-59.9365	-59.9975
8.86	-6.4932	-59.9365	-59.9975
8.865	-6.494	-59.9365	-59.9975
8.87	-6.4947	-59.9365	-59.9975
8.875	-6.4955	-59.9365	-59.9975
8.88	-6.4962	-59.9365	-59.9975
8.885	-6.497	-59.9365	-59.9975
8.89	-6.4978	-59.9365	-59.9975
8.895	-6.4985	-59.9365	-59.9975
8.9	-6.4993	-59.9365	-59.9975
8.905	-6.5	-59.9365	-59.9975
8.91	-6.5008	-59.9365	-59.9975
8.915	-6.5015	-59.9365	-59.9975
8.92	-6.5023	-59.9365	-59.9975
8.925	-6.5031	-59.9365	-59.9975
8.93	-6.5038	-59.9365	-59.9975
8.935	-6.5046	-59.9365	-59.9975
8.94	-6.5053	-59.9365	-59.9975
8.945	-6.5061	-59.9365	-59.9975
8.95	-6.5068	-59.9365	-59.9975
8.955	-6.5076	-59.9365	-59.9975
8.96	-6.5083	-59.9365	-59.9975
8.965	-6.5091	-59.9365	-59.9975
8.97	-6.5099	-59.9365	-59.9975
8.975	-6.5106	-59.9365	-59.9975
8.98	-6.5114	-59.9365	-59.9975
8.985	-6.5121	-59.9365	-59.9975
8.99	-6.5129	-59.9365	-59.9975
8.995	-6.5136	-59.9365	-59.9975
9	-6.5144	-59.9365	-59.9975
9.005	-6.5151	-59.9365	-59.9975
9.01	-6.5159	-59.9365	-59.9975
9.015	-6.5166	-59.9365	-59.9975
9.02	-6.5174	-59.9365	-59.9975
9.025	-6.5181	-59.9365	-59.9975
9.03	-6.5189	-59.9365	-59.9975
9.035	-6.5196	-59.9365	-59.9975
9.04	-6.5204	-59.9365	-59.9975
9.045	-6.5211	-59.9365	-59.9975
9.05	-6.5219	-59.9365	-59.9975
9.055	-6.5226	-59.9365	-59.9975
9.06	-6.5234	-59.9365	-59.9975
9.065	-6.5241	-59.9365	-59.9975
9.07	-6.5248	-59.9365	-59.9975
9.075	-6.5256	-59.9365	-59.9975
9.08	-6.5263	-59.9365	-59.9975
9.085	-6.5271	-59.9365	-59.9975
9.09	-6.5278	-59.9365	-59.9975
9.095	-6.5286	-59.9365	-59.9975
9.1	-6.5293	-59.9365	-59.9975
9.105	-6.5301	-59.9365	-59.9975
9.11	-6.5308	-59.9365	-59.9975
9.115	-6.5315	-59.9365	-59.9975
9.12	-6.5323	-59.9365	-59.9975
9.125	-6.533	-59.9365	-59.9975
9.13	-6.5338	-59.9365	-59.9975
9.135	-6.5345	-59.9365	-59.9975
9.14	-6.5353	-59.9365	-59.9975
9.145	-6.536	-59.9365	-59.9975
9.15	-6.5367	-59.9365	-59.9975
9.155	-6.5375	-59.9365	-59.9975
9.16	-6.5382	-59.9365	-59.9975
9.165	-6.539	-59.9365	-59.9975
9.17	-6.5397	-59.9365	-59.9975
9.175	-6.5404	-59.9365	-59.9975
9.18	-6.5412	-59.9365	-59.9975
9.185	-6.5419	-59.9365	-59.9975
9.19	-6.5427	-59.9365	-59.9975
9.195	-6.5434	-59.9365	-59.9975
9.2	-6.5441	-59.9365	-59.9975
9.205	-6.5449	-59.9365	-59.9975
9.21	-6.5456	-59.9365	-59.9975
9.215	-6.5463	-59.9365	-59.9975
9.22	-6.5471	-59.9365	-59.9975
9.225	-6.5478	-59.9365	-59.9975
9.23	-6.5485	-59.9365	-59.9975
9.235	-6.5493	-59.9365	-59.9975
9.24	-6.55	-59.9365	-59.9975
9.245	-6.5508	-59.9365	-59.9975
9.25	-6.5515	-59.9365	-59.9975
9.255	-6.5522	-59.9365	-59.9975
9.26	-6.553	-59.9365	-59.9975
9.265	-6.5537	-59.9365	-59.9975
9.27	-6.5544	-59.9365	-59.9975
9.275	-6.5552	-59.9365	-59.9975
9.28	-6.5559	-59.9365	-59.9975
9.285	-6.5566	-59.9365	-59.9975
9.29	-6.5573	-59.9365	-59.9975
9.295	-6.5581	-59.9365	-59.9975
9.3	-6.5588	-59.9365	-59.9975
9.305	-6.5595	-59.9365	-59.9975
9.31	-6.5603	-59.9365	-59.9975
9.315	-6.561	-59.9365	-59.9975
9.32	-6.5617	-59.9365	-59.9975
9.325	-6.5625	-59.9365	-59.9975
9.33	-6.5632	-59.9365	-59.9975
9.335	-6.5639	-59.9365	-59.9975
9.34	-6.5646	-59.9365	-59.9975
9.345	-6.5654	-59.9365	-59.9975
9.35	-6.5661	-59.9365	-59.9975
9.355	-6.5668	-59.9365	-59.9975
9.36	-6.5675	-59.9365	-59.9975
9.365	-6.5683	-59.9365	-59.9975
9.37	-6.569	-59.9365	-59.9975
9.375	-6.5697	-59.9365	-59.9975
9.38	-6.5705	-59.9365	-59.9975
9.385	-6.5712	-59.9365	-59.9975
9.39	-6.5719	-59.9365	-59.9975
9.395	-6.5726	-59.9365	-59.9975
9.4	-6.5733	-59.9365	-59.9975
9.405	-6.5741	-59.9365	-59.9975
9.41	-6.5748	-59.9365	-59.9975
9.415	-6.5755	-59.9365	-59.9975
9.42	-6.5762	-59.9365	-59.9975
9.425	-6.577	-59.9365	-59.9975
9.43	-6.5777	-59.9365	-59.9975
9.435	-6.5784	-59.9365	-59.9975
9.44	-6.5791	-59.9365	-59.9975
9.445	-6.5798	-59.9365	-59.9975
9.45	-6.5806	-59.9365	-59.9975
9.455	-6.5813	-59.9365	-59.9975
9.46	-6.582	-59.9365	-59.9975
9.465	-6.5827	-59.9365	-59.9975
9.47	-6.5834	-59.9365	-59.9975
9.475	-6.5842	-59.9365	-59.9975
9.48	-6.5849	-59.9365	-59.9975
9.485	-6.5856	-59.9365	-59.9975
9.49	-6.5863	-59.9365	-59.9975
9.495	-6.587	-59.9365	-59.9975
9.5	-6.5877	-59.9365	-59.9975
9.505	-6.5885	-59.9365	-59.9975
9.51	-6.5892	-59.9365	-59.9975
9.515	-6.5899	-59.9365	-59.9975
9.52	-6.5906	-59.9365	-59.9975
9.525	-6.5913	-59.9365	-59.9975
9.53	-6.592	-59.9365	-59.9975
9.535	-6.5928	-59.9365	-59.9975
9.54	-6.5935	-59.9365	-59.9975
9.545	-6.5942	-59.9365	-59.9975
9.55	-6.5949	-59.9365	-59.9975
9.555	-6.5956	-59.9365	-59.9975
9.56	-6.5963	-59.9365	-59.9975
9.565	-6.597	-59.9365	-59.9975
9.57	-6.5977	-59.9365	-59.9975
9.575	-6.5985	-59.9365	-59.9975
9.58	-6.5992	-59.9365	-59.9975
9.585	-6.5999	-59.9365	-59.9975
9.59	-6.6006	-59.9365	-59.9975
9.595	-6.6013	-59.9365	-59.9975
9.6	-6.602	-59.9365	-59.9975
9.605	-6.6027	-59.9365	-59.9975
9.61	-6.6034	-59.9365	-59.9975
9.615	-6.6041	-59.9365	-59.9975
9.62	-6.6048	-59.9365	-59.9975
9.625	-6.6056	-59.9365	-59.9975
9.63	-6.6063	-59.9365	-59.9975
9.635	-6.607	-59.9365	-59.9975
9.64	-6.6077	-59.9365	-59.9975
9.645	-6.6084	-59.9365	-59.9975
9.65	-6.6091	-59.9365	-59.9975
9.655	-6.6098	-59.9365	-59.9975
9.66	-6.6105	-59.9365	-59.9975
9.665	-6.6112	-59.9365	-59.9975
9.67	-6.6119	-59.9365	-59.9975
9.675	-6.6126	-59.9365	-59.9975
9.68	-6.6133	-59.9365	-59.9975
9.685	-6.614	-59.9365	-59.9975
9.69	-6.6147	-59.9365	-59.9975
9.695	-6.6154	-59.9365	-59.9975
9.7	-6.6161	-59.9365	-59.9975
9.705	-6.6168	-59.9365	-59.9975
9.71	-6.6175	-59.9365	-59.9975
9.715	-6.6182	-59.9365	-59.9975
9.72	-6.6189	-59.9365	-59.9975
9.725	-6.6196	-59.9365	-59.9975
9.73	-6.6203	-59.9365	-59.9975
9.735	-6.621	-59.9365	-59.9975
9.74	-6.6217	-59.9365	-59.9975
9.745	-6.6224	-59.9365	-59.9975
9.75	-6.6231	-59.9365	-59.9975
9.755	-6.6238	-59.9365	-59.9975
9.76	-6.6245	-59.9365	-59.9975
9.765	-6.6252	-59.9365	-59.9975
9.77	-6.6259	-59.9365	-59.9975
9.775	-6.6266	-59.9365	-59.9975
9.78	-6.6273	-59.9365	-59.9975
9.785	-6.628	-59.9365	-59.9975
9.79	-6.6287	-59.9365	-59.9975
9.795	-6.6294	-59.9365	-59.9975
9.8	-6.6301	-59.9365	-59.9975
9.805	-6.6308	-59.9365	-59.9975
9.81	-6.6315	-59.9365	-59.9975
9.815	-6.6322	-59.9365	-59.9975
9.82	-6.6329	-59.9365	-59.9975
9.825	-6.6336	-59.9365	-59.9975
9.83	-6.6343	-59.9365	-59.9975
9.835	-6.635	-59.9365	-59.9975
9.84	-6.6357	-59.9365	-59.9975
9.845	-6.6364	-59.9365	-59.9975
9.85	-6.6371	-59.9365	-59.9975
9.855	-6.6378	-59.9365	-59.9975
9.86	-6.6384	-59.9365	-59.9975
9.865	-6.6391	-59.9365	-59.9975
9.87	-6.6398	-59.9365	-59.9975
9.875	-6.6405	-59.9365	-59.9975
9.88	-6.6412	-59.9365	-59.9975
9.885	-6.6419	-59.9365	-59.9975
9.89	-6.6426	-59.9365	-59.9975
9.895	-6.6433	-59.9365	-59.9975
9.9	-6.644	-59.9365	-59.9975
9.905	-6.6447	-59.9365	-59.9975
9.91	-6.6453	-59.9365	-59.9975
9.915	-6.646	-59.9365	-59.9975
9.92	-6.6467	-59.9365	-59.9975
9.925	-6.6474	-59.9365	-59.9975
9.93	-6.6481	-59.9365	-59.9975
9.935	-6.6488	-59.9365	-59.9975
[truncated: 13 more rows]

## Sheet: Data_Fig13C
	Voltage [mV]
time [s]	300 pA	600 pA	900 pA
-1.99	-60	-60	-60
-1.94	-60	-60	-60
-1.89	-60	-60	-60
-1.84	-60	-60	-60
-1.79	-60	-60	-60
-1.74	-60	-60	-60
-1.69	-60	-60	-60
-1.64	-60	-60	-60
-1.59	-60	-60	-60
-1.54	-60	-60	-60
0	-60	-60	-60
0.005	11.144	84.6418	159.039
0.01	78.9467	222.694	69.6067
0.015	145.547	58.2287	37.3648
0.02	172.878	38.4776	36.5588
0.025	72.488	36.72	35.8586
0.03	38.4121	35.416	35.2412
0.035	32.2918	34.3065	34.6938
0.04	30.2737	33.351	34.2058
0.045	28.9212	32.5205	33.7688
0.05	27.8109	31.7932	33.3757
0.055	26.8651	31.1519	33.0206
0.06	26.0486	30.5831	32.6985
0.065	25.3371	30.076	32.4054
0.07	24.7122	29.6216	32.1376
0.075	24.1596	29.2127	31.892
0.08	23.6681	28.8432	31.6662
0.085	23.2286	28.5082	31.4577
0.09	22.8339	28.2033	31.2647
0.095	22.4778	27.9249	31.0854
0.1	22.1554	27.6698	30.9183
0.105	-1.1765	-1.1831	-0.9076
0.11	-2.0678	-1.2838	-0.9558
0.115	-2.1756	-1.3448	-1.0047
0.12	-2.2637	-1.4072	-1.0549
0.125	-2.3527	-1.4709	-1.1062
0.13	-2.4431	-1.5359	-1.1586
0.135	-2.5348	-1.602	-1.2121
0.14	-2.6278	-1.6692	-1.2665
0.145	-2.722	-1.7375	-1.3219
0.15	-2.8174	-1.8067	-1.3781
0.155	-2.9137	-1.8768	-1.435
0.16	-3.0111	-1.9476	-1.4927
0.165	-3.1093	-2.0192	-1.5509
0.17	-3.2084	-2.0914	-1.6097
0.175	-3.3081	-2.1641	-1.6688
0.18	-3.4086	-2.2373	-1.7284
0.185	-3.5096	-2.3109	-1.7882
0.19	-3.6111	-2.3847	-1.8482
0.195	-3.7131	-2.4588	-1.9084
0.2	-3.8154	-2.5329	-1.9686
0.205	-3.9179	-2.6072	-2.0287
0.21	-4.0207	-2.6814	-2.0887
0.215	-4.1237	-2.7554	-2.1485
0.22	-4.2267	-2.8294	-2.2081
0.225	-4.3297	-2.903	-2.2674
0.23	-4.4327	-2.9764	-2.3263
0.235	-4.5356	-3.0494	-2.3847
0.24	-4.6384	-3.1219	-2.4427
0.245	-4.7409	-3.194	-2.5001
0.25	-4.8432	-3.2655	-2.5569
0.255	-4.9452	-3.3365	-2.6131
0.26	-5.0468	-3.4068	-2.6686
0.265	-5.148	-3.4764	-2.7233
0.27	-5.2488	-3.5453	-2.7774
0.275	-5.3491	-3.6134	-2.8306
0.28	-5.4488	-3.6808	-2.8831
0.285	-5.5481	-3.7473	-2.9347
0.29	-5.6468	-3.813	-2.9854
0.295	-5.7448	-3.8778	-3.0353
0.3	-5.8423	-3.9417	-3.0843
0.305	-5.9391	-4.0047	-3.1324
0.31	-6.0352	-4.0668	-3.1797
0.315	-6.1306	-4.1279	-3.226
0.32	-6.2253	-4.1881	-3.2713
0.325	-6.3193	-4.2473	-3.3158
0.33	-6.4125	-4.3055	-3.3594
0.335	-6.505	-4.3628	-3.402
0.34	-6.5967	-4.419	-3.4437
0.345	-6.6877	-4.4743	-3.4845
0.35	-6.7779	-4.5287	-3.5244
0.355	-6.8672	-4.582	-3.5635
0.36	-6.9558	-4.6344	-3.6016
0.365	-7.0436	-4.6858	-3.6388
0.37	-7.1306	-4.7362	-3.6752
0.375	-7.2168	-4.7857	-3.7108
0.38	-7.3022	-4.8343	-3.7455
0.385	-7.3868	-4.8819	-3.7794
0.39	-7.4706	-4.9286	-3.8124
0.395	-7.5536	-4.9743	-3.8447
0.4	-7.6358	-5.0192	-3.8762
0.405	-7.7172	-5.0631	-3.9069
0.41	-7.7978	-5.1062	-3.9369
0.415	-7.8777	-5.1485	-3.9661
0.42	-7.9568	-5.1898	-3.9947
0.425	-8.0351	-5.2304	-4.0225
0.43	-8.1127	-5.2701	-4.0496
0.435	-8.1895	-5.309	-4.076
0.44	-8.2656	-5.3471	-4.1018
0.445	-8.341	-5.3844	-4.127
0.45	-8.4156	-5.421	-4.1515
0.455	-8.4895	-5.4568	-4.1755
0.46	-8.5628	-5.4919	-4.1988
0.465	-8.6353	-5.5263	-4.2215
0.47	-8.7071	-5.56	-4.2437
0.475	-8.7783	-5.5929	-4.2654
0.48	-8.8488	-5.6252	-4.2865
0.485	-8.9187	-5.6569	-4.3071
0.49	-8.9879	-5.6879	-4.3272
0.495	-9.0565	-5.7183	-4.3468
0.5	-9.1244	-5.748	-4.3659
0.505	-9.1918	-5.7772	-4.3845
0.51	-9.2586	-5.8057	-4.4027
0.515	-9.3247	-5.8337	-4.4205
0.52	-9.3903	-5.8612	-4.4378
0.525	-9.4554	-5.8881	-4.4548
0.53	-9.5199	-5.9145	-4.4713
0.535	-9.5838	-5.9403	-4.4874
0.54	-9.6472	-5.9656	-4.5032
0.545	-9.7101	-5.9905	-4.5186
0.55	-9.7725	-6.0149	-4.5336
0.555	-9.8344	-6.0388	-4.5483
0.56	-9.8958	-6.0622	-4.5627
0.565	-9.9567	-6.0852	-4.5767
0.57	-10.0172	-6.1078	-4.5905
0.575	-10.0772	-6.1299	-4.6039
0.58	-10.1368	-6.1516	-4.617
0.585	-10.1959	-6.173	-4.6298
0.59	-10.2546	-6.1939	-4.6424
0.595	-10.313	-6.2145	-4.6546
0.6	-10.3709	-6.2346	-4.6667
0.605	-10.4284	-6.2545	-4.6784
0.61	-10.4855	-6.274	-4.6899
0.615	-10.5423	-6.2931	-4.7012
0.62	-10.5987	-6.3119	-4.7123
0.625	-10.6548	-6.3304	-4.7231
0.63	-10.7105	-6.3485	-4.7337
0.635	-10.7659	-6.3664	-4.7441
0.64	-10.8209	-6.3839	-4.7542
0.645	-10.8757	-6.4012	-4.7642
0.65	-10.9302	-6.4182	-4.774
0.655	-10.9843	-6.4349	-4.7836
0.66	-11.0382	-6.4513	-4.793
0.665	-11.0918	-6.4675	-4.8023
0.67	-11.1452	-6.4834	-4.8114
0.675	-11.1983	-6.4991	-4.8203
0.68	-11.2511	-6.5145	-4.829
0.685	-11.3037	-6.5297	-4.8376
0.69	-11.3561	-6.5447	-4.846
0.695	-11.4082	-6.5595	-4.8543
0.7	-11.4602	-6.574	-4.8625
0.705	-11.5119	-6.5883	-4.8705
0.71	-11.5635	-6.6024	-4.8784
0.715	-11.6148	-6.6164	-4.8861
0.72	-11.666	-6.6301	-4.8938
0.725	-11.717	-6.6436	-4.9013
0.73	-11.7678	-6.657	-4.9087
0.735	-11.8185	-6.6702	-4.9159
0.74	-11.8691	-6.6832	-4.9231
0.745	-11.9195	-6.696	-4.9301
0.75	-11.9697	-6.7087	-4.9371
0.755	-12.0199	-6.7212	-4.9439
0.76	-12.0699	-6.7336	-4.9507
0.765	-12.1198	-6.7458	-4.9573
0.77	-12.1696	-6.7578	-4.9639
0.775	-12.2193	-6.7697	-4.9704
0.78	-12.269	-6.7815	-4.9768
0.785	-12.3185	-6.7932	-4.9831
0.79	-12.368	-6.8047	-4.9893
0.795	-12.4174	-6.8161	-4.9954
0.8	-12.4668	-6.8273	-5.0015
0.805	-12.5161	-6.8385	-5.0075
0.81	-12.5654	-6.8495	-5.0134
0.815	-12.6146	-6.8604	-5.0192
0.82	-12.6638	-6.8712	-5.025
0.825	-12.7129	-6.8819	-5.0307
0.83	-12.7621	-6.8924	-5.0364
0.835	-12.8112	-6.9029	-5.0419
0.84	-12.8604	-6.9133	-5.0475
0.845	-12.9095	-6.9236	-5.0529
0.85	-12.9587	-6.9338	-5.0583
0.855	-13.0079	-6.9439	-5.0637
0.86	-13.0571	-6.9539	-5.069
0.865	-13.1063	-6.9638	-5.0742
0.87	-13.1556	-6.9736	-5.0794
0.875	-13.2049	-6.9834	-5.0846
0.88	-13.2543	-6.993	-5.0897
0.885	-13.3037	-7.0026	-5.0947
0.89	-13.3532	-7.0121	-5.0997
0.895	-13.4027	-7.0216	-5.1047
0.9	-13.4524	-7.031	-5.1096
0.905	-13.5021	-7.0403	-5.1145
0.91	-13.5519	-7.0495	-5.1193
0.915	-13.6019	-7.0587	-5.1241
0.92	-13.6519	-7.0678	-5.1289
0.925	-13.702	-7.0768	-5.1336
0.93	-13.7523	-7.0858	-5.1383
0.935	-13.8026	-7.0947	-5.143
0.94	-13.8532	-7.1036	-5.1476
0.945	-13.9038	-7.1124	-5.1522
0.95	-13.9546	-7.1212	-5.1568
0.955	-14.0056	-7.1299	-5.1613
0.96	-14.0567	-7.1385	-5.1658
0.965	-14.1079	-7.1471	-5.1703
0.97	-14.1594	-7.1557	-5.1747
0.975	-14.211	-7.1642	-5.1792
0.98	-14.2628	-7.1727	-5.1836
0.985	-14.3148	-7.1811	-5.1879
0.99	-14.3671	-7.1895	-5.1923
0.995	-14.4195	-7.1978	-5.1966
1	-14.4721	-7.2061	-5.2009
1.005	-14.525	-7.2144	-5.2052
1.01	-14.5781	-7.2226	-5.2094
1.015	-14.6314	-7.2308	-5.2137
1.02	-14.685	-7.239	-5.2179
1.025	-14.7388	-7.2471	-5.2221
1.03	-14.7929	-7.2552	-5.2262
1.035	-14.8473	-7.2632	-5.2304
1.04	-14.9019	-7.2713	-5.2345
1.045	-14.9568	-7.2793	-5.2387
1.05	-15.012	-7.2872	-5.2428
1.055	-15.0676	-7.2952	-5.2469
1.06	-15.1234	-7.3031	-5.2509
1.065	-15.1795	-7.311	-5.255
1.07	-15.236	-7.3188	-5.259
1.075	-15.2928	-7.3267	-5.2631
1.08	-15.3499	-7.3345	-5.2671
1.085	-15.4074	-7.3423	-5.2711
1.09	-15.4653	-7.35	-5.2751
1.095	-15.5235	-7.3578	-5.2791
1.1	-15.5821	-7.3655	-5.283
1.105	-15.6411	-7.3732	-5.287
1.11	-15.7004	-7.3809	-5.2909
1.115	-15.7602	-7.3886	-5.2949
1.12	-15.8204	-7.3962	-5.2988
1.125	-15.881	-7.4039	-5.3027
1.13	-15.9421	-7.4115	-5.3066
1.135	-16.0036	-7.4191	-5.3105
1.14	-16.0655	-7.4267	-5.3144
1.145	-16.1279	-7.4342	-5.3183
1.15	-16.1908	-7.4418	-5.3221
1.155	-16.2542	-7.4494	-5.326
1.16	-16.3181	-7.4569	-5.3298
1.165	-16.3824	-7.4644	-5.3337
1.17	-16.4473	-7.4719	-5.3375
1.175	-16.5127	-7.4794	-5.3413
1.18	-16.5787	-7.4869	-5.3452
1.185	-16.6452	-7.4944	-5.349
1.19	-16.7123	-7.5019	-5.3528
1.195	-16.78	-7.5093	-5.3566
1.2	-16.8482	-7.5168	-5.3604
1.205	-16.9171	-7.5242	-5.3642
1.21	-16.9865	-7.5317	-5.368
1.215	-17.0566	-7.5391	-5.3717
1.22	-17.1273	-7.5465	-5.3755
1.225	-17.1987	-7.5539	-5.3793
1.23	-17.2708	-7.5614	-5.3831
1.235	-17.3435	-7.5688	-5.3868
1.24	-17.417	-7.5762	-5.3906
1.245	-17.4911	-7.5836	-5.3943
1.25	-17.566	-7.591	-5.3981
1.255	-17.6417	-7.5984	-5.4018
1.26	-17.718	-7.6058	-5.4056
1.265	-17.7952	-7.6131	-5.4093
1.27	-17.8732	-7.6205	-5.4131
1.275	-17.9519	-7.6279	-5.4168
1.28	-18.0315	-7.6353	-5.4205
1.285	-18.112	-7.6427	-5.4243
1.29	-18.1933	-7.6501	-5.428
1.295	-18.2755	-7.6574	-5.4317
1.3	-18.3586	-7.6648	-5.4355
1.305	-18.4426	-7.6722	-5.4392
1.31	-18.5276	-7.6796	-5.4429
1.315	-18.6135	-7.6869	-5.4466
1.32	-18.7004	-7.6943	-5.4503
1.325	-18.7883	-7.7017	-5.4541
1.33	-18.8772	-7.7091	-5.4578
1.335	-18.9672	-7.7165	-5.4615
1.34	-19.0583	-7.7239	-5.4652
1.345	-19.1504	-7.7313	-5.4689
1.35	-19.2437	-7.7387	-5.4726
1.355	-19.3381	-7.746	-5.4763
1.36	-19.4337	-7.7534	-5.4801
1.365	-19.5305	-7.7608	-5.4838
1.37	-19.6285	-7.7683	-5.4875
1.375	-19.7278	-7.7757	-5.4912
1.38	-19.8283	-7.7831	-5.4949
1.385	-19.9302	-7.7905	-5.4986
1.39	-20.0334	-7.7979	-5.5023
1.395	-20.138	-7.8054	-5.506
1.4	-20.244	-7.8128	-5.5098
1.405	-20.3514	-7.8202	-5.5135
1.41	-20.4603	-7.8277	-5.5172
1.415	-20.5707	-7.8351	-5.5209
1.42	-20.6826	-7.8426	-5.5246
1.425	-20.7961	-7.8501	-5.5283
1.43	-20.9112	-7.8575	-5.532
1.435	-21.028	-7.865	-5.5358
1.44	-21.1465	-7.8725	-5.5395
1.445	-21.2667	-7.88	-5.5432
1.45	-21.3887	-7.8875	-5.5469
1.455	-21.5126	-7.895	-5.5506
1.46	-21.6383	-7.9025	-5.5544
1.465	-21.7659	-7.91	-5.5581
1.47	-21.8955	-7.9176	-5.5618
1.475	-22.0271	-7.9251	-5.5655
1.48	-22.1607	-7.9326	-5.5693
1.485	-22.2965	-7.9402	-5.573
1.49	-22.4345	-7.9478	-5.5767
1.495	-22.5747	-7.9553	-5.5805
1.5	-22.7172	-7.9629	-5.5842
1.505	-22.862	-7.9705	-5.5879
1.51	-23.0093	-7.9781	-5.5917
1.515	-23.159	-7.9857	-5.5954
1.52	-23.3113	-7.9934	-5.5992
1.525	-23.4662	-8.001	-5.6029
1.53	-23.6238	-8.0086	-5.6067
1.535	-23.7842	-8.0163	-5.6104
1.54	-23.9475	-8.024	-5.6142
1.545	-24.1136	-8.0316	-5.6179
1.55	-24.2828	-8.0393	-5.6217
1.555	-24.4551	-8.047	-5.6254
1.56	-24.6305	-8.0547	-5.6292
1.565	-24.8093	-8.0625	-5.633
1.57	-24.9914	-8.0702	-5.6367
1.575	-25.177	-8.0779	-5.6405
1.58	-25.3662	-8.0857	-5.6443
1.585	-25.5592	-8.0935	-5.6481
1.59	-25.7559	-8.1012	-5.6518
1.595	-25.9566	-8.109	-5.6556
1.6	-26.1613	-8.1168	-5.6594
1.605	-26.3703	-8.1247	-5.6632
1.61	-26.5835	-8.1325	-5.667
1.615	-26.8013	-8.1403	-5.6708
1.62	-27.0237	-8.1482	-5.6746
1.625	-27.2508	-8.1561	-5.6784
1.63	-27.4829	-8.1639	-5.6822
1.635	-27.7201	-8.1718	-5.686
1.64	-27.9626	-8.1797	-5.6898
1.645	-28.2106	-8.1877	-5.6936
1.65	-28.4642	-8.1956	-5.6974
1.655	-28.7238	-8.2036	-5.7012
1.66	-28.9894	-8.2115	-5.705
1.665	-29.2613	-8.2195	-5.7089
1.67	-29.5398	-8.2275	-5.7127
1.675	-29.8251	-8.2355	-5.7165
1.68	-30.1175	-8.2435	-5.7204
1.685	-30.4172	-8.2516	-5.7242
1.69	-30.7245	-8.2596	-5.728
1.695	-31.0398	-8.2677	-5.7319
1.7	-31.3632	-8.2758	-5.7357
1.705	-31.6953	-8.2839	-5.7396
1.71	-32.0363	-8.292	-5.7434
1.715	-32.3866	-8.3001	-5.7473
1.72	-32.7466	-8.3082	-5.7511
1.725	-33.1166	-8.3164	-5.755
1.73	-33.4972	-8.3246	-5.7589
1.735	-33.8887	-8.3328	-5.7628
1.74	-34.2917	-8.341	-5.7666
1.745	-34.7065	-8.3492	-5.7705
1.75	-35.1338	-8.3574	-5.7744
1.755	-35.5739	-8.3657	-5.7783
1.76	-36.0276	-8.374	-5.7822
1.765	-36.4952	-8.3823	-5.7861
1.77	-36.9774	-8.3906	-5.79
1.775	-37.4748	-8.3989	-5.7939
1.78	-37.9878	-8.4072	-5.7978
1.785	-38.5172	-8.4156	-5.8017
1.79	-39.0633	-8.424	-5.8056
1.795	-39.6268	-8.4324	-5.8095
1.8	-40.208	-8.4408	-5.8134
1.805	-40.8074	-8.4492	-5.8174
1.81	-41.4253	-8.4577	-5.8213
1.815	-42.0617	-8.4661	-5.8252
1.82	-42.7167	-8.4746	-5.8292
1.825	-43.39	-8.4831	-5.8331
1.83	-44.0812	-8.4916	-5.8371
1.835	-44.7893	-8.5002	-5.841
1.84	-45.5131	-8.5087	-5.845
1.845	-46.2509	-8.5173	-5.8489
1.85	-47.0004	-8.5259	-5.8529
1.855	-47.7587	-8.5345	-5.8569
1.86	-48.5223	-8.5431	-5.8608
1.865	-49.287	-8.5518	-5.8648
1.87	-50.0481	-8.5604	-5.8688
1.875	-50.8002	-8.5691	-5.8728
1.88	-51.5376	-8.5778	-5.8768
1.885	-52.2545	-8.5866	-5.8808
1.89	-52.945	-8.5953	-5.8848
1.895	-53.6039	-8.6041	-5.8888
1.9	-54.2265	-8.6129	-5.8928
1.905	-54.8092	-8.6217	-5.8968
1.91	-55.3494	-8.6305	-5.9008
1.915	-55.8458	-8.6393	-5.9048
1.92	-56.2984	-8.6482	-5.9089
1.925	-56.708	-8.6571	-5.9129
1.93	-57.0764	-8.666	-5.9169
1.935	-57.4062	-8.6749	-5.921
1.94	-57.7	-8.6839	-5.925
1.945	-57.9609	-8.6929	-5.929
1.95	-58.192	-8.7018	-5.9331
1.955	-58.3964	-8.7109	-5.9372
1.96	-58.5768	-8.7199	-5.9412
1.965	-58.7359	-8.7289	-5.9453
1.97	-58.8762	-8.738	-5.9494
1.975	-58.9997	-8.7471	-5.9534
1.98	-59.1086	-8.7562	-5.9575
1.985	-59.2045	-8.7654	-5.9616
1.99	-59.2889	-8.7746	-5.9657
1.995	-59.3633	-8.7837	-5.9698
2	-59.4288	-8.793	-5.9739
2.005	-59.4866	-8.8022	-5.978
2.01	-59.5375	-8.8114	-5.9821
2.015	-59.5824	-8.8207	-5.9862
2.02	-59.622	-8.83	-5.9903
2.025	-59.657	-8.8393	-5.9945
2.03	-59.6879	-8.8487	-5.9986
2.035	-59.7151	-8.8581	-6.0027
2.04	-59.7392	-8.8675	-6.0069
2.045	-59.7606	-8.8769	-6.011
2.05	-59.7794	-8.8863	-6.0151
2.055	-59.7961	-8.8958	-6.0193
2.06	-59.811	-8.9053	-6.0235
2.065	-59.8241	-8.9148	-6.0276
2.07	-59.8358	-8.9243	-6.0318
2.075	-59.8461	-8.9339	-6.036
2.08	-59.8553	-8.9435	-6.0401
2.085	-59.8635	-8.9531	-6.0443
2.09	-59.8708	-8.9627	-6.0485
2.095	-59.8773	-8.9724	-6.0527
2.1	-59.8831	-8.9821	-6.0569
2.105	-59.8883	-8.9918	-6.0611
2.11	-59.893	-9.0015	-6.0653
2.115	-59.8971	-9.0113	-6.0695
2.12	-59.9008	-9.021	-6.0737
2.125	-59.9042	-9.0309	-6.078
2.13	-59.9072	-9.0407	-6.0822
2.135	-59.9099	-9.0506	-6.0864
2.14	-59.9123	-9.0604	-6.0907
2.145	-59.9145	-9.0704	-6.0949
2.15	-59.9164	-9.0803	-6.0992
2.155	-59.9182	-9.0903	-6.1034
2.16	-59.9198	-9.1003	-6.1077
2.165	-59.9212	-9.1103	-6.1119
2.17	-59.9226	-9.1203	-6.1162
2.175	-59.9237	-9.1304	-6.1205
2.18	-59.9248	-9.1405	-6.1248
2.185	-59.9258	-9.1507	-6.129
2.19	-59.9267	-9.1608	-6.1333
2.195	-59.9275	-9.171	-6.1376
2.2	-59.9282	-9.1812	-6.1419
2.205	-59.9289	-9.1915	-6.1462
2.21	-59.9295	-9.2017	-6.1506
2.215	-59.9301	-9.212	-6.1549
2.22	-59.9306	-9.2224	-6.1592
2.225	-59.9311	-9.2327	-6.1635
2.23	-59.9315	-9.2431	-6.1679
2.235	-59.9319	-9.2535	-6.1722
2.24	-59.9322	-9.264	-6.1766
2.245	-59.9326	-9.2744	-6.1809
2.25	-59.9329	-9.2849	-6.1853
2.255	-59.9332	-9.2955	-6.1896
2.26	-59.9334	-9.306	-6.194
2.265	-59.9337	-9.3166	-6.1984
2.27	-59.9339	-9.3272	-6.2027
2.275	-59.9341	-9.3379	-6.2071
2.28	-59.9343	-9.3486	-6.2115
2.285	-59.9344	-9.3593	-6.2159
2.29	-59.9346	-9.37	-6.2203
2.295	-59.9347	-9.3808	-6.2247
2.3	-59.9349	-9.3916	-6.2291
2.305	-59.935	-9.4025	-6.2336
2.31	-59.9351	-9.4133	-6.238
2.315	-59.9352	-9.4242	-6.2424
2.32	-59.9353	-9.4352	-6.2469
2.325	-59.9354	-9.4461	-6.2513
2.33	-59.9355	-9.4571	-6.2557
2.335	-59.9355	-9.4682	-6.2602
2.34	-59.9356	-9.4792	-6.2647
2.345	-59.9357	-9.4903	-6.2691
2.35	-59.9357	-9.5014	-6.2736
2.355	-59.9358	-9.5126	-6.2781
2.36	-59.9358	-9.5238	-6.2826
2.365	-59.9359	-9.535	-6.287
2.37	-59.9359	-9.5463	-6.2915
2.375	-59.936	-9.5576	-6.296
2.38	-59.936	-9.5689	-6.3005
2.385	-59.9361	-9.5803	-6.3051
2.39	-59.9361	-9.5917	-6.3096
2.395	-59.9361	-9.6031	-6.3141
2.4	-59.9361	-9.6146	-6.3186
2.405	-59.9362	-9.6261	-6.3232
2.41	-59.9362	-9.6377	-6.3277
2.415	-59.9362	-9.6492	-6.3323
2.42	-59.9362	-9.6609	-6.3368
2.425	-59.9363	-9.6725	-6.3414
2.43	-59.9363	-9.6842	-6.3459
2.435	-59.9363	-9.6959	-6.3505
2.44	-59.9363	-9.7077	-6.3551
2.445	-59.9363	-9.7195	-6.3597
2.45	-59.9363	-9.7313	-6.3643
2.455	-59.9363	-9.7432	-6.3689
2.46	-59.9364	-9.7551	-6.3735
2.465	-59.9364	-9.767	-6.3781
2.47	-59.9364	-9.779	-6.3827
2.475	-59.9364	-9.791	-6.3873
2.48	-59.9364	-9.8031	-6.3919
2.485	-59.9364	-9.8152	-6.3966
2.49	-59.9364	-9.8273	-6.4012
2.495	-59.9364	-9.8395	-6.4059
2.5	-59.9364	-9.8517	-6.4105
2.505	-59.9364	-9.864	-6.4152
2.51	-59.9364	-9.8763	-6.4198
2.515	-59.9364	-9.8886	-6.4245
2.52	-59.9365	-9.901	-6.4292
2.525	-59.9365	-9.9134	-6.4339
2.53	-59.9365	-9.9259	-6.4386
2.535	-59.9365	-9.9384	-6.4433
2.54	-59.9365	-9.951	-6.448
2.545	-59.9365	-9.9635	-6.4527
2.55	-59.9365	-9.9762	-6.4574
2.555	-59.9365	-9.9888	-6.4621
2.56	-59.9365	-10.0016	-6.4669
2.565	-59.9365	-10.0143	-6.4716
2.57	-59.9365	-10.0271	-6.4763
2.575	-59.9365	-10.04	-6.4811
2.58	-59.9365	-10.0528	-6.4858
2.585	-59.9365	-10.0658	-6.4906
2.59	-59.9365	-10.0787	-6.4954
2.595	-59.9365	-10.0918	-6.5002
2.6	-59.9365	-10.1048	-6.5049
2.605	-59.9365	-10.1179	-6.5097
2.61	-59.9365	-10.1311	-6.5145
2.615	-59.9365	-10.1443	-6.5193
2.62	-59.9365	-10.1576	-6.5241
2.625	-59.9365	-10.1708	-6.529
2.63	-59.9365	-10.1842	-6.5338
2.635	-59.9365	-10.1976	-6.5386
2.64	-59.9365	-10.211	-6.5435
2.645	-59.9365	-10.2245	-6.5483
2.65	-59.9365	-10.238	-6.5531
2.655	-59.9365	-10.2516	-6.558
2.66	-59.9365	-10.2652	-6.5629
2.665	-59.9365	-10.2789	-6.5677
2.67	-59.9365	-10.2926	-6.5726
2.675	-59.9365	-10.3064	-6.5775
2.68	-59.9365	-10.3202	-6.5824
2.685	-59.9365	-10.3341	-6.5873
2.69	-59.9365	-10.348	-6.5922
2.695	-59.9365	-10.362	-6.5971
2.7	-59.9365	-10.376	-6.602
2.705	-59.9365	-10.3901	-6.607
2.71	-59.9365	-10.4042	-6.6119
2.715	-59.9365	-10.4184	-6.6168
2.72	-59.9365	-10.4327	-6.6218
2.725	-59.9365	-10.447	-6.6268
2.73	-59.9365	-10.4613	-6.6317
2.735	-59.9365	-10.4757	-6.6367
2.74	-59.9365	-10.4901	-6.6417
2.745	-59.9365	-10.5047	-6.6467
2.75	-59.9365	-10.5192	-6.6516
2.755	-59.9365	-10.5338	-6.6566
2.76	-59.9365	-10.5485	-6.6617
2.765	-59.9365	-10.5632	-6.6667
2.77	-59.9365	-10.578	-6.6717
2.775	-59.9365	-10.5929	-6.6767
2.78	-59.9365	-10.6077	-6.6818
2.785	-59.9365	-10.6227	-6.6868
2.79	-59.9365	-10.6377	-6.6919
2.795	-59.9365	-10.6528	-6.6969
2.8	-59.9365	-10.6679	-6.702
2.805	-59.9365	-10.6831	-6.7071
2.81	-59.9365	-10.6984	-6.7121
2.815	-59.9365	-10.7137	-6.7172
2.82	-59.9365	-10.729	-6.7223
2.825	-59.9365	-10.7445	-6.7274
2.83	-59.9365	-10.76	-6.7325
2.835	-59.9365	-10.7755	-6.7377
2.84	-59.9365	-10.7911	-6.7428
2.845	-59.9365	-10.8068	-6.7479
2.85	-59.9365	-10.8226	-6.7531
2.855	-59.9365	-10.8384	-6.7582
2.86	-59.9365	-10.8543	-6.7634
2.865	-59.9365	-10.8702	-6.7685
2.87	-59.9365	-10.8862	-6.7737
2.875	-59.9365	-10.9023	-6.7789
2.88	-59.9365	-10.9184	-6.7841
2.885	-59.9365	-10.9346	-6.7893
2.89	-59.9365	-10.9509	-6.7945
2.895	-59.9365	-10.9672	-6.7997
2.9	-59.9365	-10.9836	-6.8049
2.905	-59.9365	-11.0001	-6.8101
2.91	-59.9365	-11.0166	-6.8154
2.915	-59.9365	-11.0332	-6.8206
2.92	-59.9365	-11.0499	-6.8259
2.925	-59.9365	-11.0667	-6.8311
2.93	-59.9365	-11.0835	-6.8364
2.935	-59.9365	-11.1004	-6.8417
2.94	-59.9365	-11.1174	-6.847
2.945	-59.9365	-11.1344	-6.8522
2.95	-59.9365	-11.1515	-6.8575
2.955	-59.9365	-11.1687	-6.8629
2.96	-59.9365	-11.186	-6.8682
2.965	-59.9365	-11.2033	-6.8735
2.97	-59.9365	-11.2208	-6.8788
2.975	-59.9365	-11.2383	-6.8842
2.98	-59.9365	-11.2558	-6.8895
2.985	-59.9365	-11.2735	-6.8949
2.99	-59.9365	-11.2912	-6.9002
2.995	-59.9365	-11.309	-6.9056
3	-59.9365	-11.3269	-6.911
3.005	-59.9365	-11.3449	-6.9164
3.01	-59.9365	-11.3629	-6.9218
3.015	-59.9365	-11.3811	-6.9272
3.02	-59.9365	-11.3993	-6.9326
3.025	-59.9365	-11.4176	-6.938
3.03	-59.9365	-11.436	-6.9435
3.035	-59.9365	-11.4544	-6.9489
3.04	-59.9365	-11.473	-6.9544
3.045	-59.9365	-11.4916	-6.9598
3.05	-59.9365	-11.5104	-6.9653
3.055	-59.9365	-11.5292	-6.9708
3.06	-59.9365	-11.5481	-6.9763
3.065	-59.9365	-11.5671	-6.9818
3.07	-59.9365	-11.5862	-6.9873
3.075	-59.9365	-11.6053	-6.9928
3.08	-59.9365	-11.6246	-6.9983
3.085	-59.9365	-11.644	-7.0038
3.09	-59.9365	-11.6634	-7.0094
3.095	-59.9365	-11.6829	-7.0149
3.1	-59.9365	-11.7026	-7.0205
3.105	-59.9365	-11.7223	-7.026
3.11	-59.9365	-11.7421	-7.0316
3.115	-59.9365	-11.7621	-7.0372
3.12	-59.9365	-11.7821	-7.0428
3.125	-59.9365	-11.8022	-7.0484
3.13	-59.9365	-11.8224	-7.054
3.135	-59.9365	-11.8428	-7.0596
3.14	-59.9365	-11.8632	-7.0652
3.145	-59.9365	-11.8837	-7.0709
3.15	-59.9365	-11.9043	-7.0765
3.155	-59.9365	-11.9251	-7.0822
3.16	-59.9365	-11.9459	-7.0878
3.165	-59.9365	-11.9669	-7.0935
3.17	-59.9365	-11.9879	-7.0992
3.175	-59.9365	-12.0091	-7.1049
3.18	-59.9365	-12.0303	-7.1106
3.185	-59.9365	-12.0517	-7.1163
3.19	-59.9365	-12.0732	-7.122
3.195	-59.9365	-12.0948	-7.1277
3.2	-59.9365	-12.1165	-7.1335
3.205	-59.9365	-12.1384	-7.1392
3.21	-59.9365	-12.1603	-7.145
3.215	-59.9365	-12.1824	-7.1508
3.22	-59.9365	-12.2046	-7.1565
3.225	-59.9365	-12.2269	-7.1623
3.23	-59.9365	-12.2493	-7.1681
3.235	-59.9365	-12.2718	-7.1739
3.24	-59.9365	-12.2945	-7.1798
3.245	-59.9365	-12.3173	-7.1856
3.25	-59.9365	-12.3402	-7.1914
3.255	-59.9365	-12.3632	-7.1973
3.26	-59.9365	-12.3864	-7.2031
3.265	-59.9365	-12.4096	-7.209
3.27	-59.9365	-12.4331	-7.2149
3.275	-59.9365	-12.4566	-7.2207
3.28	-59.9365	-12.4803	-7.2266
3.285	-59.9365	-12.5041	-7.2325
3.29	-59.9365	-12.528	-7.2385
3.295	-59.9365	-12.5521	-7.2444
3.3	-59.9365	-12.5764	-7.2503
3.305	-59.9365	-12.6007	-7.2563
3.31	-59.9365	-12.6252	-7.2622
3.315	-59.9365	-12.6499	-7.2682
3.32	-59.9365	-12.6746	-7.2742
3.325	-59.9365	-12.6996	-7.2802
3.33	-59.9365	-12.7246	-7.2861
3.335	-59.9365	-12.7499	-7.2922
3.34	-59.9365	-12.7752	-7.2982
3.345	-59.9365	-12.8007	-7.3042
3.35	-59.9365	-12.8264	-7.3102
3.355	-59.9365	-12.8522	-7.3163
3.36	-59.9365	-12.8782	-7.3223
3.365	-59.9365	-12.9044	-7.3284
3.37	-59.9365	-12.9306	-7.3345
3.375	-59.9365	-12.9571	-7.3406
3.38	-59.9365	-12.9837	-7.3467
3.385	-59.9365	-13.0105	-7.3528
3.39	-59.9365	-13.0374	-7.3589
3.395	-59.9365	-13.0646	-7.3651
3.4	-59.9365	-13.0918	-7.3712
3.405	-59.9365	-13.1193	-7.3774
3.41	-59.9365	-13.1469	-7.3835
3.415	-59.9365	-13.1747	-7.3897
3.42	-59.9365	-13.2027	-7.3959
3.425	-59.9365	-13.2308	-7.4021
3.43	-59.9365	-13.2592	-7.4083
3.435	-59.9365	-13.2877	-7.4145
3.44	-59.9365	-13.3164	-7.4208
3.445	-59.9365	-13.3453	-7.427
3.45	-59.9365	-13.3743	-7.4333
3.455	-59.9365	-13.4036	-7.4395
3.46	-59.9365	-13.4331	-7.4458
3.465	-59.9365	-13.4627	-7.4521
3.47	-59.9365	-13.4926	-7.4584
3.475	-59.9365	-13.5226	-7.4647
3.48	-59.9365	-13.5529	-7.471
3.485	-59.9365	-13.5833	-7.4774
3.49	-59.9365	-13.614	-7.4837
3.495	-59.9365	-13.6448	-7.4901
3.5	-59.9365	-13.6759	-7.4964
3.505	-59.9365	-13.7072	-7.5028
3.51	-59.9365	-13.7387	-7.5092
3.515	-59.9365	-13.7704	-7.5156
3.52	-59.9365	-13.8024	-7.522
3.525	-59.9365	-13.8346	-7.5284
3.53	-59.9365	-13.867	-7.5349
3.535	-59.9365	-13.8996	-7.5413
3.54	-59.9365	-13.9325	-7.5478
3.545	-59.9365	-13.9656	-7.5543
3.55	-59.9365	-13.9989	-7.5608
3.555	-59.9365	-14.0325	-7.5673
3.56	-59.9365	-14.0663	-7.5738
3.565	-59.9365	-14.1003	-7.5803
3.57	-59.9365	-14.1347	-7.5868
3.575	-59.9365	-14.1692	-7.5934
3.58	-59.9365	-14.2041	-7.5999
3.585	-59.9365	-14.2391	-7.6065
3.59	-59.9365	-14.2745	-7.6131
3.595	-59.9365	-14.3101	-7.6197
3.6	-59.9365	-14.346	-7.6263
3.605	-59.9365	-14.3821	-7.6329
3.61	-59.9365	-14.4186	-7.6395
3.615	-59.9365	-14.4553	-7.6462
3.62	-59.9365	-14.4923	-7.6528
3.625	-59.9365	-14.5296	-7.6595
3.63	-59.9365	-14.5671	-7.6662
3.635	-59.9365	-14.605	-7.6729
3.64	-59.9365	-14.6432	-7.6796
3.645	-59.9365	-14.6817	-7.6863
3.65	-59.9365	-14.7204	-7.6931
3.655	-59.9365	-14.7595	-7.6998
3.66	-59.9365	-14.7989	-7.7066
3.665	-59.9365	-14.8387	-7.7133
3.67	-59.9365	-14.8787	-7.7201
3.675	-59.9365	-14.9191	-7.7269
3.68	-59.9365	-14.9598	-7.7337
3.685	-59.9365	-15.0008	-7.7406
3.69	-59.9365	-15.0422	-7.7474
3.695	-59.9365	-15.084	-7.7543
3.7	-59.9365	-15.1261	-7.7611
3.705	-59.9365	-15.1685	-7.768
3.71	-59.9365	-15.2113	-7.7749
3.715	-59.9365	-15.2545	-7.7818
3.72	-59.9365	-15.298	-7.7887
3.725	-59.9365	-15.342	-7.7957
3.73	-59.9365	-15.3863	-7.8026
3.735	-59.9365	-15.431	-7.8096
3.74	-59.9365	-15.4761	-7.8165
3.745	-59.9365	-15.5215	-7.8235
3.75	-59.9365	-15.5674	-7.8305
3.755	-59.9365	-15.6137	-7.8375
3.76	-59.9365	-15.6605	-7.8446
3.765	-59.9365	-15.7076	-7.8516
3.77	-59.9365	-15.7552	-7.8587
3.775	-59.9365	-15.8032	-7.8657
3.78	-59.9365	-15.8517	-7.8728
3.785	-59.9365	-15.9006	-7.8799
3.79	-59.9365	-15.95	-7.887
3.795	-59.9365	-15.9998	-7.8942
3.8	-59.9365	-16.0501	-7.9013
3.805	-59.9365	-16.1009	-7.9085
3.81	-59.9365	-16.1522	-7.9156
3.815	-59.9365	-16.2039	-7.9228
3.82	-59.9365	-16.2562	-7.93
3.825	-59.9365	-16.309	-7.9373
3.83	-59.9365	-16.3623	-7.9445
3.835	-59.9365	-16.4161	-7.9517
3.84	-59.9365	-16.4704	-7.959
3.845	-59.9365	-16.5253	-7.9663
3.85	-59.9365	-16.5808	-7.9736
3.855	-59.9365	-16.6368	-7.9809
3.86	-59.9365	-16.6934	-7.9882
3.865	-59.9365	-16.7505	-7.9955
3.87	-59.9365	-16.8083	-8.0029
3.875	-59.9365	-16.8666	-8.0102
3.88	-59.9365	-16.9256	-8.0176
3.885	-59.9365	-16.9852	-8.025
3.89	-59.9365	-17.0454	-8.0324
3.895	-59.9365	-17.1063	-8.0399
3.9	-59.9365	-17.1678	-8.0473
3.905	-59.9365	-17.2299	-8.0548
3.91	-59.9365	-17.2928	-8.0622
3.915	-59.9365	-17.3563	-8.0697
3.92	-59.9365	-17.4205	-8.0772
3.925	-59.9365	-17.4855	-8.0848
3.93	-59.9365	-17.5511	-8.0923
3.935	-59.9365	-17.6175	-8.0998
3.94	-59.9365	-17.6847	-8.1074
3.945	-59.9365	-17.7526	-8.115
3.95	-59.9365	-17.8213	-8.1226
3.955	-59.9365	-17.8908	-8.1302
3.96	-59.9365	-17.9611	-8.1379
3.965	-59.9365	-18.0322	-8.1455
3.97	-59.9365	-18.1041	-8.1532
3.975	-59.9365	-18.1769	-8.1609
3.98	-59.9365	-18.2506	-8.1686
3.985	-59.9365	-18.3252	-8.1763
3.99	-59.9365	-18.4006	-8.184
3.995	-59.9365	-18.477	-8.1918
4	-59.9365	-18.5543	-8.1995
4.005	-59.9365	-18.6326	-8.2073
4.01	-59.9365	-18.7118	-8.2151
4.015	-59.9365	-18.7921	-8.2229
4.02	-59.9365	-18.8733	-8.2308
4.025	-59.9365	-18.9556	-8.2386
4.03	-59.9365	-19.0389	-8.2465
4.035	-59.9365	-19.1233	-8.2544
4.04	-59.9365	-19.2088	-8.2623
4.045	-59.9365	-19.2955	-8.2702
4.05	-59.9365	-19.3832	-8.2782
4.055	-59.9365	-19.4722	-8.2861
4.06	-59.9365	-19.5623	-8.2941
4.065	-59.9365	-19.6536	-8.3021
4.07	-59.9365	-19.7462	-8.3101
4.075	-59.9365	-19.84	-8.3181
4.08	-59.9365	-19.9352	-8.3262
4.085	-59.9365	-20.0316	-8.3343
4.09	-59.9365	-20.1294	-8.3423
4.095	-59.9365	-20.2286	-8.3504
4.1	-59.9365	-20.3292	-8.3586
4.105	-59.9365	-20.4313	-8.3667
4.11	-59.9365	-20.5348	-8.3749
4.115	-59.9365	-20.6398	-8.383
4.12	-59.9365	-20.7464	-8.3912
4.125	-59.9365	-20.8545	-8.3995
4.13	-59.9365	-20.9643	-8.4077
4.135	-59.9365	-21.0757	-8.4159
4.14	-59.9365	-21.1888	-8.4242
4.145	-59.9365	-21.3036	-8.4325
4.15	-59.9365	-21.4202	-8.4408
4.155	-59.9365	-21.5386	-8.4491
4.16	-59.9365	-21.6588	-8.4575
4.165	-59.9365	-21.781	-8.4659
4.17	-59.9365	-21.9051	-8.4742
4.175	-59.9365	-22.0312	-8.4827
4.18	-59.9365	-22.1594	-8.4911
4.185	-59.9365	-22.2896	-8.4995
4.19	-59.9365	-22.422	-8.508
4.195	-59.9365	-22.5566	-8.5165
4.2	-59.9365	-22.6934	-8.525
4.205	-59.9365	-22.8326	-8.5335
4.21	-59.9365	-22.9741	-8.5421
4.215	-59.9365	-23.1181	-8.5506
4.22	-59.9365	-23.2646	-8.5592
4.225	-59.9365	-23.4137	-8.5678
4.23	-59.9365	-23.5654	-8.5765
4.235	-59.9365	-23.7198	-8.5851
4.24	-59.9365	-23.877	-8.5938
4.245	-59.9365	-24.0371	-8.6025
4.25	-59.9365	-24.2002	-8.6112
4.255	-59.9365	-24.3662	-8.6199
4.26	-59.9365	-24.5354	-8.6287
4.265	-59.9365	-24.7078	-8.6374
4.27	-59.9365	-24.8836	-8.6462
4.275	-59.9365	-25.0627	-8.6551
4.28	-59.9365	-25.2453	-8.6639
4.285	-59.9365	-25.4315	-8.6728
4.29	-59.9365	-25.6215	-8.6817
4.295	-59.9365	-25.8152	-8.6906
4.3	-59.9365	-26.013	-8.6995
4.305	-59.9365	-26.2148	-8.7084
4.31	-59.9365	-26.4208	-8.7174
4.315	-59.9365	-26.6312	-8.7264
4.32	-59.9365	-26.8461	-8.7354
4.325	-59.9365	-27.0656	-8.7445
4.33	-59.9365	-27.2899	-8.7535
4.335	-59.9365	-27.5191	-8.7626
4.34	-59.9365	-27.7535	-8.7717
4.345	-59.9365	-27.9932	-8.7809
4.35	-59.9365	-28.2384	-8.79
4.355	-59.9365	-28.4892	-8.7992
4.36	-59.9365	-28.746	-8.8084
4.365	-59.9365	-29.0088	-8.8176
4.37	-59.9365	-29.278	-8.8269
4.375	-59.9365	-29.5537	-8.8361
4.38	-59.9365	-29.8362	-8.8454
4.385	-59.9365	-30.1258	-8.8547
4.39	-59.9365	-30.4228	-8.8641
4.395	-59.9365	-30.7273	-8.8735
4.4	-59.9365	-31.0398	-8.8828
4.405	-59.9365	-31.3606	-8.8923
4.41	-59.9365	-31.6899	-8.9017
4.415	-59.9365	-32.0282	-8.9112
4.42	-59.9365	-32.3757	-8.9207
4.425	-59.9365	-32.7329	-8.9302
4.43	-59.9365	-33.1002	-8.9397
4.435	-59.9365	-33.478	-8.9493
4.44	-59.9365	-33.8668	-8.9589
4.445	-59.9365	-34.2669	-8.9685
4.45	-59.9365	-34.679	-8.9781
4.455	-59.9365	-35.1034	-8.9878
4.46	-59.9365	-35.5408	-8.9975
4.465	-59.9365	-35.9916	-9.0072
4.47	-59.9365	-36.4564	-9.0169
4.475	-59.9365	-36.9358	-9.0267
4.48	-59.9365	-37.4302	-9.0365
4.485	-59.9365	-37.9404	-9.0463
4.49	-59.9365	-38.4669	-9.0562
4.495	-59.9365	-39.0102	-9.0661
4.5	-59.9365	-39.5707	-9.076
4.505	-59.9365	-40.1491	-9.0859
4.51	-59.9365	-40.7456	-9.0958
4.515	-59.9365	-41.3607	-9.1058
4.52	-59.9365	-41.9943	-9.1158
4.525	-59.9365	-42.6466	-9.1259
4.53	-59.9365	-43.3174	-9.1359
4.535	-59.9365	-44.0061	-9.146
4.54	-59.9365	-44.7119	-9.1562
4.545	-59.9365	-45.4337	-9.1663
4.55	-59.9365	-46.1697	-9.1765
4.555	-59.9365	-46.9178	-9.1867
4.56	-59.9365	-47.6751	-9.1969
4.565	-59.9365	-48.4383	-9.2072
4.57	-59.9365	-49.2031	-9.2175
4.575	-59.9365	-49.9648	-9.2278
4.58	-59.9365	-50.7182	-9.2381
4.585	-59.9365	-51.4576	-9.2485
4.59	-59.9365	-52.1772	-9.2589
4.595	-59.9365	-52.871	-9.2694
4.6	-59.9365	-53.5338	-9.2798
4.605	-59.9365	-54.1608	-9.2903
4.61	-59.9365	-54.7481	-9.3009
4.615	-59.9365	-55.2932	-9.3114
4.62	-59.9365	-55.7946	-9.322
4.625	-59.9365	-56.2521	-9.3326
4.63	-59.9365	-56.6664	-9.3433
4.635	-59.9365	-57.0393	-9.354
4.64	-59.9365	-57.3731	-9.3647
4.645	-59.9365	-57.6707	-9.3754
4.65	-59.9365	-57.9351	-9.3862
4.655	-59.9365	-58.1693	-9.397
4.66	-59.9365	-58.3764	-9.4078
4.665	-59.9365	-58.5593	-9.4187
4.67	-59.9365	-58.7205	-9.4296
4.675	-59.9365	-58.8627	-9.4406
4.68	-59.9365	-58.9879	-9.4515
4.685	-59.9365	-59.0982	-9.4625
4.69	-59.9365	-59.1954	-9.4735
4.695	-59.9365	-59.2809	-9.4846
4.7	-59.9365	-59.3563	-9.4957
4.705	-59.9365	-59.4227	-9.5068
4.71	-59.9365	-59.4812	-9.518
4.715	-59.9365	-59.5328	-9.5292
4.72	-59.9365	-59.5783	-9.5404
4.725	-59.9365	-59.6184	-9.5517
4.73	-59.9365	-59.6538	-9.563
4.735	-59.9365	-59.685	-9.5744
4.74	-59.9365	-59.7126	-9.5857
4.745	-59.9365	-59.7371	-9.5971
4.75	-59.9365	-59.7586	-9.6086
4.755	-59.9365	-59.7777	-9.62
4.76	-59.9365	-59.7947	-9.6316
4.765	-59.9365	-59.8096	-9.6431
4.77	-59.9365	-59.8229	-9.6547
4.775	-59.9365	-59.8347	-9.6663
4.78	-59.9365	-59.8452	-9.678
4.785	-59.9365	-59.8545	-9.6897
4.79	-59.9365	-59.8628	-9.7014
4.795	-59.9365	-59.8702	-9.7132
4.8	-59.9365	-59.8768	-9.725
4.805	-59.9365	-59.8826	-9.7368
4.81	-59.9365	-59.8879	-9.7487
4.815	-59.9365	-59.8926	-9.7606
4.82	-59.9365	-59.8968	-9.7726
4.825	-59.9365	-59.9005	-9.7845
4.83	-59.9365	-59.9039	-9.7966
4.835	-59.9365	-59.9069	-9.8087
4.84	-59.9365	-59.9096	-9.8208
4.845	-59.9365	-59.9121	-9.8329
4.85	-59.9365	-59.9143	-9.8451
4.855	-59.9365	-59.9163	-9.8573
4.86	-59.9365	-59.918	-9.8696
4.865	-59.9365	-59.9197	-9.8819
4.87	-59.9365	-59.9211	-9.8943
4.875	-59.9365	-59.9225	-9.9067
4.88	-59.9365	-59.9237	-9.9191
4.885	-59.9365	-59.9247	-9.9316
4.89	-59.9365	-59.9257	-9.9441
4.895	-59.9365	-59.9266	-9.9566
4.9	-59.9365	-59.9274	-9.9692
4.905	-59.9365	-59.9282	-9.9819
4.91	-59.9365	-59.9289	-9.9945
4.915	-59.9365	-59.9295	-10.0073
4.92	-59.9365	-59.93	-10.02
4.925	-59.9365	-59.9306	-10.0329
4.93	-59.9365	-59.931	-10.0457
4.935	-59.9365	-59.9315	-10.0586
4.94	-59.9365	-59.9319	-10.0716
4.945	-59.9365	-59.9322	-10.0846
4.95	-59.9365	-59.9326	-10.0976
4.955	-59.9365	-59.9329	-10.1107
4.96	-59.9365	-59.9331	-10.1238
4.965	-59.9365	-59.9334	-10.137
4.97	-59.9365	-59.9336	-10.1502
4.975	-59.9365	-59.9339	-10.1634
4.98	-59.9365	-59.9341	-10.1767
4.985	-59.9365	-59.9342	-10.1901
4.99	-59.9365	-59.9344	-10.2035
4.995	-59.9365	-59.9346	-10.217
5	-59.9365	-59.9347	-10.2305
5.005	-59.9365	-59.9348	-10.244
5.01	-59.9365	-59.935	-10.2576
5.015	-59.9365	-59.9351	-10.2712
5.02	-59.9365	-59.9352	-10.2849
5.025	-59.9365	-59.9353	-10.2987
5.03	-59.9365	-59.9354	-10.3125
5.035	-59.9365	-59.9355	-10.3263
5.04	-59.9365	-59.9355	-10.3402
5.045	-59.9365	-59.9356	-10.3541
5.05	-59.9365	-59.9357	-10.3681
5.055	-59.9365	-59.9357	-10.3822
5.06	-59.9365	-59.9358	-10.3963
5.065	-59.9365	-59.9358	-10.4104
5.07	-59.9365	-59.9359	-10.4246
5.075	-59.9365	-59.9359	-10.4389
5.08	-59.9365	-59.936	-10.4532
5.085	-59.9365	-59.936	-10.4676
5.09	-59.9365	-59.936	-10.482
5.095	-59.9365	-59.9361	-10.4965
5.1	-59.9365	-59.9361	-10.511
5.105	-59.9365	-59.9361	-10.5256
5.11	-59.9365	-59.9362	-10.5402
5.115	-59.9365	-59.9362	-10.5549
5.12	-59.9365	-59.9362	-10.5696
5.125	-59.9365	-59.9362	-10.5844
5.13	-59.9365	-59.9363	-10.5993
5.135	-59.9365	-59.9363	-10.6142
5.14	-59.9365	-59.9363	-10.6292
5.145	-59.9365	-59.9363	-10.6442
5.15	-59.9365	-59.9363	-10.6593
5.155	-59.9365	-59.9363	-10.6745
5.16	-59.9365	-59.9363	-10.6897
5.165	-59.9365	-59.9364	-10.705
5.17	-59.9365	-59.9364	-10.7203
5.175	-59.9365	-59.9364	-10.7357
5.18	-59.9365	-59.9364	-10.7512
5.185	-59.9365	-59.9364	-10.7667
5.19	-59.9365	-59.9364	-10.7823
5.195	-59.9365	-59.9364	-10.7979
5.2	-59.9365	-59.9364	-10.8136
5.205	-59.9365	-59.9364	-10.8294
5.21	-59.9365	-59.9364	-10.8452
5.215	-59.9365	-59.9364	-10.8611
5.22	-59.9365	-59.9364	-10.8771
5.225	-59.9365	-59.9365	-10.8931
5.23	-59.9365	-59.9365	-10.9092
5.235	-59.9365	-59.9365	-10.9253
5.24	-59.9365	-59.9365	-10.9416
5.245	-59.9365	-59.9365	-10.9579
5.25	-59.9365	-59.9365	-10.9742
5.255	-59.9365	-59.9365	-10.9907
5.26	-59.9365	-59.9365	-11.0072
5.265	-59.9365	-59.9365	-11.0237
5.27	-59.9365	-59.9365	-11.0404
5.275	-59.9365	-59.9365	-11.0571
5.28	-59.9365	-59.9365	-11.0739
5.285	-59.9365	-59.9365	-11.0907
5.29	-59.9365	-59.9365	-11.1077
5.295	-59.9365	-59.9365	-11.1247
5.3	-59.9365	-59.9365	-11.1417
5.305	-59.9365	-59.9365	-11.1589
5.31	-59.9365	-59.9365	-11.1761
5.315	-59.9365	-59.9365	-11.1934
5.32	-59.9365	-59.9365	-11.2108
5.325	-59.9365	-59.9365	-11.2282
5.33	-59.9365	-59.9365	-11.2458
5.335	-59.9365	-59.9365	-11.2634
5.34	-59.9365	-59.9365	-11.2811
5.345	-59.9365	-59.9365	-11.2988
5.35	-59.9365	-59.9365	-11.3167
5.355	-59.9365	-59.9365	-11.3346
5.36	-59.9365	-59.9365	-11.3526
5.365	-59.9365	-59.9365	-11.3707
5.37	-59.9365	-59.9365	-11.3888
5.375	-59.9365	-59.9365	-11.4071
5.38	-59.9365	-59.9365	-11.4254
5.385	-59.9365	-59.9365	-11.4438
5.39	-59.9365	-59.9365	-11.4623
5.395	-59.9365	-59.9365	-11.4809
5.4	-59.9365	-59.9365	-11.4996
5.405	-59.9365	-59.9365	-11.5184
5.41	-59.9365	-59.9365	-11.5372
5.415	-59.9365	-59.9365	-11.5562
5.42	-59.9365	-59.9365	-11.5752
5.425	-59.9365	-59.9365	-11.5943
5.43	-59.9365	-59.9365	-11.6135
5.435	-59.9365	-59.9365	-11.6328
5.44	-59.9365	-59.9365	-11.6522
5.445	-59.9365	-59.9365	-11.6717
5.45	-59.9365	-59.9365	-11.6913
5.455	-59.9365	-59.9365	-11.711
5.46	-59.9365	-59.9365	-11.7307
5.465	-59.9365	-59.9365	-11.7506
5.47	-59.9365	-59.9365	-11.7706
5.475	-59.9365	-59.9365	-11.7906
5.48	-59.9365	-59.9365	-11.8108
5.485	-59.9365	-59.9365	-11.8311
5.49	-59.9365	-59.9365	-11.8514
5.495	-59.9365	-59.9365	-11.8719
5.5	-59.9365	-59.9365	-11.8925
5.505	-59.9365	-59.9365	-11.9131
5.51	-59.9365	-59.9365	-11.9339
5.515	-59.9365	-59.9365	-11.9548
5.52	-59.9365	-59.9365	-11.9758
5.525	-59.9365	-59.9365	-11.9969
5.53	-59.9365	-59.9365	-12.0181
5.535	-59.9365	-59.9365	-12.0394
5.54	-59.9365	-59.9365	-12.0608
5.545	-59.9365	-59.9365	-12.0824
5.55	-59.9365	-59.9365	-12.104
5.555	-59.9365	-59.9365	-12.1258
5.56	-59.9365	-59.9365	-12.1477
5.565	-59.9365	-59.9365	-12.1697
5.57	-59.9365	-59.9365	-12.1918
5.575	-59.9365	-59.9365	-12.214
5.58	-59.9365	-59.9365	-12.2363
5.585	-59.9365	-59.9365	-12.2588
5.59	-59.9365	-59.9365	-12.2814
5.595	-59.9365	-59.9365	-12.3041
5.6	-59.9365	-59.9365	-12.3269
5.605	-59.9365	-59.9365	-12.3499
5.61	-59.9365	-59.9365	-12.373
5.615	-59.9365	-59.9365	-12.3962
5.62	-59.9365	-59.9365	-12.4195
5.625	-59.9365	-59.9365	-12.443
5.63	-59.9365	-59.9365	-12.4666
5.635	-59.9365	-59.9365	-12.4904
5.64	-59.9365	-59.9365	-12.5142
5.645	-59.9365	-59.9365	-12.5382
5.65	-59.9365	-59.9365	-12.5624
5.655	-59.9365	-59.9365	-12.5867
5.66	-59.9365	-59.9365	-12.6111
5.665	-59.9365	-59.9365	-12.6356
5.67	-59.9365	-59.9365	-12.6603
5.675	-59.9365	-59.9365	-12.6852
5.68	-59.9365	-59.9365	-12.7102
5.685	-59.9365	-59.9365	-12.7353
5.69	-59.9365	-59.9365	-12.7606
5.695	-59.9365	-59.9365	-12.786
5.7	-59.9365	-59.9365	-12.8116
5.705	-59.9365	-59.9365	-12.8373
5.71	-59.9365	-59.9365	-12.8632
5.715	-59.9365	-59.9365	-12.8893
5.72	-59.9365	-59.9365	-12.9155
5.725	-59.9365	-59.9365	-12.9418
5.73	-59.9365	-59.9365	-12.9683
5.735	-59.9365	-59.9365	-12.995
5.74	-59.9365	-59.9365	-13.0219
5.745	-59.9365	-59.9365	-13.0489
5.75	-59.9365	-59.9365	-13.0761
5.755	-59.9365	-59.9365	-13.1034
5.76	-59.9365	-59.9365	-13.1309
5.765	-59.9365	-59.9365	-13.1586
5.77	-59.9365	-59.9365	-13.1865
5.775	-59.9365	-59.9365	-13.2146
5.78	-59.9365	-59.9365	-13.2428
5.785	-59.9365	-59.9365	-13.2712
5.79	-59.9365	-59.9365	-13.2998
5.795	-59.9365	-59.9365	-13.3286
5.8	-59.9365	-59.9365	-13.3575
5.805	-59.9365	-59.9365	-13.3867
5.81	-59.9365	-59.9365	-13.416
5.815	-59.9365	-59.9365	-13.4456
5.82	-59.9365	-59.9365	-13.4753
5.825	-59.9365	-59.9365	-13.5052
5.83	-59.9365	-59.9365	-13.5354
5.835	-59.9365	-59.9365	-13.5657
5.84	-59.9365	-59.9365	-13.5962
5.845	-59.9365	-59.9365	-13.627
5.85	-59.9365	-59.9365	-13.6579
5.855	-59.9365	-59.9365	-13.6891
5.86	-59.9365	-59.9365	-13.7205
5.865	-59.9365	-59.9365	-13.7521
5.87	-59.9365	-59.9365	-13.7839
5.875	-59.9365	-59.9365	-13.816
5.88	-59.9365	-59.9365	-13.8482
5.885	-59.9365	-59.9365	-13.8807
5.89	-59.9365	-59.9365	-13.9135
5.895	-59.9365	-59.9365	-13.9464
5.9	-59.9365	-59.9365	-13.9796
5.905	-59.9365	-59.9365	-14.013
5.91	-59.9365	-59.9365	-14.0467
5.915	-59.9365	-59.9365	-14.0806
5.92	-59.9365	-59.9365	-14.1148
5.925	-59.9365	-59.9365	-14.1492
5.93	-59.9365	-59.9365	-14.1839
5.935	-59.9365	-59.9365	-14.2188
5.94	-59.9365	-59.9365	-14.254
5.945	-59.9365	-59.9365	-14.2895
5.95	-59.9365	-59.9365	-14.3252
5.955	-59.9365	-59.9365	-14.3612
5.96	-59.9365	-59.9365	-14.3975
5.965	-59.9365	-59.9365	-14.4341
5.97	-59.9365	-59.9365	-14.4709
5.975	-59.9365	-59.9365	-14.508
5.98	-59.9365	-59.9365	-14.5454
5.985	-59.9365	-59.9365	-14.5831
5.99	-59.9365	-59.9365	-14.6211
5.995	-59.9365	-59.9365	-14.6594
6	-59.9365	-59.9365	-14.698
6.005	-59.9365	-59.9365	-14.7369
6.01	-59.9365	-59.9365	-14.7761
6.015	-59.9365	-59.9365	-14.8157
6.02	-59.9365	-59.9365	-14.8555
6.025	-59.9365	-59.9365	-14.8957
6.03	-59.9365	-59.9365	-14.9362
6.035	-59.9365	-59.9365	-14.9771
6.04	-59.9365	-59.9365	-15.0183
6.045	-59.9365	-59.9365	-15.0598
6.05	-59.9365	-59.9365	-15.1017
6.055	-59.9365	-59.9365	-15.1439
6.06	-59.9365	-59.9365	-15.1865
6.065	-59.9365	-59.9365	-15.2295
6.07	-59.9365	-59.9365	-15.2728
6.075	-59.9365	-59.9365	-15.3165
6.08	-59.9365	-59.9365	-15.3606
6.085	-59.9365	-59.9365	-15.4051
6.09	-59.9365	-59.9365	-15.45
6.095	-59.9365	-59.9365	-15.4952
6.1	-59.9365	-59.9365	-15.5409
6.105	-59.9365	-59.9365	-15.5869
6.11	-59.9365	-59.9365	-15.6334
6.115	-59.9365	-59.9365	-15.6803
6.12	-59.9365	-59.9365	-15.7277
6.125	-59.9365	-59.9365	-15.7754
6.13	-59.9365	-59.9365	-15.8236
6.135	-59.9365	-59.9365	-15.8723
6.14	-59.9365	-59.9365	-15.9214
6.145	-59.9365	-59.9365	-15.9709
6.15	-59.9365	-59.9365	-16.021
6.155	-59.9365	-59.9365	-16.0715
6.16	-59.9365	-59.9365	-16.1225
6.165	-59.9365	-59.9365	-16.174
6.17	-59.9365	-59.9365	-16.2259
6.175	-59.9365	-59.9365	-16.2784
6.18	-59.9365	-59.9365	-16.3314
6.185	-59.9365	-59.9365	-16.3849
6.19	-59.9365	-59.9365	-16.439
6.195	-59.9365	-59.9365	-16.4935
6.2	-59.9365	-59.9365	-16.5487
6.205	-59.9365	-59.9365	-16.6044
6.21	-59.9365	-59.9365	-16.6606
6.215	-59.9365	-59.9365	-16.7174
6.22	-59.9365	-59.9365	-16.7749
6.225	-59.9365	-59.9365	-16.8329
6.23	-59.9365	-59.9365	-16.8915
6.235	-59.9365	-59.9365	-16.9507
6.24	-59.9365	-59.9365	-17.0105
6.245	-59.9365	-59.9365	-17.071
6.25	-59.9365	-59.9365	-17.1321
6.255	-59.9365	-59.9365	-17.1939
6.26	-59.9365	-59.9365	-17.2564
6.265	-59.9365	-59.9365	-17.3195
6.27	-59.9365	-59.9365	-17.3833
6.275	-59.9365	-59.9365	-17.4479
6.28	-59.9365	-59.9365	-17.5131
6.285	-59.9365	-59.9365	-17.5791
6.29	-59.9365	-59.9365	-17.6458
6.295	-59.9365	-59.9365	-17.7133
6.3	-59.9365	-59.9365	-17.7815
6.305	-59.9365	-59.9365	-17.8505
6.31	-59.9365	-59.9365	-17.9204
6.315	-59.9365	-59.9365	-17.991
6.32	-59.9365	-59.9365	-18.0625
6.325	-59.9365	-59.9365	-18.1348
6.33	-59.9365	-59.9365	-18.2079
6.335	-59.9365	-59.9365	-18.282
6.34	-59.9365	-59.9365	-18.3569
6.345	-59.9365	-59.9365	-18.4327
6.35	-59.9365	-59.9365	-18.5095
6.355	-59.9365	-59.9365	-18.5872
6.36	-59.9365	-59.9365	-18.6659
6.365	-59.9365	-59.9365	-18.7456
6.37	-59.9365	-59.9365	-18.8262
6.375	-59.9365	-59.9365	-18.9079
6.38	-59.9365	-59.9365	-18.9906
6.385	-59.9365	-59.9365	-19.0744
6.39	-59.9365	-59.9365	-19.1593
6.395	-59.9365	-59.9365	-19.2453
6.4	-59.9365	-59.9365	-19.3324
6.405	-59.9365	-59.9365	-19.4206
6.41	-59.9365	-59.9365	-19.51
6.415	-59.9365	-59.9365	-19.6007
6.42	-59.9365	-59.9365	-19.6925
6.425	-59.9365	-59.9365	-19.7856
6.43	-59.9365	-59.9365	-19.88
6.435	-59.9365	-59.9365	-19.9757
6.44	-59.9365	-59.9365	-20.0727
6.445	-59.9365	-59.9365	-20.1711
6.45	-59.9365	-59.9365	-20.2709
6.455	-59.9365	-59.9365	-20.3721
6.46	-59.9365	-59.9365	-20.4748
6.465	-59.9365	-59.9365	-20.5789
6.47	-59.9365	-59.9365	-20.6846
6.475	-59.9365	-59.9365	-20.7918
6.48	-59.9365	-59.9365	-20.9006
6.485	-59.9365	-59.9365	-21.0111
6.49	-59.9365	-59.9365	-21.1232
6.495	-59.9365	-59.9365	-21.237
6.5	-59.9365	-59.9365	-21.3526
6.505	-59.9365	-59.9365	-21.4699
6.51	-59.9365	-59.9365	-21.5891
6.515	-59.9365	-59.9365	-21.7102
6.52	-59.9365	-59.9365	-21.8331
6.525	-59.9365	-59.9365	-21.9581
6.53	-59.9365	-59.9365	-22.085
6.535	-59.9365	-59.9365	-22.2141
6.54	-59.9365	-59.9365	-22.3452
6.545	-59.9365	-59.9365	-22.4785
6.55	-59.9365	-59.9365	-22.6141
6.555	-59.9365	-59.9365	-22.7519
6.56	-59.9365	-59.9365	-22.892
6.565	-59.9365	-59.9365	-23.0346
6.57	-59.9365	-59.9365	-23.1796
6.575	-59.9365	-59.9365	-23.3272
6.58	-59.9365	-59.9365	-23.4774
6.585	-59.9365	-59.9365	-23.6302
6.59	-59.9365	-59.9365	-23.7858
6.595	-59.9365	-59.9365	-23.9443
6.6	-59.9365	-59.9365	-24.1056
6.605	-59.9365	-59.9365	-24.2699
6.61	-59.9365	-59.9365	-24.4373
6.615	-59.9365	-59.9365	-24.6078
6.62	-59.9365	-59.9365	-24.7816
6.625	-59.9365	-59.9365	-24.9587
6.63	-59.9365	-59.9365	-25.1393
6.635	-59.9365	-59.9365	-25.3234
6.64	-59.9365	-59.9365	-25.5112
6.645	-59.9365	-59.9365	-25.7028
6.65	-59.9365	-59.9365	-25.8982
6.655	-59.9365	-59.9365	-26.0977
6.66	-59.9365	-59.9365	-26.3012
6.665	-59.9365	-59.9365	-26.5091
6.67	-59.9365	-59.9365	-26.7213
6.675	-59.9365	-59.9365	-26.9382
6.68	-59.9365	-59.9365	-27.1597
6.685	-59.9365	-59.9365	-27.386
6.69	-59.9365	-59.9365	-27.6174
6.695	-59.9365	-59.9365	-27.854
6.7	-59.9365	-59.9365	-28.096
6.705	-59.9365	-59.9365	-28.3435
6.71	-59.9365	-59.9365	-28.5968
6.715	-59.9365	-59.9365	-28.8561
6.72	-59.9365	-59.9365	-29.1216
6.725	-59.9365	-59.9365	-29.3935
6.73	-59.9365	-59.9365	-29.6721
6.735	-59.9365	-59.9365	-29.9576
6.74	-59.9365	-59.9365	-30.2502
6.745	-59.9365	-59.9365	-30.5504
6.75	-59.9365	-59.9365	-30.8583
6.755	-59.9365	-59.9365	-31.1742
6.76	-59.9365	-59.9365	-31.4985
6.765	-59.9365	-59.9365	-31.8316
6.77	-59.9365	-59.9365	-32.1737
6.775	-59.9365	-59.9365	-32.5253
6.78	-59.9365	-59.9365	-32.8867
6.785	-59.9365	-59.9365	-33.2584
6.79	-59.9365	-59.9365	-33.6408
6.795	-59.9365	-59.9365	-34.0343
6.8	-59.9365	-59.9365	-34.4394
6.805	-59.9365	-59.9365	-34.8566
6.81	-59.9365	-59.9365	-35.2864
6.815	-59.9365	-59.9365	-35.7294
6.82	-59.9365	-59.9365	-36.186
6.825	-59.9365	-59.9365	-36.6569
6.83	-59.9365	-59.9365	-37.1426
6.835	-59.9365	-59.9365	-37.6436
6.84	-59.9365	-59.9365	-38.1606
6.845	-59.9365	-59.9365	-38.6941
6.85	-59.9365	-59.9365	-39.2446
6.855	-59.9365	-59.9365	-39.8126
6.86	-59.9365	-59.9365	-40.3986
6.865	-59.9365	-59.9365	-41.0029
6.87	-59.9365	-59.9365	-41.6258
6.875	-59.9365	-59.9365	-42.2674
6.88	-59.9365	-59.9365	-42.9275
6.885	-59.9365	-59.9365	-43.6059
6.89	-59.9365	-59.9365	-44.302
6.895	-59.9365	-59.9365	-45.0147
6.9	-59.9365	-59.9365	-45.7427
6.905	-59.9365	-59.9365	-46.4841
6.91	-59.9365	-59.9365	-47.2365
6.915	-59.9365	-59.9365	-47.9967
6.92	-59.9365	-59.9365	-48.7611
6.925	-59.9365	-59.9365	-49.5252
6.93	-59.9365	-59.9365	-50.2841
6.935	-59.9365	-59.9365	-51.0324
6.94	-59.9365	-59.9365	-51.7641
6.945	-59.9365	-59.9365	-52.4735
6.95	-59.9365	-59.9365	-53.1549
6.955	-59.9365	-59.9365	-53.803
6.96	-59.9365	-59.9365	-54.4137
6.965	-59.9365	-59.9365	-54.9835
6.97	-59.9365	-59.9365	-55.5102
6.975	-59.9365	-59.9365	-55.993
6.98	-59.9365	-59.9365	-56.4321
6.985	-59.9365	-59.9365	-56.8287
6.99	-59.9365	-59.9365	-57.1848
6.995	-59.9365	-59.9365	-57.503
7	-59.9365	-59.9365	-57.7862
7.005	-59.9365	-59.9365	-58.0375
7.01	-59.9365	-59.9365	-58.2599
7.015	-59.9365	-59.9365	-58.4564
7.02	-59.9365	-59.9365	-58.6298
7.025	-59.9365	-59.9365	-58.7827
7.03	-59.9365	-59.9365	-58.9175
7.035	-59.9365	-59.9365	-59.0362
7.04	-59.9365	-59.9365	-59.1407
7.045	-59.9365	-59.9365	-59.2328
7.05	-59.9365	-59.9365	-59.3139
7.055	-59.9365	-59.9365	-59.3853
7.06	-59.9365	-59.9365	-59.4483
7.065	-59.9365	-59.9365	-59.5038
7.07	-59.9365	-59.9365	-59.5527
7.075	-59.9365	-59.9365	-59.5958
7.08	-59.9365	-59.9365	-59.6339
7.085	-59.9365	-59.9365	-59.6674
7.09	-59.9365	-59.9365	-59.6971
7.095	-59.9365	-59.9365	-59.7233
7.1	-59.9365	-59.9365	-59.7465
7.105	-59.9365	-59.9365	-59.767
7.11	-59.9365	-59.9365	-59.7851
7.115	-59.9365	-59.9365	-59.8012
7.12	-59.9365	-59.9365	-59.8154
7.125	-59.9365	-59.9365	-59.8281
7.13	-59.9365	-59.9365	-59.8393
7.135	-59.9365	-59.9365	-59.8493
7.14	-59.9365	-59.9365	-59.8581
7.145	-59.9365	-59.9365	-59.866
7.15	-59.9365	-59.9365	-59.8731
7.155	-59.9365	-59.9365	-59.8793
7.16	-59.9365	-59.9365	-59.8849
7.165	-59.9365	-59.9365	-59.8899
7.17	-59.9365	-59.9365	-59.8944
7.175	-59.9365	-59.9365	-59.8984
7.18	-59.9365	-59.9365	-59.902
7.185	-59.9365	-59.9365	-59.9052
7.19	-59.9365	-59.9365	-59.9081
7.195	-59.9365	-59.9365	-59.9107
7.2	-59.9365	-59.9365	-59.913
7.205	-59.9365	-59.9365	-59.9151
7.21	-59.9365	-59.9365	-59.917
7.215	-59.9365	-59.9365	-59.9188
7.22	-59.9365	-59.9365	-59.9203
7.225	-59.9365	-59.9365	-59.9217
7.23	-59.9365	-59.9365	-59.923
7.235	-59.9365	-59.9365	-59.9241
7.24	-59.9365	-59.9365	-59.9252
7.245	-59.9365	-59.9365	-59.9261
7.25	-59.9365	-59.9365	-59.927
7.255	-59.9365	-59.9365	-59.9278
7.26	-59.9365	-59.9365	-59.9285
7.265	-59.9365	-59.9365	-59.9291
7.27	-59.9365	-59.9365	-59.9297
7.275	-59.9365	-59.9365	-59.9303
7.28	-59.9365	-59.9365	-59.9308
7.285	-59.9365	-59.9365	-59.9312
7.29	-59.9365	-59.9365	-59.9316
7.295	-59.9365	-59.9365	-59.932
7.3	-59.9365	-59.9365	-59.9324
7.305	-59.9365	-59.9365	-59.9327
7.31	-59.9365	-59.9365	-59.933
7.315	-59.9365	-59.9365	-59.9333
7.32	-59.9365	-59.9365	-59.9335
7.325	-59.9365	-59.9365	-59.9337
7.33	-59.9365	-59.9365	-59.9339
7.335	-59.9365	-59.9365	-59.9341
7.34	-59.9365	-59.9365	-59.9343
7.345	-59.9365	-59.9365	-59.9345
7.35	-59.9365	-59.9365	-59.9346
7.355	-59.9365	-59.9365	-59.9348
7.36	-59.9365	-59.9365	-59.9349
7.365	-59.9365	-59.9365	-59.935
7.37	-59.9365	-59.9365	-59.9351
7.375	-59.9365	-59.9365	-59.9352
7.38	-59.9365	-59.9365	-59.9353
7.385	-59.9365	-59.9365	-59.9354
7.39	-59.9365	-59.9365	-59.9355
7.395	-59.9365	-59.9365	-59.9356
7.4	-59.9365	-59.9365	-59.9356
7.405	-59.9365	-59.9365	-59.9357
7.41	-59.9365	-59.9365	-59.9358
7.415	-59.9365	-59.9365	-59.9358
7.42	-59.9365	-59.9365	-59.9359
7.425	-59.9365	-59.9365	-59.9359
7.43	-59.9365	-59.9365	-59.9359
7.435	-59.9365	-59.9365	-59.936
7.44	-59.9365	-59.9365	-59.936
7.445	-59.9365	-59.9365	-59.9361
7.45	-59.9365	-59.9365	-59.9361
7.455	-59.9365	-59.9365	-59.9361
7.46	-59.9365	-59.9365	-59.9362
7.465	-59.9365	-59.9365	-59.9362
7.47	-59.9365	-59.9365	-59.9362
7.475	-59.9365	-59.9365	-59.9362
7.48	-59.9365	-59.9365	-59.9362
7.485	-59.9365	-59.9365	-59.9363
7.49	-59.9365	-59.9365	-59.9363
7.495	-59.9365	-59.9365	-59.9363
7.5	-59.9365	-59.9365	-59.9363
7.505	-59.9365	-59.9365	-59.9363
7.51	-59.9365	-59.9365	-59.9363
7.515	-59.9365	-59.9365	-59.9364
7.52	-59.9365	-59.9365	-59.9364
7.525	-59.9365	-59.9365	-59.9364
7.53	-59.9365	-59.9365	-59.9364
7.535	-59.9365	-59.9365	-59.9364
7.54	-59.9365	-59.9365	-59.9364
7.545	-59.9365	-59.9365	-59.9364
7.55	-59.9365	-59.9365	-59.9364
7.555	-59.9365	-59.9365	-59.9364
7.56	-59.9365	-59.9365	-59.9364
7.565	-59.9365	-59.9365	-59.9364
7.57	-59.9365	-59.9365	-59.9364
7.575	-59.9365	-59.9365	-59.9364
7.58	-59.9365	-59.9365	-59.9365
7.585	-59.9365	-59.9365	-59.9365
7.59	-59.9365	-59.9365	-59.9365
7.595	-59.9365	-59.9365	-59.9365
7.6	-59.9365	-59.9365	-59.9365
7.605	-59.9365	-59.9365	-59.9365
7.61	-59.9365	-59.9365	-59.9365
7.615	-59.9365	-59.9365	-59.9365
7.62	-59.9365	-59.9365	-59.9365
7.625	-59.9365	-59.9365	-59.9365
7.63	-59.9365	-59.9365	-59.9365
7.635	-59.9365	-59.9365	-59.9365
7.64	-59.9365	-59.9365	-59.9365
7.645	-59.9365	-59.9365	-59.9365
7.65	-59.9365	-59.9365	-59.9365
7.655	-59.9365	-59.9365	-59.9365
7.66	-59.9365	-59.9365	-59.9365
7.665	-59.9365	-59.9365	-59.9365
7.67	-59.9365	-59.9365	-59.9365
7.675	-59.9365	-59.9365	-59.9365
7.68	-59.9365	-59.9365	-59.9365
7.685	-59.9365	-59.9365	-59.9365
7.69	-59.9365	-59.9365	-59.9365
7.695	-59.9365	-59.9365	-59.9365
7.7	-59.9365	-59.9365	-59.9365
7.705	-59.9365	-59.9365	-59.9365
7.71	-59.9365	-59.9365	-59.9365
7.715	-59.9365	-59.9365	-59.9365
7.72	-59.9365	-59.9365	-59.9365
7.725	-59.9365	-59.9365	-59.9365
7.73	-59.9365	-59.9365	-59.9365
7.735	-59.9365	-59.9365	-59.9365
7.74	-59.9365	-59.9365	-59.9365
7.745	-59.9365	-59.9365	-59.9365
7.75	-59.9365	-59.9365	-59.9365
7.755	-59.9365	-59.9365	-59.9365
7.76	-59.9365	-59.9365	-59.9365
7.765	-59.9365	-59.9365	-59.9365
7.77	-59.9365	-59.9365	-59.9365
7.775	-59.9365	-59.9365	-59.9365
7.78	-59.9365	-59.9365	-59.9365
7.785	-59.9365	-59.9365	-59.9365
7.79	-59.9365	-59.9365	-59.9365
7.795	-59.9365	-59.9365	-59.9365
7.8	-59.9365	-59.9365	-59.9365
7.805	-59.9365	-59.9365	-59.9365
7.81	-59.9365	-59.9365	-59.9365
7.815	-59.9365	-59.9365	-59.9365
7.82	-59.9365	-59.9365	-59.9365
7.825	-59.9365	-59.9365	-59.9365
7.83	-59.9365	-59.9365	-59.9365
7.835	-59.9365	-59.9365	-59.9365
7.84	-59.9365	-59.9365	-59.9365
7.845	-59.9365	-59.9365	-59.9365
7.85	-59.9365	-59.9365	-59.9365
7.855	-59.9365	-59.9365	-59.9365
7.86	-59.9365	-59.9365	-59.9365
7.865	-59.9365	-59.9365	-59.9365
7.87	-59.9365	-59.9365	-59.9365
7.875	-59.9365	-59.9365	-59.9365
7.88	-59.9365	-59.9365	-59.9365
7.885	-59.9365	-59.9365	-59.9365
7.89	-59.9365	-59.9365	-59.9365
7.895	-59.9365	-59.9365	-59.9365
7.9	-59.9365	-59.9365	-59.9365
7.905	-59.9365	-59.9365	-59.9365
7.91	-59.9365	-59.9365	-59.9365
7.915	-59.9365	-59.9365	-59.9365
7.92	-59.9365	-59.9365	-59.9365
7.925	-59.9365	-59.9365	-59.9365
7.93	-59.9365	-59.9365	-59.9365
7.935	-59.9365	-59.9365	-59.9365
7.94	-59.9365	-59.9365	-59.9365
7.945	-59.9365	-59.9365	-59.9365
7.95	-59.9365	-59.9365	-59.9365
7.955	-59.9365	-59.9365	-59.9365
7.96	-59.9365	-59.9365	-59.9365
7.965	-59.9365	-59.9365	-59.9365
7.97	-59.9365	-59.9365	-59.9365
7.975	-59.9365	-59.9365	-59.9365
7.98	-59.9365	-59.9365	-59.9365
7.985	-59.9365	-59.9365	-59.9365
7.99	-59.9365	-59.9365	-59.9365
7.995	-59.9365	-59.9365	-59.9365
8	-59.9365	-59.9365	-59.9365
8.005	-59.9365	-59.9365	-59.9365
8.01	-59.9365	-59.9365	-59.9365
8.015	-59.9365	-59.9365	-59.9365
8.02	-59.9365	-59.9365	-59.9365
8.025	-59.9365	-59.9365	-59.9365
8.03	-59.9365	-59.9365	-59.9365
8.035	-59.9365	-59.9365	-59.9365
8.04	-59.9365	-59.9365	-59.9365
8.045	-59.9365	-59.9365	-59.9365
8.05	-59.9365	-59.9365	-59.9365
8.055	-59.9365	-59.9365	-59.9365
8.06	-59.9365	-59.9365	-59.9365
8.065	-59.9365	-59.9365	-59.9365
8.07	-59.9365	-59.9365	-59.9365
8.075	-59.9365	-59.9365	-59.9365
8.08	-59.9365	-59.9365	-59.9365
8.085	-59.9365	-59.9365	-59.9365
8.09	-59.9365	-59.9365	-59.9365
8.095	-59.9365	-59.9365	-59.9365
8.1	-59.9365	-59.9365	-59.9365
8.105	-59.9365	-59.9365	-59.9365
8.11	-59.9365	-59.9365	-59.9365
8.115	-59.9365	-59.9365	-59.9365
8.12	-59.9365	-59.9365	-59.9365
8.125	-59.9365	-59.9365	-59.9365
8.13	-59.9365	-59.9365	-59.9365
8.135	-59.9365	-59.9365	-59.9365
8.14	-59.9365	-59.9365	-59.9365
8.145	-59.9365	-59.9365	-59.9365
8.15	-59.9365	-59.9365	-59.9365
8.155	-59.9365	-59.9365	-59.9365
8.16	-59.9365	-59.9365	-59.9365
8.165	-59.9365	-59.9365	-59.9365
8.17	-59.9365	-59.9365	-59.9365
8.175	-59.9365	-59.9365	-59.9365
8.18	-59.9365	-59.9365	-59.9365
8.185	-59.9365	-59.9365	-59.9365
8.19	-59.9365	-59.9365	-59.9365
8.195	-59.9365	-59.9365	-59.9365
8.2	-59.9365	-59.9365	-59.9365
8.205	-59.9365	-59.9365	-59.9365
8.21	-59.9365	-59.9365	-59.9365
8.215	-59.9365	-59.9365	-59.9365
8.22	-59.9365	-59.9365	-59.9365
8.225	-59.9365	-59.9365	-59.9365
8.23	-59.9365	-59.9365	-59.9365
8.235	-59.9365	-59.9365	-59.9365
8.24	-59.9365	-59.9365	-59.9365
8.245	-59.9365	-59.9365	-59.9365
8.25	-59.9365	-59.9365	-59.9365
8.255	-59.9365	-59.9365	-59.9365
8.26	-59.9365	-59.9365	-59.9365
8.265	-59.9365	-59.9365	-59.9365
8.27	-59.9365	-59.9365	-59.9365
8.275	-59.9365	-59.9365	-59.9365
8.28	-59.9365	-59.9365	-59.9365
8.285	-59.9365	-59.9365	-59.9365
8.29	-59.9365	-59.9365	-59.9365
8.295	-59.9365	-59.9365	-59.9365
8.3	-59.9365	-59.9365	-59.9365
8.305	-59.9365	-59.9365	-59.9365
8.31	-59.9365	-59.9365	-59.9365
8.315	-59.9365	-59.9365	-59.9365
8.32	-59.9365	-59.9365	-59.9365
8.325	-59.9365	-59.9365	-59.9365
8.33	-59.9365	-59.9365	-59.9365
8.335	-59.9365	-59.9365	-59.9365
8.34	-59.9365	-59.9365	-59.9365
8.345	-59.9365	-59.9365	-59.9365
8.35	-59.9365	-59.9365	-59.9365
8.355	-59.9365	-59.9365	-59.9365
8.36	-59.9365	-59.9365	-59.9365
8.365	-59.9365	-59.9365	-59.9365
8.37	-59.9365	-59.9365	-59.9365
8.375	-59.9365	-59.9365	-59.9365
8.38	-59.9365	-59.9365	-59.9365
8.385	-59.9365	-59.9365	-59.9365
8.39	-59.9365	-59.9365	-59.9365
8.395	-59.9365	-59.9365	-59.9365
8.4	-59.9365	-59.9365	-59.9365
8.405	-59.9365	-59.9365	-59.9365
8.41	-59.9365	-59.9365	-59.9365
8.415	-59.9365	-59.9365	-59.9365
8.42	-59.9365	-59.9365	-59.9365
8.425	-59.9365	-59.9365	-59.9365
8.43	-59.9365	-59.9365	-59.9365
8.435	-59.9365	-59.9365	-59.9365
8.44	-59.9365	-59.9365	-59.9365
8.445	-59.9365	-59.9365	-59.9365
8.45	-59.9365	-59.9365	-59.9365
8.455	-59.9365	-59.9365	-59.9365
8.46	-59.9365	-59.9365	-59.9365
8.465	-59.9365	-59.9365	-59.9365
8.47	-59.9365	-59.9365	-59.9365
8.475	-59.9365	-59.9365	-59.9365
8.48	-59.9365	-59.9365	-59.9365
8.485	-59.9365	-59.9365	-59.9365
8.49	-59.9365	-59.9365	-59.9365
8.495	-59.9365	-59.9365	-59.9365
8.5	-59.9365	-59.9365	-59.9365
8.505	-59.9365	-59.9365	-59.9365
8.51	-59.9365	-59.9365	-59.9365
8.515	-59.9365	-59.9365	-59.9365
8.52	-59.9365	-59.9365	-59.9365
8.525	-59.9365	-59.9365	-59.9365
8.53	-59.9365	-59.9365	-59.9365
8.535	-59.9365	-59.9365	-59.9365
8.54	-59.9365	-59.9365	-59.9365
8.545	-59.9365	-59.9365	-59.9365
8.55	-59.9365	-59.9365	-59.9365
8.555	-59.9365	-59.9365	-59.9365
8.56	-59.9365	-59.9365	-59.9365
8.565	-59.9365	-59.9365	-59.9365
8.57	-59.9365	-59.9365	-59.9365
8.575	-59.9365	-59.9365	-59.9365
8.58	-59.9365	-59.9365	-59.9365
8.585	-59.9365	-59.9365	-59.9365
8.59	-59.9365	-59.9365	-59.9365
8.595	-59.9365	-59.9365	-59.9365
8.6	-59.9365	-59.9365	-59.9365
8.605	-59.9365	-59.9365	-59.9365
8.61	-59.9365	-59.9365	-59.9365
8.615	-59.9365	-59.9365	-59.9365
8.62	-59.9365	-59.9365	-59.9365
8.625	-59.9365	-59.9365	-59.9365
8.63	-59.9365	-59.9365	-59.9365
8.635	-59.9365	-59.9365	-59.9365
8.64	-59.9365	-59.9365	-59.9365
8.645	-59.9365	-59.9365	-59.9365
8.65	-59.9365	-59.9365	-59.9365
8.655	-59.9365	-59.9365	-59.9365
8.66	-59.9365	-59.9365	-59.9365
8.665	-59.9365	-59.9365	-59.9365
8.67	-59.9365	-59.9365	-59.9365
8.675	-59.9365	-59.9365	-59.9365
8.68	-59.9365	-59.9365	-59.9365
8.685	-59.9365	-59.9365	-59.9365
8.69	-59.9365	-59.9365	-59.9365
8.695	-59.9365	-59.9365	-59.9365
8.7	-59.9365	-59.9365	-59.9365
8.705	-59.9365	-59.9365	-59.9365
8.71	-59.9365	-59.9365	-59.9365
8.715	-59.9365	-59.9365	-59.9365
8.72	-59.9365	-59.9365	-59.9365
8.725	-59.9365	-59.9365	-59.9365
8.73	-59.9365	-59.9365	-59.9365
8.735	-59.9365	-59.9365	-59.9365
8.74	-59.9365	-59.9365	-59.9365
8.745	-59.9365	-59.9365	-59.9365
8.75	-59.9365	-59.9365	-59.9365
8.755	-59.9365	-59.9365	-59.9365
8.76	-59.9365	-59.9365	-59.9365
8.765	-59.9365	-59.9365	-59.9365
8.77	-59.9365	-59.9365	-59.9365
8.775	-59.9365	-59.9365	-59.9365
8.78	-59.9365	-59.9365	-59.9365
8.785	-59.9365	-59.9365	-59.9365
8.79	-59.9365	-59.9365	-59.9365
8.795	-59.9365	-59.9365	-59.9365
8.8	-59.9365	-59.9365	-59.9365
8.805	-59.9365	-59.9365	-59.9365
8.81	-59.9365	-59.9365	-59.9365
8.815	-59.9365	-59.9365	-59.9365
8.82	-59.9365	-59.9365	-59.9365
8.825	-59.9365	-59.9365	-59.9365
8.83	-59.9365	-59.9365	-59.9365
8.835	-59.9365	-59.9365	-59.9365
8.84	-59.9365	-59.9365	-59.9365
8.845	-59.9365	-59.9365	-59.9365
8.85	-59.9365	-59.9365	-59.9365
8.855	-59.9365	-59.9365	-59.9365
8.86	-59.9365	-59.9365	-59.9365
8.865	-59.9365	-59.9365	-59.9365
8.87	-59.9365	-59.9365	-59.9365
8.875	-59.9365	-59.9365	-59.9365
8.88	-59.9365	-59.9365	-59.9365
8.885	-59.9365	-59.9365	-59.9365
8.89	-59.9365	-59.9365	-59.9365
8.895	-59.9365	-59.9365	-59.9365
8.9	-59.9365	-59.9365	-59.9365
8.905	-59.9365	-59.9365	-59.9365
8.91	-59.9365	-59.9365	-59.9365
8.915	-59.9365	-59.9365	-59.9365
8.92	-59.9365	-59.9365	-59.9365
8.925	-59.9365	-59.9365	-59.9365
8.93	-59.9365	-59.9365	-59.9365
8.935	-59.9365	-59.9365	-59.9365
8.94	-59.9365	-59.9365	-59.9365
8.945	-59.9365	-59.9365	-59.9365
8.95	-59.9365	-59.9365	-59.9365
8.955	-59.9365	-59.9365	-59.9365
8.96	-59.9365	-59.9365	-59.9365
8.965	-59.9365	-59.9365	-59.9365
8.97	-59.9365	-59.9365	-59.9365
8.975	-59.9365	-59.9365	-59.9365
8.98	-59.9365	-59.9365	-59.9365
8.985	-59.9365	-59.9365	-59.9365
8.99	-59.9365	-59.9365	-59.9365
8.995	-59.9365	-59.9365	-59.9365
9	-59.9365	-59.9365	-59.9365
9.005	-59.9365	-59.9365	-59.9365
9.01	-59.9365	-59.9365	-59.9365
9.015	-59.9365	-59.9365	-59.9365
9.02	-59.9365	-59.9365	-59.9365
9.025	-59.9365	-59.9365	-59.9365
9.03	-59.9365	-59.9365	-59.9365
9.035	-59.9365	-59.9365	-59.9365
9.04	-59.9365	-59.9365	-59.9365
9.045	-59.9365	-59.9365	-59.9365
9.05	-59.9365	-59.9365	-59.9365
9.055	-59.9365	-59.9365	-59.9365
9.06	-59.9365	-59.9365	-59.9365
9.065	-59.9365	-59.9365	-59.9365
9.07	-59.9365	-59.9365	-59.9365
9.075	-59.9365	-59.9365	-59.9365
9.08	-59.9365	-59.9365	-59.9365
9.085	-59.9365	-59.9365	-59.9365
9.09	-59.9365	-59.9365	-59.9365
9.095	-59.9365	-59.9365	-59.9365
9.1	-59.9365	-59.9365	-59.9365
9.105	-59.9365	-59.9365	-59.9365
9.11	-59.9365	-59.9365	-59.9365
9.115	-59.9365	-59.9365	-59.9365
9.12	-59.9365	-59.9365	-59.9365
9.125	-59.9365	-59.9365	-59.9365
9.13	-59.9365	-59.9365	-59.9365
9.135	-59.9365	-59.9365	-59.9365
9.14	-59.9365	-59.9365	-59.9365
9.145	-59.9365	-59.9365	-59.9365
9.15	-59.9365	-59.9365	-59.9365
9.155	-59.9365	-59.9365	-59.9365
9.16	-59.9365	-59.9365	-59.9365
9.165	-59.9365	-59.9365	-59.9365
9.17	-59.9365	-59.9365	-59.9365
9.175	-59.9365	-59.9365	-59.9365
9.18	-59.9365	-59.9365	-59.9365
9.185	-59.9365	-59.9365	-59.9365
9.19	-59.9365	-59.9365	-59.9365
9.195	-59.9365	-59.9365	-59.9365
9.2	-59.9365	-59.9365	-59.9365
9.205	-59.9365	-59.9365	-59.9365
9.21	-59.9365	-59.9365	-59.9365
9.215	-59.9365	-59.9365	-59.9365
9.22	-59.9365	-59.9365	-59.9365
9.225	-59.9365	-59.9365	-59.9365
9.23	-59.9365	-59.9365	-59.9365
9.235	-59.9365	-59.9365	-59.9365
9.24	-59.9365	-59.9365	-59.9365
9.245	-59.9365	-59.9365	-59.9365
9.25	-59.9365	-59.9365	-59.9365
9.255	-59.9365	-59.9365	-59.9365
9.26	-59.9365	-59.9365	-59.9365
9.265	-59.9365	-59.9365	-59.9365
9.27	-59.9365	-59.9365	-59.9365
9.275	-59.9365	-59.9365	-59.9365
9.28	-59.9365	-59.9365	-59.9365
9.285	-59.9365	-59.9365	-59.9365
9.29	-59.9365	-59.9365	-59.9365
9.295	-59.9365	-59.9365	-59.9365
9.3	-59.9365	-59.9365	-59.9365
9.305	-59.9365	-59.9365	-59.9365
9.31	-59.9365	-59.9365	-59.9365
9.315	-59.9365	-59.9365	-59.9365
9.32	-59.9365	-59.9365	-59.9365
9.325	-59.9365	-59.9365	-59.9365
9.33	-59.9365	-59.9365	-59.9365
9.335	-59.9365	-59.9365	-59.9365
9.34	-59.9365	-59.9365	-59.9365
9.345	-59.9365	-59.9365	-59.9365
9.35	-59.9365	-59.9365	-59.9365
9.355	-59.9365	-59.9365	-59.9365
9.36	-59.9365	-59.9365	-59.9365
9.365	-59.9365	-59.9365	-59.9365
9.37	-59.9365	-59.9365	-59.9365
9.375	-59.9365	-59.9365	-59.9365
9.38	-59.9365	-59.9365	-59.9365
9.385	-59.9365	-59.9365	-59.9365
9.39	-59.9365	-59.9365	-59.9365
9.395	-59.9365	-59.9365	-59.9365
9.4	-59.9365	-59.9365	-59.9365
9.405	-59.9365	-59.9365	-59.9365
9.41	-59.9365	-59.9365	-59.9365
9.415	-59.9365	-59.9365	-59.9365
9.42	-59.9365	-59.9365	-59.9365
9.425	-59.9365	-59.9365	-59.9365
9.43	-59.9365	-59.9365	-59.9365
9.435	-59.9365	-59.9365	-59.9365
9.44	-59.9365	-59.9365	-59.9365
9.445	-59.9365	-59.9365	-59.9365
9.45	-59.9365	-59.9365	-59.9365
9.455	-59.9365	-59.9365	-59.9365
9.46	-59.9365	-59.9365	-59.9365
9.465	-59.9365	-59.9365	-59.9365
9.47	-59.9365	-59.9365	-59.9365
9.475	-59.9365	-59.9365	-59.9365
9.48	-59.9365	-59.9365	-59.9365
9.485	-59.9365	-59.9365	-59.9365
9.49	-59.9365	-59.9365	-59.9365
9.495	-59.9365	-59.9365	-59.9365
9.5	-59.9365	-59.9365	-59.9365
9.505	-59.9365	-59.9365	-59.9365
9.51	-59.9365	-59.9365	-59.9365
9.515	-59.9365	-59.9365	-59.9365
9.52	-59.9365	-59.9365	-59.9365
9.525	-59.9365	-59.9365	-59.9365
9.53	-59.9365	-59.9365	-59.9365
9.535	-59.9365	-59.9365	-59.9365
9.54	-59.9365	-59.9365	-59.9365
9.545	-59.9365	-59.9365	-59.9365
9.55	-59.9365	-59.9365	-59.9365
9.555	-59.9365	-59.9365	-59.9365
9.56	-59.9365	-59.9365	-59.9365
9.565	-59.9365	-59.9365	-59.9365
9.57	-59.9365	-59.9365	-59.9365
9.575	-59.9365	-59.9365	-59.9365
9.58	-59.9365	-59.9365	-59.9365
9.585	-59.9365	-59.9365	-59.9365
9.59	-59.9365	-59.9365	-59.9365
9.595	-59.9365	-59.9365	-59.9365
9.6	-59.9365	-59.9365	-59.9365
9.605	-59.9365	-59.9365	-59.9365
9.61	-59.9365	-59.9365	-59.9365
9.615	-59.9365	-59.9365	-59.9365
9.62	-59.9365	-59.9365	-59.9365
9.625	-59.9365	-59.9365	-59.9365
9.63	-59.9365	-59.9365	-59.9365
9.635	-59.9365	-59.9365	-59.9365
9.64	-59.9365	-59.9365	-59.9365
9.645	-59.9365	-59.9365	-59.9365
9.65	-59.9365	-59.9365	-59.9365
9.655	-59.9365	-59.9365	-59.9365
9.66	-59.9365	-59.9365	-59.9365
9.665	-59.9365	-59.9365	-59.9365
9.67	-59.9365	-59.9365	-59.9365
9.675	-59.9365	-59.9365	-59.9365
9.68	-59.9365	-59.9365	-59.9365
9.685	-59.9365	-59.9365	-59.9365
9.69	-59.9365	-59.9365	-59.9365
9.695	-59.9365	-59.9365	-59.9365
9.7	-59.9365	-59.9365	-59.9365
9.705	-59.9365	-59.9365	-59.9365
9.71	-59.9365	-59.9365	-59.9365
9.715	-59.9365	-59.9365	-59.9365
9.72	-59.9365	-59.9365	-59.9365
9.725	-59.9365	-59.9365	-59.9365
9.73	-59.9365	-59.9365	-59.9365
9.735	-59.9365	-59.9365	-59.9365
9.74	-59.9365	-59.9365	-59.9365
9.745	-59.9365	-59.9365	-59.9365
9.75	-59.9365	-59.9365	-59.9365
9.755	-59.9365	-59.9365	-59.9365
9.76	-59.9365	-59.9365	-59.9365
9.765	-59.9365	-59.9365	-59.9365
9.77	-59.9365	-59.9365	-59.9365
9.775	-59.9365	-59.9365	-59.9365
9.78	-59.9365	-59.9365	-59.9365
9.785	-59.9365	-59.9365	-59.9365
9.79	-59.9365	-59.9365	-59.9365
9.795	-59.9365	-59.9365	-59.9365
9.8	-59.9365	-59.9365	-59.9365
9.805	-59.9365	-59.9365	-59.9365
9.81	-59.9365	-59.9365	-59.9365
9.815	-59.9365	-59.9365	-59.9365
9.82	-59.9365	-59.9365	-59.9365
9.825	-59.9365	-59.9365	-59.9365
9.83	-59.9365	-59.9365	-59.9365
9.835	-59.9365	-59.9365	-59.9365
9.84	-59.9365	-59.9365	-59.9365
9.845	-59.9365	-59.9365	-59.9365
9.85	-59.9365	-59.9365	-59.9365
9.855	-59.9365	-59.9365	-59.9365
9.86	-59.9365	-59.9365	-59.9365
9.865	-59.9365	-59.9365	-59.9365
9.87	-59.9365	-59.9365	-59.9365
9.875	-59.9365	-59.9365	-59.9365
9.88	-59.9365	-59.9365	-59.9365
9.885	-59.9365	-59.9365	-59.9365
9.89	-59.9365	-59.9365	-59.9365
9.895	-59.9365	-59.9365	-59.9365
9.9	-59.9365	-59.9365	-59.9365
9.905	-59.9365	-59.9365	-59.9365
9.91	-59.9365	-59.9365	-59.9365
9.915	-59.9365	-59.9365	-59.9365
9.92	-59.9365	-59.9365	-59.9365
9.925	-59.9365	-59.9365	-59.9365
9.93	-59.9365	-59.9365	-59.9365
9.935	-59.9365	-59.9365	-59.9365
[truncated: 13 more rows]

## Sheet: Data_Fig13D
	Voltage [mV]
time [s]	300 pA	600 pA	900 pA
-1.99	-60	-60	-60
-1.94	-60	-60	-60
-1.89	-60	-60	-60
-1.84	-60	-60	-60
-1.79	-60	-60	-60
-1.74	-60	-60	-60
-1.69	-60	-60	-60
-1.64	-60	-60	-60
-1.59	-60	-60	-60
-1.54	-60	-60	-60
0	-60	-60	-60
0.005	11.1399	84.6457	159.067
0.01	78.9681	226.395	115.959
0.015	146.367	82.1468	38.6254
0.02	202.969	41.4989	38.907
0.025	116.776	40.4448	39.1804
0.03	50.1071	40.0858	39.4249
0.035	37.8026	39.7782	39.6425
0.04	35.5309	39.506	39.8351
0.045	34.7689	39.2636	40.0048
0.05	34.2694	39.0466	40.1531
0.055	33.8546	38.8511	40.2817
0.06	33.4935	38.674	40.3923
0.065	33.1754	38.5125	40.4863
0.07	32.8934	38.3645	40.5649
0.075	32.6419	38.2279	40.6296
0.08	32.4165	38.1011	40.6814
0.085	32.2133	37.9826	40.7215
0.09	32.0294	37.8714	40.7508
0.095	31.8619	37.7663	40.7702
0.1	31.7087	37.6664	40.7807
0.105	0.9618	-1.1268	-1.1646
0.11	-2.6919	-1.817	-1.3231
0.115	-3.2837	-1.9803	-1.4384
0.12	-3.5947	-2.145	-1.5597
0.125	-3.8861	-2.3178	-1.6869
0.13	-4.1873	-2.4986	-1.8198
0.135	-4.5022	-2.6871	-1.958
0.14	-4.8312	-2.8829	-2.1011
0.145	-5.1739	-3.0854	-2.2486
0.15	-5.5301	-3.2942	-2.4001
0.155	-5.8991	-3.5086	-2.5549
0.16	-6.2803	-3.7279	-2.7125
0.165	-6.673	-3.9513	-2.8722
0.17	-7.0761	-4.1781	-3.0334
0.175	-7.4888	-4.4075	-3.1954
0.18	-7.91	-4.6385	-3.3574
0.185	-8.3385	-4.8704	-3.5189
0.19	-8.773	-5.1024	-3.6792
0.195	-9.2124	-5.3334	-3.8378
0.2	-9.6552	-5.5628	-3.994
0.205	-10.1001	-5.7899	-4.1473
0.21	-10.5456	-6.0137	-4.2973
0.215	-10.9904	-6.2338	-4.4435
0.22	-11.4331	-6.4494	-4.5856
0.225	-11.8723	-6.66	-4.7233
0.23	-12.3067	-6.8652	-4.8564
0.235	-12.735	-7.0646	-4.9846
0.24	-13.1563	-7.2577	-5.1079
0.245	-13.5693	-7.4444	-5.2262
0.25	-13.9731	-7.6245	-5.3394
0.255	-14.367	-7.7978	-5.4476
0.26	-14.7501	-7.9642	-5.5508
0.265	-15.122	-8.1238	-5.6492
0.27	-15.4822	-8.2766	-5.7427
0.275	-15.8303	-8.4226	-5.8315
0.28	-16.1662	-8.562	-5.9159
0.285	-16.4898	-8.695	-5.9959
0.29	-16.801	-8.8217	-6.0717
0.295	-17.1002	-8.9423	-6.1435
0.3	-17.3873	-9.057	-6.2116
0.305	-17.6629	-9.1662	-6.276
0.31	-17.9271	-9.27	-6.337
0.315	-18.1804	-9.3686	-6.3948
0.32	-18.4234	-9.4624	-6.4495
0.325	-18.6564	-9.5515	-6.5013
0.33	-18.88	-9.6363	-6.5504
0.335	-19.0948	-9.717	-6.5969
0.34	-19.3013	-9.7938	-6.6411
0.345	-19.5	-9.8669	-6.683
0.35	-19.6915	-9.9365	-6.7228
0.355	-19.8763	-10.003	-6.7607
0.36	-20.0549	-10.0664	-6.7967
0.365	-20.2278	-10.127	-6.831
0.37	-20.3956	-10.185	-6.8637
0.375	-20.5586	-10.2405	-6.8949
0.38	-20.7174	-10.2937	-6.9247
0.385	-20.8723	-10.3447	-6.9532
0.39	-21.0237	-10.3937	-6.9805
0.395	-21.1721	-10.4408	-7.0066
0.4	-21.3177	-10.4862	-7.0317
0.405	-21.4609	-10.53	-7.0558
0.41	-21.602	-10.5722	-7.079
0.415	-21.7413	-10.613	-7.1013
0.42	-21.879	-10.6525	-7.1227
0.425	-22.0155	-10.6908	-7.1435
0.43	-22.1509	-10.7279	-7.1635
0.435	-22.2856	-10.764	-7.1829
0.44	-22.4196	-10.7991	-7.2016
0.445	-22.5531	-10.8332	-7.2198
0.45	-22.6865	-10.8665	-7.2374
0.455	-22.8198	-10.899	-7.2546
0.46	-22.9533	-10.9308	-7.2712
0.465	-23.087	-10.9618	-7.2874
0.47	-23.2211	-10.9922	-7.3032
0.475	-23.3557	-11.022	-7.3186
0.48	-23.4911	-11.0512	-7.3337
0.485	-23.6273	-11.0799	-7.3484
0.49	-23.7644	-11.1082	-7.3627
0.495	-23.9027	-11.1359	-7.3768
0.5	-24.042	-11.1633	-7.3906
0.505	-24.1827	-11.1902	-7.4041
0.51	-24.3248	-11.2168	-7.4174
0.515	-24.4684	-11.243	-7.4305
0.52	-24.6137	-11.2689	-7.4433
0.525	-24.7607	-11.2946	-7.4559
0.53	-24.9095	-11.3199	-7.4683
0.535	-25.0602	-11.345	-7.4805
0.54	-25.213	-11.3699	-7.4926
0.545	-25.368	-11.3945	-7.5045
0.55	-25.5252	-11.4189	-7.5162
0.555	-25.6847	-11.4432	-7.5278
0.56	-25.8468	-11.4673	-7.5393
0.565	-26.0115	-11.4912	-7.5506
0.57	-26.1788	-11.5149	-7.5618
0.575	-26.349	-11.5385	-7.5729
0.58	-26.5221	-11.562	-7.5839
0.585	-26.6983	-11.5854	-7.5948
0.59	-26.8777	-11.6087	-7.6056
0.595	-27.0604	-11.6319	-7.6163
0.6	-27.2466	-11.6549	-7.6269
0.605	-27.4364	-11.6779	-7.6374
0.61	-27.63	-11.7009	-7.6479
0.615	-27.8275	-11.7238	-7.6582
0.62	-28.029	-11.7466	-7.6686
0.625	-28.2348	-11.7693	-7.6788
0.63	-28.445	-11.792	-7.689
0.635	-28.6598	-11.8147	-7.6991
0.64	-28.8794	-11.8374	-7.7092
0.645	-29.104	-11.86	-7.7193
0.65	-29.3338	-11.8826	-7.7292
0.655	-29.569	-11.9052	-7.7392
0.66	-29.8099	-11.9277	-7.7491
0.665	-30.0567	-11.9503	-7.759
0.67	-30.3096	-11.9728	-7.7688
0.675	-30.569	-11.9954	-7.7786
0.68	-30.8351	-12.0179	-7.7883
0.685	-31.1083	-12.0405	-7.7981
0.69	-31.3888	-12.0631	-7.8078
0.695	-31.677	-12.0857	-7.8174
0.7	-31.9732	-12.1083	-7.8271
0.705	-32.2779	-12.1309	-7.8367
0.71	-32.5914	-12.1535	-7.8463
0.715	-32.9141	-12.1762	-7.8559
0.72	-33.2466	-12.1989	-7.8655
0.725	-33.5892	-12.2217	-7.875
0.73	-33.9425	-12.2444	-7.8846
0.735	-34.307	-12.2673	-7.8941
0.74	-34.6833	-12.2901	-7.9036
0.745	-35.0719	-12.313	-7.9131
0.75	-35.4734	-12.3359	-7.9226
0.755	-35.8886	-12.3589	-7.9321
0.76	-36.3181	-12.382	-7.9415
0.765	-36.7625	-12.4051	-7.951
0.77	-37.2228	-12.4282	-7.9605
0.775	-37.6994	-12.4514	-7.9699
0.78	-38.1934	-12.4746	-7.9794
0.785	-38.7054	-12.4979	-7.9888
0.79	-39.2363	-12.5213	-7.9982
0.795	-39.7868	-12.5448	-8.0077
0.8	-40.3577	-12.5683	-8.0171
0.805	-40.9497	-12.5918	-8.0266
0.81	-41.5633	-12.6155	-8.036
0.815	-42.1992	-12.6392	-8.0454
0.82	-42.8575	-12.6629	-8.0549
0.825	-43.5384	-12.6868	-8.0643
0.83	-44.2417	-12.7107	-8.0738
0.835	-44.9668	-12.7347	-8.0832
0.84	-45.7127	-12.7588	-8.0927
0.845	-46.4775	-12.7829	-8.1021
0.85	-47.2591	-12.8071	-8.1116
0.855	-48.0543	-12.8315	-8.121
0.86	-48.8589	-12.8559	-8.1305
0.865	-49.6681	-12.8803	-8.14
0.87	-50.4759	-12.9049	-8.1495
0.875	-51.2756	-12.9296	-8.159
0.88	-52.0598	-12.9543	-8.1685
0.885	-52.8209	-12.9791	-8.178
0.89	-53.5513	-13.0041	-8.1875
0.895	-54.2441	-13.0291	-8.197
0.9	-54.8932	-13.0542	-8.2066
0.905	-55.4942	-13.0794	-8.2161
0.91	-56.0442	-13.1047	-8.2257
0.915	-56.542	-13.1301	-8.2352
0.92	-56.9882	-13.1556	-8.2448
0.925	-57.3846	-13.1812	-8.2544
0.93	-57.7343	-13.2069	-8.264
0.935	-58.0408	-13.2327	-8.2736
0.94	-58.3082	-13.2586	-8.2833
0.945	-58.5406	-13.2846	-8.2929
0.95	-58.7419	-13.3108	-8.3026
0.955	-58.916	-13.337	-8.3122
0.96	-59.0664	-13.3634	-8.3219
0.965	-59.196	-13.3898	-8.3316
0.97	-59.3077	-13.4164	-8.3413
0.975	-59.4039	-13.4431	-8.351
0.98	-59.4867	-13.4699	-8.3608
0.985	-59.5579	-13.4968	-8.3705
0.99	-59.6193	-13.5238	-8.3803
0.995	-59.6721	-13.5509	-8.3901
1	-59.7175	-13.5782	-8.3999
1.005	-59.7565	-13.6056	-8.4097
1.01	-59.7901	-13.6331	-8.4195
1.015	-59.8191	-13.6608	-8.4293
1.02	-59.8439	-13.6885	-8.4392
1.025	-59.8654	-13.7164	-8.4491
1.03	-59.8838	-13.7444	-8.459
1.035	-59.8996	-13.7726	-8.4689
1.04	-59.9133	-13.8009	-8.4788
1.045	-59.925	-13.8293	-8.4888
1.05	-59.9351	-13.8578	-8.4987
1.055	-59.9438	-13.8865	-8.5087
1.06	-59.9513	-13.9153	-8.5187
1.065	-59.9577	-13.9443	-8.5287
1.07	-59.9632	-13.9734	-8.5388
1.075	-59.968	-14.0026	-8.5488
1.08	-59.9721	-14.032	-8.5589
1.085	-59.9756	-14.0615	-8.569
1.09	-59.9787	-14.0912	-8.5791
1.095	-59.9813	-14.121	-8.5893
1.1	-59.9835	-14.1509	-8.5994
1.105	-59.9855	-14.181	-8.6096
1.11	-59.9871	-14.2113	-8.6198
1.115	-59.9886	-14.2417	-8.63
1.12	-59.9898	-14.2723	-8.6402
1.125	-59.9909	-14.303	-8.6505
1.13	-59.9918	-14.3339	-8.6608
1.135	-59.9926	-14.3649	-8.6711
1.14	-59.9933	-14.3961	-8.6814
1.145	-59.9938	-14.4275	-8.6917
1.15	-59.9943	-14.459	-8.7021
1.155	-59.9948	-14.4907	-8.7125
1.16	-59.9951	-14.5226	-8.7229
1.165	-59.9955	-14.5546	-8.7333
1.17	-59.9957	-14.5868	-8.7438
1.175	-59.996	-14.6192	-8.7542
1.18	-59.9962	-14.6517	-8.7647
1.185	-59.9964	-14.6845	-8.7752
1.19	-59.9965	-14.7174	-8.7858
1.195	-59.9967	-14.7505	-8.7963
1.2	-59.9968	-14.7837	-8.8069
1.205	-59.9969	-14.8172	-8.8175
1.21	-59.997	-14.8508	-8.8282
1.215	-59.997	-14.8846	-8.8388
1.22	-59.9971	-14.9186	-8.8495
1.225	-59.9971	-14.9529	-8.8602
1.23	-59.9972	-14.9873	-8.8709
1.235	-59.9972	-15.0218	-8.8817
1.24	-59.9973	-15.0566	-8.8924
1.245	-59.9973	-15.0916	-8.9032
1.25	-59.9973	-15.1268	-8.914
1.255	-59.9973	-15.1622	-8.9249
1.26	-59.9974	-15.1978	-8.9358
1.265	-59.9974	-15.2336	-8.9467
1.27	-59.9974	-15.2697	-8.9576
1.275	-59.9974	-15.3059	-8.9685
1.28	-59.9974	-15.3424	-8.9795
1.285	-59.9974	-15.379	-8.9905
1.29	-59.9974	-15.4159	-9.0015
1.295	-59.9974	-15.453	-9.0126
1.3	-59.9974	-15.4904	-9.0236
1.305	-59.9975	-15.5279	-9.0347
1.31	-59.9975	-15.5657	-9.0459
1.315	-59.9975	-15.6038	-9.057
1.32	-59.9975	-15.642	-9.0682
1.325	-59.9975	-15.6805	-9.0794
1.33	-59.9975	-15.7193	-9.0906
1.335	-59.9975	-15.7583	-9.1019
1.34	-59.9975	-15.7975	-9.1132
1.345	-59.9975	-15.837	-9.1245
1.35	-59.9975	-15.8767	-9.1358
1.355	-59.9975	-15.9167	-9.1472
1.36	-59.9975	-15.957	-9.1586
1.365	-59.9975	-15.9975	-9.17
1.37	-59.9975	-16.0382	-9.1815
1.375	-59.9975	-16.0793	-9.1929
1.38	-59.9975	-16.1206	-9.2044
1.385	-59.9975	-16.1622	-9.216
1.39	-59.9975	-16.204	-9.2275
1.395	-59.9975	-16.2462	-9.2391
1.4	-59.9975	-16.2886	-9.2507
1.405	-59.9975	-16.3313	-9.2624
1.41	-59.9975	-16.3743	-9.2741
1.415	-59.9975	-16.4176	-9.2858
1.42	-59.9975	-16.4612	-9.2975
1.425	-59.9975	-16.5051	-9.3093
1.43	-59.9975	-16.5493	-9.3211
1.435	-59.9975	-16.5938	-9.3329
1.44	-59.9975	-16.6386	-9.3448
1.445	-59.9975	-16.6838	-9.3566
1.45	-59.9975	-16.7292	-9.3686
1.455	-59.9975	-16.775	-9.3805
1.46	-59.9975	-16.8211	-9.3925
1.465	-59.9975	-16.8676	-9.4045
1.47	-59.9975	-16.9143	-9.4165
1.475	-59.9975	-16.9615	-9.4286
1.48	-59.9975	-17.0089	-9.4407
1.485	-59.9975	-17.0567	-9.4528
1.49	-59.9975	-17.1049	-9.465
1.495	-59.9975	-17.1535	-9.4772
1.5	-59.9975	-17.2024	-9.4894
1.505	-59.9975	-17.2516	-9.5016
1.51	-59.9975	-17.3013	-9.5139
1.515	-59.9975	-17.3513	-9.5263
1.52	-59.9975	-17.4017	-9.5386
1.525	-59.9975	-17.4525	-9.551
1.53	-59.9975	-17.5037	-9.5634
1.535	-59.9975	-17.5553	-9.5759
1.54	-59.9975	-17.6074	-9.5883
1.545	-59.9975	-17.6598	-9.6009
1.55	-59.9975	-17.7126	-9.6134
1.555	-59.9975	-17.7659	-9.626
1.56	-59.9975	-17.8196	-9.6386
1.565	-59.9975	-17.8737	-9.6513
1.57	-59.9975	-17.9283	-9.6639
1.575	-59.9975	-17.9833	-9.6767
1.58	-59.9975	-18.0388	-9.6894
1.585	-59.9975	-18.0948	-9.7022
1.59	-59.9975	-18.1512	-9.715
1.595	-59.9975	-18.2081	-9.7279
1.6	-59.9975	-18.2655	-9.7408
1.605	-59.9975	-18.3234	-9.7537
1.61	-59.9975	-18.3817	-9.7667
1.615	-59.9975	-18.4406	-9.7797
1.62	-59.9975	-18.5	-9.7927
1.625	-59.9975	-18.56	-9.8058
1.63	-59.9975	-18.6204	-9.8189
1.635	-59.9975	-18.6814	-9.832
1.64	-59.9975	-18.743	-9.8452
1.645	-59.9975	-18.8051	-9.8584
1.65	-59.9975	-18.8677	-9.8716
1.655	-59.9975	-18.931	-9.8849
1.66	-59.9975	-18.9948	-9.8982
1.665	-59.9975	-19.0593	-9.9116
1.67	-59.9975	-19.1243	-9.925
1.675	-59.9975	-19.19	-9.9384
1.68	-59.9975	-19.2562	-9.9519
1.685	-59.9975	-19.3231	-9.9654
1.69	-59.9975	-19.3907	-9.979
1.695	-59.9975	-19.4589	-9.9926
1.7	-59.9975	-19.5278	-10.0062
1.705	-59.9975	-19.5974	-10.0199
1.71	-59.9975	-19.6677	-10.0336
1.715	-59.9975	-19.7386	-10.0473
1.72	-59.9975	-19.8103	-10.0611
1.725	-59.9975	-19.8828	-10.0749
1.73	-59.9975	-19.9559	-10.0888
1.735	-59.9975	-20.0299	-10.1027
1.74	-59.9975	-20.1046	-10.1166
1.745	-59.9975	-20.1801	-10.1306
1.75	-59.9975	-20.2563	-10.1446
1.755	-59.9975	-20.3335	-10.1587
1.76	-59.9975	-20.4114	-10.1728
1.765	-59.9975	-20.4902	-10.1869
1.77	-59.9975	-20.5699	-10.2011
1.775	-59.9975	-20.6504	-10.2154
1.78	-59.9975	-20.7319	-10.2296
1.785	-59.9975	-20.8142	-10.2439
1.79	-59.9975	-20.8975	-10.2583
1.795	-59.9975	-20.9818	-10.2727
1.8	-59.9975	-21.067	-10.2871
1.805	-59.9975	-21.1532	-10.3016
1.81	-59.9975	-21.2405	-10.3162
1.815	-59.9975	-21.3288	-10.3307
1.82	-59.9975	-21.4181	-10.3453
1.825	-59.9975	-21.5086	-10.36
1.83	-59.9975	-21.6001	-10.3747
1.835	-59.9975	-21.6927	-10.3894
1.84	-59.9975	-21.7866	-10.4042
1.845	-59.9975	-21.8816	-10.4191
1.85	-59.9975	-21.9778	-10.434
1.855	-59.9975	-22.0752	-10.4489
1.86	-59.9975	-22.1739	-10.4638
1.865	-59.9975	-22.2739	-10.4789
1.87	-59.9975	-22.3752	-10.4939
1.875	-59.9975	-22.4779	-10.509
1.88	-59.9975	-22.582	-10.5242
1.885	-59.9975	-22.6874	-10.5394
1.89	-59.9975	-22.7944	-10.5546
1.895	-59.9975	-22.9028	-10.5699
1.9	-59.9975	-23.0127	-10.5853
1.905	-59.9975	-23.1242	-10.6007
1.91	-59.9975	-23.2373	-10.6161
1.915	-59.9975	-23.3521	-10.6316
1.92	-59.9975	-23.4685	-10.6472
1.925	-59.9975	-23.5867	-10.6627
1.93	-59.9975	-23.7066	-10.6784
1.935	-59.9975	-23.8284	-10.6941
1.94	-59.9975	-23.952	-10.7098
1.945	-59.9975	-24.0776	-10.7256
1.95	-59.9975	-24.2051	-10.7414
1.955	-59.9975	-24.3347	-10.7573
1.96	-59.9975	-24.4663	-10.7732
1.965	-59.9975	-24.6001	-10.7892
1.97	-59.9975	-24.7361	-10.8053
1.975	-59.9975	-24.8744	-10.8213
1.98	-59.9975	-25.015	-10.8375
1.985	-59.9975	-25.158	-10.8537
1.99	-59.9975	-25.3035	-10.8699
1.995	-59.9975	-25.4516	-10.8862
2	-59.9975	-25.6023	-10.9026
2.005	-59.9975	-25.7557	-10.919
2.01	-59.9975	-25.9119	-10.9355
2.015	-59.9975	-26.0711	-10.952
2.02	-59.9975	-26.2332	-10.9685
2.025	-59.9975	-26.3984	-10.9852
2.03	-59.9975	-26.5667	-11.0018
2.035	-59.9975	-26.7384	-11.0186
2.04	-59.9975	-26.9135	-11.0354
2.045	-59.9975	-27.0921	-11.0522
2.05	-59.9975	-27.2744	-11.0691
2.055	-59.9975	-27.4605	-11.0861
2.06	-59.9975	-27.6504	-11.1031
2.065	-59.9975	-27.8444	-11.1202
2.07	-59.9975	-28.0427	-11.1373
2.075	-59.9975	-28.2453	-11.1545
2.08	-59.9975	-28.4524	-11.1717
2.085	-59.9975	-28.6643	-11.189
2.09	-59.9975	-28.881	-11.2064
2.095	-59.9975	-29.1028	-11.2238
2.1	-59.9975	-29.3299	-11.2413
2.105	-59.9975	-29.5625	-11.2588
2.11	-59.9975	-29.8008	-11.2764
2.115	-59.9975	-30.0451	-11.2941
2.12	-59.9975	-30.2956	-11.3118
2.125	-59.9975	-30.5526	-11.3296
2.13	-59.9975	-30.8164	-11.3475
2.135	-59.9975	-31.0872	-11.3654
2.14	-59.9975	-31.3654	-11.3833
2.145	-59.9975	-31.6514	-11.4014
2.15	-59.9975	-31.9453	-11.4195
2.155	-59.9975	-32.2478	-11.4376
2.16	-59.9975	-32.559	-11.4559
2.165	-59.9975	-32.8795	-11.4742
2.17	-59.9975	-33.2097	-11.4925
2.175	-59.9975	-33.55	-11.511
2.18	-59.9975	-33.901	-11.5294
2.185	-59.9975	-34.2632	-11.548
2.19	-59.9975	-34.637	-11.5666
2.195	-59.9975	-35.0232	-11.5853
2.2	-59.9975	-35.4223	-11.6041
2.205	-59.9975	-35.835	-11.6229
2.21	-59.9975	-36.2618	-11.6418
2.215	-59.9975	-36.7037	-11.6607
2.22	-59.9975	-37.1611	-11.6798
2.225	-59.9975	-37.635	-11.6989
2.23	-59.9975	-38.1261	-11.7181
2.235	-59.9975	-38.6352	-11.7373
2.24	-59.9975	-39.163	-11.7566
2.245	-59.9975	-39.7104	-11.776
2.25	-59.9975	-40.278	-11.7955
2.255	-59.9975	-40.8667	-11.815
2.26	-59.9975	-41.477	-11.8346
2.265	-59.9975	-42.1095	-11.8543
2.27	-59.9975	-42.7644	-11.874
2.275	-59.9975	-43.442	-11.8938
2.28	-59.9975	-44.142	-11.9137
2.285	-59.9975	-44.8639	-11.9337
2.29	-59.9975	-45.6068	-11.9538
2.295	-59.9975	-46.369	-11.9739
2.3	-59.9975	-47.1483	-11.9941
2.305	-59.9975	-47.9417	-12.0144
2.31	-59.9975	-48.7452	-12.0347
2.315	-59.9975	-49.5541	-12.0552
2.32	-59.9975	-50.3624	-12.0757
2.325	-59.9975	-51.1637	-12.0963
2.33	-59.9975	-51.9505	-12.117
2.335	-59.9975	-52.7153	-12.1377
2.34	-59.9975	-53.4506	-12.1586
2.345	-59.9975	-54.149	-12.1795
2.35	-59.9975	-54.8046	-12.2005
2.355	-59.9975	-55.4126	-12.2216
2.36	-59.9975	-55.9699	-12.2427
2.365	-59.9975	-56.4751	-12.264
2.37	-59.9975	-56.9285	-12.2853
2.375	-59.9975	-57.3318	-12.3067
2.38	-59.9975	-57.6878	-12.3283
2.385	-59.9975	-58.0002	-12.3498
2.39	-59.9975	-58.2728	-12.3715
2.395	-59.9975	-58.5099	-12.3933
2.4	-59.9975	-58.7154	-12.4152
2.405	-59.9975	-58.8931	-12.4371
2.41	-59.9975	-59.0466	-12.4591
2.415	-59.9975	-59.179	-12.4813
2.42	-59.9975	-59.293	-12.5035
2.425	-59.9975	-59.3912	-12.5258
2.43	-59.9975	-59.4758	-12.5482
2.435	-59.9975	-59.5486	-12.5707
2.44	-59.9975	-59.6112	-12.5933
2.445	-59.9975	-59.6651	-12.616
2.45	-59.9975	-59.7115	-12.6387
2.455	-59.9975	-59.7514	-12.6616
2.46	-59.9975	-59.7858	-12.6846
2.465	-59.9975	-59.8153	-12.7077
2.47	-59.9975	-59.8407	-12.7308
2.475	-59.9975	-59.8626	-12.7541
2.48	-59.9975	-59.8814	-12.7774
2.485	-59.9975	-59.8976	-12.8009
2.49	-59.9975	-59.9115	-12.8245
2.495	-59.9975	-59.9235	-12.8481
2.5	-59.9975	-59.9338	-12.8719
2.505	-59.9975	-59.9427	-12.8958
2.51	-59.9975	-59.9503	-12.9198
2.515	-59.9975	-59.9569	-12.9438
2.52	-59.9975	-59.9625	-12.968
2.525	-59.9975	-59.9674	-12.9923
2.53	-59.9975	-59.9716	-13.0167
2.535	-59.9975	-59.9752	-13.0412
2.54	-59.9975	-59.9783	-13.0658
2.545	-59.9975	-59.9809	-13.0906
2.55	-59.9975	-59.9832	-13.1154
2.555	-59.9975	-59.9852	-13.1403
2.56	-59.9975	-59.9869	-13.1654
2.565	-59.9975	-59.9884	-13.1906
2.57	-59.9975	-59.9896	-13.2159
2.575	-59.9975	-59.9907	-13.2413
2.58	-59.9975	-59.9917	-13.2668
2.585	-59.9975	-59.9925	-13.2924
2.59	-59.9975	-59.9932	-13.3182
2.595	-59.9975	-59.9938	-13.344
2.6	-59.9975	-59.9943	-13.37
2.605	-59.9975	-59.9947	-13.3961
2.61	-59.9975	-59.9951	-13.4224
2.615	-59.9975	-59.9954	-13.4487
2.62	-59.9975	-59.9957	-13.4752
2.625	-59.9975	-59.996	-13.5018
2.63	-59.9975	-59.9962	-13.5285
2.635	-59.9975	-59.9963	-13.5554
2.64	-59.9975	-59.9965	-13.5824
2.645	-59.9975	-59.9966	-13.6095
2.65	-59.9975	-59.9968	-13.6367
2.655	-59.9975	-59.9969	-13.6641
2.66	-59.9975	-59.9969	-13.6916
2.665	-59.9975	-59.997	-13.7193
2.67	-59.9975	-59.9971	-13.747
2.675	-59.9975	-59.9971	-13.7749
2.68	-59.9975	-59.9972	-13.803
2.685	-59.9975	-59.9972	-13.8312
2.69	-59.9975	-59.9973	-13.8595
2.695	-59.9975	-59.9973	-13.888
2.7	-59.9975	-59.9973	-13.9166
2.705	-59.9975	-59.9973	-13.9453
2.71	-59.9975	-59.9974	-13.9742
2.715	-59.9975	-59.9974	-14.0033
2.72	-59.9975	-59.9974	-14.0325
2.725	-59.9975	-59.9974	-14.0618
2.73	-59.9975	-59.9974	-14.0913
2.735	-59.9975	-59.9974	-14.1209
2.74	-59.9975	-59.9974	-14.1507
2.745	-59.9975	-59.9974	-14.1807
2.75	-59.9975	-59.9974	-14.2108
2.755	-59.9975	-59.9975	-14.241
2.76	-59.9975	-59.9975	-14.2714
2.765	-59.9975	-59.9975	-14.302
2.77	-59.9975	-59.9975	-14.3327
2.775	-59.9975	-59.9975	-14.3636
2.78	-59.9975	-59.9975	-14.3947
2.785	-59.9975	-59.9975	-14.4259
2.79	-59.9975	-59.9975	-14.4573
2.795	-59.9975	-59.9975	-14.4889
2.8	-59.9975	-59.9975	-14.5206
2.805	-59.9975	-59.9975	-14.5525
2.81	-59.9975	-59.9975	-14.5846
2.815	-59.9975	-59.9975	-14.6168
2.82	-59.9975	-59.9975	-14.6493
2.825	-59.9975	-59.9975	-14.6819
2.83	-59.9975	-59.9975	-14.7147
2.835	-59.9975	-59.9975	-14.7476
2.84	-59.9975	-59.9975	-14.7808
2.845	-59.9975	-59.9975	-14.8141
2.85	-59.9975	-59.9975	-14.8477
2.855	-59.9975	-59.9975	-14.8814
2.86	-59.9975	-59.9975	-14.9153
2.865	-59.9975	-59.9975	-14.9494
2.87	-59.9975	-59.9975	-14.9837
2.875	-59.9975	-59.9975	-15.0182
2.88	-59.9975	-59.9975	-15.0529
2.885	-59.9975	-59.9975	-15.0878
2.89	-59.9975	-59.9975	-15.1229
2.895	-59.9975	-59.9975	-15.1582
2.9	-59.9975	-59.9975	-15.1937
2.905	-59.9975	-59.9975	-15.2294
2.91	-59.9975	-59.9975	-15.2654
2.915	-59.9975	-59.9975	-15.3015
2.92	-59.9975	-59.9975	-15.3379
2.925	-59.9975	-59.9975	-15.3745
2.93	-59.9975	-59.9975	-15.4113
2.935	-59.9975	-59.9975	-15.4483
2.94	-59.9975	-59.9975	-15.4856
2.945	-59.9975	-59.9975	-15.523
2.95	-59.9975	-59.9975	-15.5608
2.955	-59.9975	-59.9975	-15.5987
2.96	-59.9975	-59.9975	-15.6369
2.965	-59.9975	-59.9975	-15.6753
2.97	-59.9975	-59.9975	-15.714
2.975	-59.9975	-59.9975	-15.7529
2.98	-59.9975	-59.9975	-15.7921
2.985	-59.9975	-59.9975	-15.8315
2.99	-59.9975	-59.9975	-15.8711
2.995	-59.9975	-59.9975	-15.911
3	-59.9975	-59.9975	-15.9512
3.005	-59.9975	-59.9975	-15.9917
3.01	-59.9975	-59.9975	-16.0324
3.015	-59.9975	-59.9975	-16.0733
3.02	-59.9975	-59.9975	-16.1146
3.025	-59.9975	-59.9975	-16.1561
3.03	-59.9975	-59.9975	-16.1979
3.035	-59.9975	-59.9975	-16.2399
3.04	-59.9975	-59.9975	-16.2823
3.045	-59.9975	-59.9975	-16.3249
3.05	-59.9975	-59.9975	-16.3678
3.055	-59.9975	-59.9975	-16.4111
3.06	-59.9975	-59.9975	-16.4546
3.065	-59.9975	-59.9975	-16.4984
3.07	-59.9975	-59.9975	-16.5425
3.075	-59.9975	-59.9975	-16.587
3.08	-59.9975	-59.9975	-16.6317
3.085	-59.9975	-59.9975	-16.6768
3.09	-59.9975	-59.9975	-16.7222
3.095	-59.9975	-59.9975	-16.7679
3.1	-59.9975	-59.9975	-16.8139
3.105	-59.9975	-59.9975	-16.8603
3.11	-59.9975	-59.9975	-16.907
3.115	-59.9975	-59.9975	-16.9541
3.12	-59.9975	-59.9975	-17.0015
3.125	-59.9975	-59.9975	-17.0492
3.13	-59.9975	-59.9975	-17.0973
3.135	-59.9975	-59.9975	-17.1458
3.14	-59.9975	-59.9975	-17.1946
3.145	-59.9975	-59.9975	-17.2438
3.15	-59.9975	-59.9975	-17.2934
3.155	-59.9975	-59.9975	-17.3433
3.16	-59.9975	-59.9975	-17.3937
3.165	-59.9975	-59.9975	-17.4444
3.17	-59.9975	-59.9975	-17.4955
3.175	-59.9975	-59.9975	-17.547
3.18	-59.9975	-59.9975	-17.599
3.185	-59.9975	-59.9975	-17.6513
3.19	-59.9975	-59.9975	-17.7041
3.195	-59.9975	-59.9975	-17.7573
3.2	-59.9975	-59.9975	-17.8109
3.205	-59.9975	-59.9975	-17.8649
3.21	-59.9975	-59.9975	-17.9194
3.215	-59.9975	-59.9975	-17.9744
3.22	-59.9975	-59.9975	-18.0298
3.225	-59.9975	-59.9975	-18.0857
3.23	-59.9975	-59.9975	-18.142
3.235	-59.9975	-59.9975	-18.1988
3.24	-59.9975	-59.9975	-18.2561
3.245	-59.9975	-59.9975	-18.3139
3.25	-59.9975	-59.9975	-18.3722
3.255	-59.9975	-59.9975	-18.431
3.26	-59.9975	-59.9975	-18.4903
3.265	-59.9975	-59.9975	-18.5501
3.27	-59.9975	-59.9975	-18.6105
3.275	-59.9975	-59.9975	-18.6714
3.28	-59.9975	-59.9975	-18.7328
3.285	-59.9975	-59.9975	-18.7949
3.29	-59.9975	-59.9975	-18.8574
3.295	-59.9975	-59.9975	-18.9206
3.3	-59.9975	-59.9975	-18.9843
3.305	-59.9975	-59.9975	-19.0486
3.31	-59.9975	-59.9975	-19.1136
3.315	-59.9975	-59.9975	-19.1791
3.32	-59.9975	-59.9975	-19.2453
3.325	-59.9975	-59.9975	-19.3121
3.33	-59.9975	-59.9975	-19.3795
3.335	-59.9975	-59.9975	-19.4476
3.34	-59.9975	-59.9975	-19.5164
3.345	-59.9975	-59.9975	-19.5859
3.35	-59.9975	-59.9975	-19.656
3.355	-59.9975	-59.9975	-19.7269
3.36	-59.9975	-59.9975	-19.7984
3.365	-59.9975	-59.9975	-19.8707
3.37	-59.9975	-59.9975	-19.9438
3.375	-59.9975	-59.9975	-20.0176
3.38	-59.9975	-59.9975	-20.0922
3.385	-59.9975	-59.9975	-20.1675
3.39	-59.9975	-59.9975	-20.2437
3.395	-59.9975	-59.9975	-20.3206
3.4	-59.9975	-59.9975	-20.3985
3.405	-59.9975	-59.9975	-20.4771
3.41	-59.9975	-59.9975	-20.5566
3.415	-59.9975	-59.9975	-20.637
3.42	-59.9975	-59.9975	-20.7183
3.425	-59.9975	-59.9975	-20.8005
3.43	-59.9975	-59.9975	-20.8837
3.435	-59.9975	-59.9975	-20.9678
3.44	-59.9975	-59.9975	-21.0528
3.445	-59.9975	-59.9975	-21.1389
3.45	-59.9975	-59.9975	-21.226
3.455	-59.9975	-59.9975	-21.3141
3.46	-59.9975	-59.9975	-21.4032
3.465	-59.9975	-59.9975	-21.4935
3.47	-59.9975	-59.9975	-21.5848
3.475	-59.9975	-59.9975	-21.6773
3.48	-59.9975	-59.9975	-21.7709
3.485	-59.9975	-59.9975	-21.8657
3.49	-59.9975	-59.9975	-21.9617
3.495	-59.9975	-59.9975	-22.059
3.5	-59.9975	-59.9975	-22.1574
3.505	-59.9975	-59.9975	-22.2572
3.51	-59.9975	-59.9975	-22.3583
3.515	-59.9975	-59.9975	-22.4608
3.52	-59.9975	-59.9975	-22.5646
3.525	-59.9975	-59.9975	-22.6698
3.53	-59.9975	-59.9975	-22.7765
3.535	-59.9975	-59.9975	-22.8847
3.54	-59.9975	-59.9975	-22.9943
3.545	-59.9975	-59.9975	-23.1056
3.55	-59.9975	-59.9975	-23.2184
3.555	-59.9975	-59.9975	-23.3329
3.56	-59.9975	-59.9975	-23.449
3.565	-59.9975	-59.9975	-23.5669
3.57	-59.9975	-59.9975	-23.6866
3.575	-59.9975	-59.9975	-23.808
3.58	-59.9975	-59.9975	-23.9313
3.585	-59.9975	-59.9975	-24.0566
3.59	-59.9975	-59.9975	-24.1838
3.595	-59.9975	-59.9975	-24.313
3.6	-59.9975	-59.9975	-24.4443
3.605	-59.9975	-59.9975	-24.5777
3.61	-59.9975	-59.9975	-24.7133
3.615	-59.9975	-59.9975	-24.8512
3.62	-59.9975	-59.9975	-24.9915
3.625	-59.9975	-59.9975	-25.1341
3.63	-59.9975	-59.9975	-25.2792
3.635	-59.9975	-59.9975	-25.4268
3.64	-59.9975	-59.9975	-25.5771
3.645	-59.9975	-59.9975	-25.73
3.65	-59.9975	-59.9975	-25.8858
3.655	-59.9975	-59.9975	-26.0444
3.66	-59.9975	-59.9975	-26.206
3.665	-59.9975	-59.9975	-26.3707
3.67	-59.9975	-59.9975	-26.5385
3.675	-59.9975	-59.9975	-26.7096
3.68	-59.9975	-59.9975	-26.8842
3.685	-59.9975	-59.9975	-27.0622
3.69	-59.9975	-59.9975	-27.2438
3.695	-59.9975	-59.9975	-27.4292
3.7	-59.9975	-59.9975	-27.6186
3.705	-59.9975	-59.9975	-27.8119
3.71	-59.9975	-59.9975	-28.0094
3.715	-59.9975	-59.9975	-28.2113
3.72	-59.9975	-59.9975	-28.4177
3.725	-59.9975	-59.9975	-28.6287
3.73	-59.9975	-59.9975	-28.8446
3.735	-59.9975	-59.9975	-29.0656
3.74	-59.9975	-59.9975	-29.2918
3.745	-59.9975	-59.9975	-29.5234
3.75	-59.9975	-59.9975	-29.7608
3.755	-59.9975	-59.9975	-30.0041
3.76	-59.9975	-59.9975	-30.2535
3.765	-59.9975	-59.9975	-30.5094
3.77	-59.9975	-59.9975	-30.7721
3.775	-59.9975	-59.9975	-31.0417
3.78	-59.9975	-59.9975	-31.3187
3.785	-59.9975	-59.9975	-31.6033
3.79	-59.9975	-59.9975	-31.8959
3.795	-59.9975	-59.9975	-32.1969
3.8	-59.9975	-59.9975	-32.5066
3.805	-59.9975	-59.9975	-32.8255
3.81	-59.9975	-59.9975	-33.1541
3.815	-59.9975	-59.9975	-33.4927
3.82	-59.9975	-59.9975	-33.8419
3.825	-59.9975	-59.9975	-34.2021
3.83	-59.9975	-59.9975	-34.574
3.835	-59.9975	-59.9975	-34.9581
3.84	-59.9975	-59.9975	-35.355
3.845	-59.9975	-59.9975	-35.7654
3.85	-59.9975	-59.9975	-36.1898
3.855	-59.9975	-59.9975	-36.6291
3.86	-59.9975	-59.9975	-37.0839
3.865	-59.9975	-59.9975	-37.555
3.87	-59.9975	-59.9975	-38.0432
3.875	-59.9975	-59.9975	-38.5492
3.88	-59.9975	-59.9975	-39.0739
3.885	-59.9975	-59.9975	-39.6179
3.89	-59.9975	-59.9975	-40.1822
3.895	-59.9975	-59.9975	-40.7673
3.9	-59.9975	-59.9975	-41.374
3.905	-59.9975	-59.9975	-42.0027
3.91	-59.9975	-59.9975	-42.6539
3.915	-59.9975	-59.9975	-43.3277
3.92	-59.9975	-59.9975	-44.024
3.925	-59.9975	-59.9975	-44.7424
3.93	-59.9975	-59.9975	-45.4819
3.935	-59.9975	-59.9975	-46.241
3.94	-59.9975	-59.9975	-47.0177
3.945	-59.9975	-59.9975	-47.8089
3.95	-59.9975	-59.9975	-48.6111
3.955	-59.9975	-59.9975	-49.4194
3.96	-59.9975	-59.9975	-50.2283
3.965	-59.9975	-59.9975	-51.0312
3.97	-59.9975	-59.9975	-51.821
3.975	-59.9975	-59.9975	-52.59
3.98	-59.9975	-59.9975	-53.3306
3.985	-59.9975	-59.9975	-54.0357
3.99	-59.9975	-59.9975	-54.6988
3.995	-59.9975	-59.9975	-55.315
4	-59.9975	-59.9975	-55.8808
4.005	-59.9975	-59.9975	-56.3947
4.01	-59.9975	-59.9975	-56.8566
4.015	-59.9975	-59.9975	-57.268
4.02	-59.9975	-59.9975	-57.6317
4.025	-59.9975	-59.9975	-57.9511
4.03	-59.9975	-59.9975	-58.2301
4.035	-59.9975	-59.9975	-58.4728
4.04	-59.9975	-59.9975	-58.6833
4.045	-59.9975	-59.9975	-58.8653
4.05	-59.9975	-59.9975	-59.0226
4.055	-59.9975	-59.9975	-59.1583
4.06	-59.9975	-59.9975	-59.2752
4.065	-59.9975	-59.9975	-59.3759
4.07	-59.9975	-59.9975	-59.4626
4.075	-59.9975	-59.9975	-59.5372
4.08	-59.9975	-59.9975	-59.6015
4.085	-59.9975	-59.9975	-59.6567
4.09	-59.9975	-59.9975	-59.7043
4.095	-59.9975	-59.9975	-59.7452
4.1	-59.9975	-59.9975	-59.7804
4.105	-59.9975	-59.9975	-59.8107
4.11	-59.9975	-59.9975	-59.8367
4.115	-59.9975	-59.9975	-59.8592
4.12	-59.9975	-59.9975	-59.8784
4.125	-59.9975	-59.9975	-59.895
4.13	-59.9975	-59.9975	-59.9093
4.135	-59.9975	-59.9975	-59.9216
4.14	-59.9975	-59.9975	-59.9322
4.145	-59.9975	-59.9975	-59.9413
4.15	-59.9975	-59.9975	-59.9491
4.155	-59.9975	-59.9975	-59.9558
4.16	-59.9975	-59.9975	-59.9616
4.165	-59.9975	-59.9975	-59.9666
4.17	-59.9975	-59.9975	-59.9709
4.175	-59.9975	-59.9975	-59.9746
4.18	-59.9975	-59.9975	-59.9778
4.185	-59.9975	-59.9975	-59.9805
4.19	-59.9975	-59.9975	-59.9829
4.195	-59.9975	-59.9975	-59.9849
4.2	-59.9975	-59.9975	-59.9866
4.205	-59.9975	-59.9975	-59.9882
4.21	-59.9975	-59.9975	-59.9894
4.215	-59.9975	-59.9975	-59.9906
4.22	-59.9975	-59.9975	-59.9915
4.225	-59.9975	-59.9975	-59.9923
4.23	-59.9975	-59.9975	-59.9931
4.235	-59.9975	-59.9975	-59.9937
4.24	-59.9975	-59.9975	-59.9942
4.245	-59.9975	-59.9975	-59.9947
4.25	-59.9975	-59.9975	-59.995
4.255	-59.9975	-59.9975	-59.9954
4.26	-59.9975	-59.9975	-59.9957
4.265	-59.9975	-59.9975	-59.9959
4.27	-59.9975	-59.9975	-59.9961
4.275	-59.9975	-59.9975	-59.9963
4.28	-59.9975	-59.9975	-59.9965
4.285	-59.9975	-59.9975	-59.9966
4.29	-59.9975	-59.9975	-59.9967
4.295	-59.9975	-59.9975	-59.9968
4.3	-59.9975	-59.9975	-59.9969
4.305	-59.9975	-59.9975	-59.997
4.31	-59.9975	-59.9975	-59.9971
4.315	-59.9975	-59.9975	-59.9971
4.32	-59.9975	-59.9975	-59.9972
4.325	-59.9975	-59.9975	-59.9972
4.33	-59.9975	-59.9975	-59.9973
4.335	-59.9975	-59.9975	-59.9973
4.34	-59.9975	-59.9975	-59.9973
4.345	-59.9975	-59.9975	-59.9973
4.35	-59.9975	-59.9975	-59.9974
4.355	-59.9975	-59.9975	-59.9974
4.36	-59.9975	-59.9975	-59.9974
4.365	-59.9975	-59.9975	-59.9974
4.37	-59.9975	-59.9975	-59.9974
4.375	-59.9975	-59.9975	-59.9974
4.38	-59.9975	-59.9975	-59.9974
4.385	-59.9975	-59.9975	-59.9974
4.39	-59.9975	-59.9975	-59.9974
4.395	-59.9975	-59.9975	-59.9975
4.4	-59.9975	-59.9975	-59.9975
4.405	-59.9975	-59.9975	-59.9975
4.41	-59.9975	-59.9975	-59.9975
4.415	-59.9975	-59.9975	-59.9975
4.42	-59.9975	-59.9975	-59.9975
4.425	-59.9975	-59.9975	-59.9975
4.43	-59.9975	-59.9975	-59.9975
4.435	-59.9975	-59.9975	-59.9975
4.44	-59.9975	-59.9975	-59.9975
4.445	-59.9975	-59.9975	-59.9975
4.45	-59.9975	-59.9975	-59.9975
4.455	-59.9975	-59.9975	-59.9975
4.46	-59.9975	-59.9975	-59.9975
4.465	-59.9975	-59.9975	-59.9975
4.47	-59.9975	-59.9975	-59.9975
4.475	-59.9975	-59.9975	-59.9975
4.48	-59.9975	-59.9975	-59.9975
4.485	-59.9975	-59.9975	-59.9975
4.49	-59.9975	-59.9975	-59.9975
4.495	-59.9975	-59.9975	-59.9975
4.5	-59.9975	-59.9975	-59.9975
4.505	-59.9975	-59.9975	-59.9975
4.51	-59.9975	-59.9975	-59.9975
4.515	-59.9975	-59.9975	-59.9975
4.52	-59.9975	-59.9975	-59.9975
4.525	-59.9975	-59.9975	-59.9975
4.53	-59.9975	-59.9975	-59.9975
4.535	-59.9975	-59.9975	-59.9975
4.54	-59.9975	-59.9975	-59.9975
4.545	-59.9975	-59.9975	-59.9975
4.55	-59.9975	-59.9975	-59.9975
4.555	-59.9975	-59.9975	-59.9975
4.56	-59.9975	-59.9975	-59.9975
4.565	-59.9975	-59.9975	-59.9975
4.57	-59.9975	-59.9975	-59.9975
4.575	-59.9975	-59.9975	-59.9975
4.58	-59.9975	-59.9975	-59.9975
4.585	-59.9975	-59.9975	-59.9975
4.59	-59.9975	-59.9975	-59.9975
4.595	-59.9975	-59.9975	-59.9975
4.6	-59.9975	-59.9975	-59.9975
4.605	-59.9975	-59.9975	-59.9975
4.61	-59.9975	-59.9975	-59.9975
4.615	-59.9975	-59.9975	-59.9975
4.62	-59.9975	-59.9975	-59.9975
4.625	-59.9975	-59.9975	-59.9975
4.63	-59.9975	-59.9975	-59.9975
4.635	-59.9975	-59.9975	-59.9975
4.64	-59.9975	-59.9975	-59.9975
4.645	-59.9975	-59.9975	-59.9975
4.65	-59.9975	-59.9975	-59.9975
4.655	-59.9975	-59.9975	-59.9975
4.66	-59.9975	-59.9975	-59.9975
4.665	-59.9975	-59.9975	-59.9975
4.67	-59.9975	-59.9975	-59.9975
4.675	-59.9975	-59.9975	-59.9975
4.68	-59.9975	-59.9975	-59.9975
4.685	-59.9975	-59.9975	-59.9975
4.69	-59.9975	-59.9975	-59.9975
4.695	-59.9975	-59.9975	-59.9975
4.7	-59.9975	-59.9975	-59.9975
4.705	-59.9975	-59.9975	-59.9975
4.71	-59.9975	-59.9975	-59.9975
4.715	-59.9975	-59.9975	-59.9975
4.72	-59.9975	-59.9975	-59.9975
4.725	-59.9975	-59.9975	-59.9975
4.73	-59.9975	-59.9975	-59.9975
4.735	-59.9975	-59.9975	-59.9975
4.74	-59.9975	-59.9975	-59.9975
4.745	-59.9975	-59.9975	-59.9975
4.75	-59.9975	-59.9975	-59.9975
4.755	-59.9975	-59.9975	-59.9975
4.76	-59.9975	-59.9975	-59.9975
4.765	-59.9975	-59.9975	-59.9975
4.77	-59.9975	-59.9975	-59.9975
4.775	-59.9975	-59.9975	-59.9975
4.78	-59.9975	-59.9975	-59.9975
4.785	-59.9975	-59.9975	-59.9975
4.79	-59.9975	-59.9975	-59.9975
4.795	-59.9975	-59.9975	-59.9975
4.8	-59.9975	-59.9975	-59.9975
4.805	-59.9975	-59.9975	-59.9975
4.81	-59.9975	-59.9975	-59.9975
4.815	-59.9975	-59.9975	-59.9975
4.82	-59.9975	-59.9975	-59.9975
4.825	-59.9975	-59.9975	-59.9975
4.83	-59.9975	-59.9975	-59.9975
4.835	-59.9975	-59.9975	-59.9975
4.84	-59.9975	-59.9975	-59.9975
4.845	-59.9975	-59.9975	-59.9975
4.85	-59.9975	-59.9975	-59.9975
4.855	-59.9975	-59.9975	-59.9975
4.86	-59.9975	-59.9975	-59.9975
4.865	-59.9975	-59.9975	-59.9975
4.87	-59.9975	-59.9975	-59.9975
4.875	-59.9975	-59.9975	-59.9975
4.88	-59.9975	-59.9975	-59.9975
4.885	-59.9975	-59.9975	-59.9975
4.89	-59.9975	-59.9975	-59.9975
4.895	-59.9975	-59.9975	-59.9975
4.9	-59.9975	-59.9975	-59.9975
4.905	-59.9975	-59.9975	-59.9975
4.91	-59.9975	-59.9975	-59.9975
4.915	-59.9975	-59.9975	-59.9975
4.92	-59.9975	-59.9975	-59.9975
4.925	-59.9975	-59.9975	-59.9975
4.93	-59.9975	-59.9975	-59.9975
4.935	-59.9975	-59.9975	-59.9975
4.94	-59.9975	-59.9975	-59.9975
4.945	-59.9975	-59.9975	-59.9975
4.95	-59.9975	-59.9975	-59.9975
4.955	-59.9975	-59.9975	-59.9975
4.96	-59.9975	-59.9975	-59.9975
4.965	-59.9975	-59.9975	-59.9975
4.97	-59.9975	-59.9975	-59.9975
4.975	-59.9975	-59.9975	-59.9975
4.98	-59.9975	-59.9975	-59.9975
4.985	-59.9975	-59.9975	-59.9975
4.99	-59.9975	-59.9975	-59.9975
4.995	-59.9975	-59.9975	-59.9975
5	-59.9975	-59.9975	-59.9975
5.005	-59.9975	-59.9975	-59.9975
5.01	-59.9975	-59.9975	-59.9975
5.015	-59.9975	-59.9975	-59.9975
5.02	-59.9975	-59.9975	-59.9975
5.025	-59.9975	-59.9975	-59.9975
5.03	-59.9975	-59.9975	-59.9975
5.035	-59.9975	-59.9975	-59.9975
5.04	-59.9975	-59.9975	-59.9975
5.045	-59.9975	-59.9975	-59.9975
5.05	-59.9975	-59.9975	-59.9975
5.055	-59.9975	-59.9975	-59.9975
5.06	-59.9975	-59.9975	-59.9975
5.065	-59.9975	-59.9975	-59.9975
5.07	-59.9975	-59.9975	-59.9975
5.075	-59.9975	-59.9975	-59.9975
5.08	-59.9975	-59.9975	-59.9975
5.085	-59.9975	-59.9975	-59.9975
5.09	-59.9975	-59.9975	-59.9975
5.095	-59.9975	-59.9975	-59.9975
5.1	-59.9975	-59.9975	-59.9975
5.105	-59.9975	-59.9975	-59.9975
5.11	-59.9975	-59.9975	-59.9975
5.115	-59.9975	-59.9975	-59.9975
5.12	-59.9975	-59.9975	-59.9975
5.125	-59.9975	-59.9975	-59.9975
5.13	-59.9975	-59.9975	-59.9975
5.135	-59.9975	-59.9975	-59.9975
5.14	-59.9975	-59.9975	-59.9975
5.145	-59.9975	-59.9975	-59.9975
5.15	-59.9975	-59.9975	-59.9975
5.155	-59.9975	-59.9975	-59.9975
5.16	-59.9975	-59.9975	-59.9975
5.165	-59.9975	-59.9975	-59.9975
5.17	-59.9975	-59.9975	-59.9975
5.175	-59.9975	-59.9975	-59.9975
5.18	-59.9975	-59.9975	-59.9975
5.185	-59.9975	-59.9975	-59.9975
5.19	-59.9975	-59.9975	-59.9975
5.195	-59.9975	-59.9975	-59.9975
5.2	-59.9975	-59.9975	-59.9975
5.205	-59.9975	-59.9975	-59.9975
5.21	-59.9975	-59.9975	-59.9975
5.215	-59.9975	-59.9975	-59.9975
5.22	-59.9975	-59.9975	-59.9975
5.225	-59.9975	-59.9975	-59.9975
5.23	-59.9975	-59.9975	-59.9975
5.235	-59.9975	-59.9975	-59.9975
5.24	-59.9975	-59.9975	-59.9975
5.245	-59.9975	-59.9975	-59.9975
5.25	-59.9975	-59.9975	-59.9975
5.255	-59.9975	-59.9975	-59.9975
5.26	-59.9975	-59.9975	-59.9975
5.265	-59.9975	-59.9975	-59.9975
5.27	-59.9975	-59.9975	-59.9975
5.275	-59.9975	-59.9975	-59.9975
5.28	-59.9975	-59.9975	-59.9975
5.285	-59.9975	-59.9975	-59.9975
5.29	-59.9975	-59.9975	-59.9975
5.295	-59.9975	-59.9975	-59.9975
5.3	-59.9975	-59.9975	-59.9975
5.305	-59.9975	-59.9975	-59.9975
5.31	-59.9975	-59.9975	-59.9975
5.315	-59.9975	-59.9975	-59.9975
5.32	-59.9975	-59.9975	-59.9975
5.325	-59.9975	-59.9975	-59.9975
5.33	-59.9975	-59.9975	-59.9975
5.335	-59.9975	-59.9975	-59.9975
5.34	-59.9975	-59.9975	-59.9975
5.345	-59.9975	-59.9975	-59.9975
5.35	-59.9975	-59.9975	-59.9975
5.355	-59.9975	-59.9975	-59.9975
5.36	-59.9975	-59.9975	-59.9975
5.365	-59.9975	-59.9975	-59.9975
5.37	-59.9975	-59.9975	-59.9975
5.375	-59.9975	-59.9975	-59.9975
5.38	-59.9975	-59.9975	-59.9975
5.385	-59.9975	-59.9975	-59.9975
5.39	-59.9975	-59.9975	-59.9975
5.395	-59.9975	-59.9975	-59.9975
5.4	-59.9975	-59.9975	-59.9975
5.405	-59.9975	-59.9975	-59.9975
5.41	-59.9975	-59.9975	-59.9975
5.415	-59.9975	-59.9975	-59.9975
5.42	-59.9975	-59.9975	-59.9975
5.425	-59.9975	-59.9975	-59.9975
5.43	-59.9975	-59.9975	-59.9975
5.435	-59.9975	-59.9975	-59.9975
5.44	-59.9975	-59.9975	-59.9975
5.445	-59.9975	-59.9975	-59.9975
5.45	-59.9975	-59.9975	-59.9975
5.455	-59.9975	-59.9975	-59.9975
5.46	-59.9975	-59.9975	-59.9975
5.465	-59.9975	-59.9975	-59.9975
5.47	-59.9975	-59.9975	-59.9975
5.475	-59.9975	-59.9975	-59.9975
5.48	-59.9975	-59.9975	-59.9975
5.485	-59.9975	-59.9975	-59.9975
5.49	-59.9975	-59.9975	-59.9975
5.495	-59.9975	-59.9975	-59.9975
5.5	-59.9975	-59.9975	-59.9975
5.505	-59.9975	-59.9975	-59.9975
5.51	-59.9975	-59.9975	-59.9975
5.515	-59.9975	-59.9975	-59.9975
5.52	-59.9975	-59.9975	-59.9975
5.525	-59.9975	-59.9975	-59.9975
5.53	-59.9975	-59.9975	-59.9975
5.535	-59.9975	-59.9975	-59.9975
5.54	-59.9975	-59.9975	-59.9975
5.545	-59.9975	-59.9975	-59.9975
5.55	-59.9975	-59.9975	-59.9975
5.555	-59.9975	-59.9975	-59.9975
5.56	-59.9975	-59.9975	-59.9975
5.565	-59.9975	-59.9975	-59.9975
5.57	-59.9975	-59.9975	-59.9975
5.575	-59.9975	-59.9975	-59.9975
5.58	-59.9975	-59.9975	-59.9975
5.585	-59.9975	-59.9975	-59.9975
5.59	-59.9975	-59.9975	-59.9975
5.595	-59.9975	-59.9975	-59.9975
5.6	-59.9975	-59.9975	-59.9975
5.605	-59.9975	-59.9975	-59.9975
5.61	-59.9975	-59.9975	-59.9975
5.615	-59.9975	-59.9975	-59.9975
5.62	-59.9975	-59.9975	-59.9975
5.625	-59.9975	-59.9975	-59.9975
5.63	-59.9975	-59.9975	-59.9975
5.635	-59.9975	-59.9975	-59.9975
5.64	-59.9975	-59.9975	-59.9975
5.645	-59.9975	-59.9975	-59.9975
5.65	-59.9975	-59.9975	-59.9975
5.655	-59.9975	-59.9975	-59.9975
5.66	-59.9975	-59.9975	-59.9975
5.665	-59.9975	-59.9975	-59.9975
5.67	-59.9975	-59.9975	-59.9975
5.675	-59.9975	-59.9975	-59.9975
5.68	-59.9975	-59.9975	-59.9975
5.685	-59.9975	-59.9975	-59.9975
5.69	-59.9975	-59.9975	-59.9975
5.695	-59.9975	-59.9975	-59.9975
5.7	-59.9975	-59.9975	-59.9975
5.705	-59.9975	-59.9975	-59.9975
5.71	-59.9975	-59.9975	-59.9975
5.715	-59.9975	-59.9975	-59.9975
5.72	-59.9975	-59.9975	-59.9975
5.725	-59.9975	-59.9975	-59.9975
5.73	-59.9975	-59.9975	-59.9975
5.735	-59.9975	-59.9975	-59.9975
5.74	-59.9975	-59.9975	-59.9975
5.745	-59.9975	-59.9975	-59.9975
5.75	-59.9975	-59.9975	-59.9975
5.755	-59.9975	-59.9975	-59.9975
5.76	-59.9975	-59.9975	-59.9975
5.765	-59.9975	-59.9975	-59.9975
5.77	-59.9975	-59.9975	-59.9975
5.775	-59.9975	-59.9975	-59.9975
5.78	-59.9975	-59.9975	-59.9975
5.785	-59.9975	-59.9975	-59.9975
5.79	-59.9975	-59.9975	-59.9975
5.795	-59.9975	-59.9975	-59.9975
5.8	-59.9975	-59.9975	-59.9975
5.805	-59.9975	-59.9975	-59.9975
5.81	-59.9975	-59.9975	-59.9975
5.815	-59.9975	-59.9975	-59.9975
5.82	-59.9975	-59.9975	-59.9975
5.825	-59.9975	-59.9975	-59.9975
5.83	-59.9975	-59.9975	-59.9975
5.835	-59.9975	-59.9975	-59.9975
5.84	-59.9975	-59.9975	-59.9975
5.845	-59.9975	-59.9975	-59.9975
5.85	-59.9975	-59.9975	-59.9975
5.855	-59.9975	-59.9975	-59.9975
5.86	-59.9975	-59.9975	-59.9975
5.865	-59.9975	-59.9975	-59.9975
5.87	-59.9975	-59.9975	-59.9975
5.875	-59.9975	-59.9975	-59.9975
5.88	-59.9975	-59.9975	-59.9975
5.885	-59.9975	-59.9975	-59.9975
5.89	-59.9975	-59.9975	-59.9975
5.895	-59.9975	-59.9975	-59.9975
5.9	-59.9975	-59.9975	-59.9975
5.905	-59.9975	-59.9975	-59.9975
5.91	-59.9975	-59.9975	-59.9975
5.915	-59.9975	-59.9975	-59.9975
5.92	-59.9975	-59.9975	-59.9975
5.925	-59.9975	-59.9975	-59.9975
5.93	-59.9975	-59.9975	-59.9975
5.935	-59.9975	-59.9975	-59.9975
5.94	-59.9975	-59.9975	-59.9975
5.945	-59.9975	-59.9975	-59.9975
5.95	-59.9975	-59.9975	-59.9975
5.955	-59.9975	-59.9975	-59.9975
5.96	-59.9975	-59.9975	-59.9975
5.965	-59.9975	-59.9975	-59.9975
5.97	-59.9975	-59.9975	-59.9975
5.975	-59.9975	-59.9975	-59.9975
5.98	-59.9975	-59.9975	-59.9975
5.985	-59.9975	-59.9975	-59.9975
5.99	-59.9975	-59.9975	-59.9975
5.995	-59.9975	-59.9975	-59.9975
6	-59.9975	-59.9975	-59.9975
6.005	-59.9975	-59.9975	-59.9975
6.01	-59.9975	-59.9975	-59.9975
6.015	-59.9975	-59.9975	-59.9975
6.02	-59.9975	-59.9975	-59.9975
6.025	-59.9975	-59.9975	-59.9975
6.03	-59.9975	-59.9975	-59.9975
6.035	-59.9975	-59.9975	-59.9975
6.04	-59.9975	-59.9975	-59.9975
6.045	-59.9975	-59.9975	-59.9975
6.05	-59.9975	-59.9975	-59.9975
6.055	-59.9975	-59.9975	-59.9975
6.06	-59.9975	-59.9975	-59.9975
6.065	-59.9975	-59.9975	-59.9975
6.07	-59.9975	-59.9975	-59.9975
6.075	-59.9975	-59.9975	-59.9975
6.08	-59.9975	-59.9975	-59.9975
6.085	-59.9975	-59.9975	-59.9975
6.09	-59.9975	-59.9975	-59.9975
6.095	-59.9975	-59.9975	-59.9975
6.1	-59.9975	-59.9975	-59.9975
6.105	-59.9975	-59.9975	-59.9975
6.11	-59.9975	-59.9975	-59.9975
6.115	-59.9975	-59.9975	-59.9975
6.12	-59.9975	-59.9975	-59.9975
6.125	-59.9975	-59.9975	-59.9975
6.13	-59.9975	-59.9975	-59.9975
6.135	-59.9975	-59.9975	-59.9975
6.14	-59.9975	-59.9975	-59.9975
6.145	-59.9975	-59.9975	-59.9975
6.15	-59.9975	-59.9975	-59.9975
6.155	-59.9975	-59.9975	-59.9975
6.16	-59.9975	-59.9975	-59.9975
6.165	-59.9975	-59.9975	-59.9975
6.17	-59.9975	-59.9975	-59.9975
6.175	-59.9975	-59.9975	-59.9975
6.18	-59.9975	-59.9975	-59.9975
6.185	-59.9975	-59.9975	-59.9975
6.19	-59.9975	-59.9975	-59.9975
6.195	-59.9975	-59.9975	-59.9975
6.2	-59.9975	-59.9975	-59.9975
6.205	-59.9975	-59.9975	-59.9975
6.21	-59.9975	-59.9975	-59.9975
6.215	-59.9975	-59.9975	-59.9975
6.22	-59.9975	-59.9975	-59.9975
6.225	-59.9975	-59.9975	-59.9975
6.23	-59.9975	-59.9975	-59.9975
6.235	-59.9975	-59.9975	-59.9975
6.24	-59.9975	-59.9975	-59.9975
6.245	-59.9975	-59.9975	-59.9975
6.25	-59.9975	-59.9975	-59.9975
6.255	-59.9975	-59.9975	-59.9975
6.26	-59.9975	-59.9975	-59.9975
6.265	-59.9975	-59.9975	-59.9975
6.27	-59.9975	-59.9975	-59.9975
6.275	-59.9975	-59.9975	-59.9975
6.28	-59.9975	-59.9975	-59.9975
6.285	-59.9975	-59.9975	-59.9975
6.29	-59.9975	-59.9975	-59.9975
6.295	-59.9975	-59.9975	-59.9975
6.3	-59.9975	-59.9975	-59.9975
6.305	-59.9975	-59.9975	-59.9975
6.31	-59.9975	-59.9975	-59.9975
6.315	-59.9975	-59.9975	-59.9975
6.32	-59.9975	-59.9975	-59.9975
6.325	-59.9975	-59.9975	-59.9975
6.33	-59.9975	-59.9975	-59.9975
6.335	-59.9975	-59.9975	-59.9975
6.34	-59.9975	-59.9975	-59.9975
6.345	-59.9975	-59.9975	-59.9975
6.35	-59.9975	-59.9975	-59.9975
6.355	-59.9975	-59.9975	-59.9975
6.36	-59.9975	-59.9975	-59.9975
6.365	-59.9975	-59.9975	-59.9975
6.37	-59.9975	-59.9975	-59.9975
6.375	-59.9975	-59.9975	-59.9975
6.38	-59.9975	-59.9975	-59.9975
6.385	-59.9975	-59.9975	-59.9975
6.39	-59.9975	-59.9975	-59.9975
6.395	-59.9975	-59.9975	-59.9975
6.4	-59.9975	-59.9975	-59.9975
6.405	-59.9975	-59.9975	-59.9975
6.41	-59.9975	-59.9975	-59.9975
6.415	-59.9975	-59.9975	-59.9975
6.42	-59.9975	-59.9975	-59.9975
6.425	-59.9975	-59.9975	-59.9975
6.43	-59.9975	-59.9975	-59.9975
6.435	-59.9975	-59.9975	-59.9975
6.44	-59.9975	-59.9975	-59.9975
6.445	-59.9975	-59.9975	-59.9975
6.45	-59.9975	-59.9975	-59.9975
6.455	-59.9975	-59.9975	-59.9975
6.46	-59.9975	-59.9975	-59.9975
6.465	-59.9975	-59.9975	-59.9975
6.47	-59.9975	-59.9975	-59.9975
6.475	-59.9975	-59.9975	-59.9975
6.48	-59.9975	-59.9975	-59.9975
6.485	-59.9975	-59.9975	-59.9975
6.49	-59.9975	-59.9975	-59.9975
6.495	-59.9975	-59.9975	-59.9975
6.5	-59.9975	-59.9975	-59.9975
6.505	-59.9975	-59.9975	-59.9975
6.51	-59.9975	-59.9975	-59.9975
6.515	-59.9975	-59.9975	-59.9975
6.52	-59.9975	-59.9975	-59.9975
6.525	-59.9975	-59.9975	-59.9975
6.53	-59.9975	-59.9975	-59.9975
6.535	-59.9975	-59.9975	-59.9975
6.54	-59.9975	-59.9975	-59.9975
6.545	-59.9975	-59.9975	-59.9975
6.55	-59.9975	-59.9975	-59.9975
6.555	-59.9975	-59.9975	-59.9975
6.56	-59.9975	-59.9975	-59.9975
6.565	-59.9975	-59.9975	-59.9975
6.57	-59.9975	-59.9975	-59.9975
6.575	-59.9975	-59.9975	-59.9975
6.58	-59.9975	-59.9975	-59.9975
6.585	-59.9975	-59.9975	-59.9975
6.59	-59.9975	-59.9975	-59.9975
6.595	-59.9975	-59.9975	-59.9975
6.6	-59.9975	-59.9975	-59.9975
6.605	-59.9975	-59.9975	-59.9975
6.61	-59.9975	-59.9975	-59.9975
6.615	-59.9975	-59.9975	-59.9975
6.62	-59.9975	-59.9975	-59.9975
6.625	-59.9975	-59.9975	-59.9975
6.63	-59.9975	-59.9975	-59.9975
6.635	-59.9975	-59.9975	-59.9975
6.64	-59.9975	-59.9975	-59.9975
6.645	-59.9975	-59.9975	-59.9975
6.65	-59.9975	-59.9975	-59.9975
6.655	-59.9975	-59.9975	-59.9975
6.66	-59.9975	-59.9975	-59.9975
6.665	-59.9975	-59.9975	-59.9975
6.67	-59.9975	-59.9975	-59.9975
6.675	-59.9975	-59.9975	-59.9975
6.68	-59.9975	-59.9975	-59.9975
6.685	-59.9975	-59.9975	-59.9975
6.69	-59.9975	-59.9975	-59.9975
6.695	-59.9975	-59.9975	-59.9975
6.7	-59.9975	-59.9975	-59.9975
6.705	-59.9975	-59.9975	-59.9975
6.71	-59.9975	-59.9975	-59.9975
6.715	-59.9975	-59.9975	-59.9975
6.72	-59.9975	-59.9975	-59.9975
6.725	-59.9975	-59.9975	-59.9975
6.73	-59.9975	-59.9975	-59.9975
6.735	-59.9975	-59.9975	-59.9975
6.74	-59.9975	-59.9975	-59.9975
6.745	-59.9975	-59.9975	-59.9975
6.75	-59.9975	-59.9975	-59.9975
6.755	-59.9975	-59.9975	-59.9975
6.76	-59.9975	-59.9975	-59.9975
6.765	-59.9975	-59.9975	-59.9975
6.77	-59.9975	-59.9975	-59.9975
6.775	-59.9975	-59.9975	-59.9975
6.78	-59.9975	-59.9975	-59.9975
6.785	-59.9975	-59.9975	-59.9975
6.79	-59.9975	-59.9975	-59.9975
6.795	-59.9975	-59.9975	-59.9975
6.8	-59.9975	-59.9975	-59.9975
6.805	-59.9975	-59.9975	-59.9975
6.81	-59.9975	-59.9975	-59.9975
6.815	-59.9975	-59.9975	-59.9975
6.82	-59.9975	-59.9975	-59.9975
6.825	-59.9975	-59.9975	-59.9975
6.83	-59.9975	-59.9975	-59.9975
6.835	-59.9975	-59.9975	-59.9975
6.84	-59.9975	-59.9975	-59.9975
6.845	-59.9975	-59.9975	-59.9975
6.85	-59.9975	-59.9975	-59.9975
6.855	-59.9975	-59.9975	-59.9975
6.86	-59.9975	-59.9975	-59.9975
6.865	-59.9975	-59.9975	-59.9975
6.87	-59.9975	-59.9975	-59.9975
6.875	-59.9975	-59.9975	-59.9975
6.88	-59.9975	-59.9975	-59.9975
6.885	-59.9975	-59.9975	-59.9975
6.89	-59.9975	-59.9975	-59.9975
6.895	-59.9975	-59.9975	-59.9975
6.9	-59.9975	-59.9975	-59.9975
6.905	-59.9975	-59.9975	-59.9975
6.91	-59.9975	-59.9975	-59.9975
6.915	-59.9975	-59.9975	-59.9975
6.92	-59.9975	-59.9975	-59.9975
6.925	-59.9975	-59.9975	-59.9975
6.93	-59.9975	-59.9975	-59.9975
6.935	-59.9975	-59.9975	-59.9975
6.94	-59.9975	-59.9975	-59.9975
6.945	-59.9975	-59.9975	-59.9975
6.95	-59.9975	-59.9975	-59.9975
6.955	-59.9975	-59.9975	-59.9975
6.96	-59.9975	-59.9975	-59.9975
6.965	-59.9975	-59.9975	-59.9975
6.97	-59.9975	-59.9975	-59.9975
6.975	-59.9975	-59.9975	-59.9975
6.98	-59.9975	-59.9975	-59.9975
6.985	-59.9975	-59.9975	-59.9975
6.99	-59.9975	-59.9975	-59.9975
6.995	-59.9975	-59.9975	-59.9975
7	-59.9975	-59.9975	-59.9975
7.005	-59.9975	-59.9975	-59.9975
7.01	-59.9975	-59.9975	-59.9975
7.015	-59.9975	-59.9975	-59.9975
7.02	-59.9975	-59.9975	-59.9975
7.025	-59.9975	-59.9975	-59.9975
7.03	-59.9975	-59.9975	-59.9975
7.035	-59.9975	-59.9975	-59.9975
7.04	-59.9975	-59.9975	-59.9975
7.045	-59.9975	-59.9975	-59.9975
7.05	-59.9975	-59.9975	-59.9975
7.055	-59.9975	-59.9975	-59.9975
7.06	-59.9975	-59.9975	-59.9975
7.065	-59.9975	-59.9975	-59.9975
7.07	-59.9975	-59.9975	-59.9975
7.075	-59.9975	-59.9975	-59.9975
7.08	-59.9975	-59.9975	-59.9975
7.085	-59.9975	-59.9975	-59.9975
7.09	-59.9975	-59.9975	-59.9975
7.095	-59.9975	-59.9975	-59.9975
7.1	-59.9975	-59.9975	-59.9975
7.105	-59.9975	-59.9975	-59.9975
7.11	-59.9975	-59.9975	-59.9975
7.115	-59.9975	-59.9975	-59.9975
7.12	-59.9975	-59.9975	-59.9975
7.125	-59.9975	-59.9975	-59.9975
7.13	-59.9975	-59.9975	-59.9975
7.135	-59.9975	-59.9975	-59.9975
7.14	-59.9975	-59.9975	-59.9975
7.145	-59.9975	-59.9975	-59.9975
7.15	-59.9975	-59.9975	-59.9975
7.155	-59.9975	-59.9975	-59.9975
7.16	-59.9975	-59.9975	-59.9975
7.165	-59.9975	-59.9975	-59.9975
7.17	-59.9975	-59.9975	-59.9975
7.175	-59.9975	-59.9975	-59.9975
7.18	-59.9975	-59.9975	-59.9975
7.185	-59.9975	-59.9975	-59.9975
7.19	-59.9975	-59.9975	-59.9975
7.195	-59.9975	-59.9975	-59.9975
7.2	-59.9975	-59.9975	-59.9975
7.205	-59.9975	-59.9975	-59.9975
7.21	-59.9975	-59.9975	-59.9975
7.215	-59.9975	-59.9975	-59.9975
7.22	-59.9975	-59.9975	-59.9975
7.225	-59.9975	-59.9975	-59.9975
7.23	-59.9975	-59.9975	-59.9975
7.235	-59.9975	-59.9975	-59.9975
7.24	-59.9975	-59.9975	-59.9975
7.245	-59.9975	-59.9975	-59.9975
7.25	-59.9975	-59.9975	-59.9975
7.255	-59.9975	-59.9975	-59.9975
7.26	-59.9975	-59.9975	-59.9975
7.265	-59.9975	-59.9975	-59.9975
7.27	-59.9975	-59.9975	-59.9975
7.275	-59.9975	-59.9975	-59.9975
7.28	-59.9975	-59.9975	-59.9975
7.285	-59.9975	-59.9975	-59.9975
7.29	-59.9975	-59.9975	-59.9975
7.295	-59.9975	-59.9975	-59.9975
7.3	-59.9975	-59.9975	-59.9975
7.305	-59.9975	-59.9975	-59.9975
7.31	-59.9975	-59.9975	-59.9975
7.315	-59.9975	-59.9975	-59.9975
7.32	-59.9975	-59.9975	-59.9975
7.325	-59.9975	-59.9975	-59.9975
7.33	-59.9975	-59.9975	-59.9975
7.335	-59.9975	-59.9975	-59.9975
7.34	-59.9975	-59.9975	-59.9975
7.345	-59.9975	-59.9975	-59.9975
7.35	-59.9975	-59.9975	-59.9975
7.355	-59.9975	-59.9975	-59.9975
7.36	-59.9975	-59.9975	-59.9975
7.365	-59.9975	-59.9975	-59.9975
7.37	-59.9975	-59.9975	-59.9975
7.375	-59.9975	-59.9975	-59.9975
7.38	-59.9975	-59.9975	-59.9975
7.385	-59.9975	-59.9975	-59.9975
7.39	-59.9975	-59.9975	-59.9975
7.395	-59.9975	-59.9975	-59.9975
7.4	-59.9975	-59.9975	-59.9975
7.405	-59.9975	-59.9975	-59.9975
7.41	-59.9975	-59.9975	-59.9975
7.415	-59.9975	-59.9975	-59.9975
7.42	-59.9975	-59.9975	-59.9975
7.425	-59.9975	-59.9975	-59.9975
7.43	-59.9975	-59.9975	-59.9975
7.435	-59.9975	-59.9975	-59.9975
7.44	-59.9975	-59.9975	-59.9975
7.445	-59.9975	-59.9975	-59.9975
7.45	-59.9975	-59.9975	-59.9975
7.455	-59.9975	-59.9975	-59.9975
7.46	-59.9975	-59.9975	-59.9975
7.465	-59.9975	-59.9975	-59.9975
7.47	-59.9975	-59.9975	-59.9975
7.475	-59.9975	-59.9975	-59.9975
7.48	-59.9975	-59.9975	-59.9975
7.485	-59.9975	-59.9975	-59.9975
7.49	-59.9975	-59.9975	-59.9975
7.495	-59.9975	-59.9975	-59.9975
7.5	-59.9975	-59.9975	-59.9975
7.505	-59.9975	-59.9975	-59.9975
7.51	-59.9975	-59.9975	-59.9975
7.515	-59.9975	-59.9975	-59.9975
7.52	-59.9975	-59.9975	-59.9975
7.525	-59.9975	-59.9975	-59.9975
7.53	-59.9975	-59.9975	-59.9975
7.535	-59.9975	-59.9975	-59.9975
7.54	-59.9975	-59.9975	-59.9975
7.545	-59.9975	-59.9975	-59.9975
7.55	-59.9975	-59.9975	-59.9975
7.555	-59.9975	-59.9975	-59.9975
7.56	-59.9975	-59.9975	-59.9975
7.565	-59.9975	-59.9975	-59.9975
7.57	-59.9975	-59.9975	-59.9975
7.575	-59.9975	-59.9975	-59.9975
7.58	-59.9975	-59.9975	-59.9975
7.585	-59.9975	-59.9975	-59.9975
7.59	-59.9975	-59.9975	-59.9975
7.595	-59.9975	-59.9975	-59.9975
7.6	-59.9975	-59.9975	-59.9975
7.605	-59.9975	-59.9975	-59.9975
7.61	-59.9975	-59.9975	-59.9975
7.615	-59.9975	-59.9975	-59.9975
7.62	-59.9975	-59.9975	-59.9975
7.625	-59.9975	-59.9975	-59.9975
7.63	-59.9975	-59.9975	-59.9975
7.635	-59.9975	-59.9975	-59.9975
7.64	-59.9975	-59.9975	-59.9975
7.645	-59.9975	-59.9975	-59.9975
7.65	-59.9975	-59.9975	-59.9975
7.655	-59.9975	-59.9975	-59.9975
7.66	-59.9975	-59.9975	-59.9975
7.665	-59.9975	-59.9975	-59.9975
7.67	-59.9975	-59.9975	-59.9975
7.675	-59.9975	-59.9975	-59.9975
7.68	-59.9975	-59.9975	-59.9975
7.685	-59.9975	-59.9975	-59.9975
7.69	-59.9975	-59.9975	-59.9975
7.695	-59.9975	-59.9975	-59.9975
7.7	-59.9975	-59.9975	-59.9975
7.705	-59.9975	-59.9975	-59.9975
7.71	-59.9975	-59.9975	-59.9975
7.715	-59.9975	-59.9975	-59.9975
7.72	-59.9975	-59.9975	-59.9975
7.725	-59.9975	-59.9975	-59.9975
7.73	-59.9975	-59.9975	-59.9975
7.735	-59.9975	-59.9975	-59.9975
7.74	-59.9975	-59.9975	-59.9975
7.745	-59.9975	-59.9975	-59.9975
7.75	-59.9975	-59.9975	-59.9975
7.755	-59.9975	-59.9975	-59.9975
7.76	-59.9975	-59.9975	-59.9975
7.765	-59.9975	-59.9975	-59.9975
7.77	-59.9975	-59.9975	-59.9975
7.775	-59.9975	-59.9975	-59.9975
7.78	-59.9975	-59.9975	-59.9975
7.785	-59.9975	-59.9975	-59.9975
7.79	-59.9975	-59.9975	-59.9975
7.795	-59.9975	-59.9975	-59.9975
7.8	-59.9975	-59.9975	-59.9975
7.805	-59.9975	-59.9975	-59.9975
7.81	-59.9975	-59.9975	-59.9975
7.815	-59.9975	-59.9975	-59.9975
7.82	-59.9975	-59.9975	-59.9975
7.825	-59.9975	-59.9975	-59.9975
7.83	-59.9975	-59.9975	-59.9975
7.835	-59.9975	-59.9975	-59.9975
7.84	-59.9975	-59.9975	-59.9975
7.845	-59.9975	-59.9975	-59.9975
7.85	-59.9975	-59.9975	-59.9975
7.855	-59.9975	-59.9975	-59.9975
7.86	-59.9975	-59.9975	-59.9975
7.865	-59.9975	-59.9975	-59.9975
7.87	-59.9975	-59.9975	-59.9975
7.875	-59.9975	-59.9975	-59.9975
7.88	-59.9975	-59.9975	-59.9975
7.885	-59.9975	-59.9975	-59.9975
7.89	-59.9975	-59.9975	-59.9975
7.895	-59.9975	-59.9975	-59.9975
7.9	-59.9975	-59.9975	-59.9975
7.905	-59.9975	-59.9975	-59.9975
7.91	-59.9975	-59.9975	-59.9975
7.915	-59.9975	-59.9975	-59.9975
7.92	-59.9975	-59.9975	-59.9975
7.925	-59.9975	-59.9975	-59.9975
7.93	-59.9975	-59.9975	-59.9975
7.935	-59.9975	-59.9975	-59.9975
7.94	-59.9975	-59.9975	-59.9975
7.945	-59.9975	-59.9975	-59.9975
7.95	-59.9975	-59.9975	-59.9975
7.955	-59.9975	-59.9975	-59.9975
7.96	-59.9975	-59.9975	-59.9975
7.965	-59.9975	-59.9975	-59.9975
7.97	-59.9975	-59.9975	-59.9975
7.975	-59.9975	-59.9975	-59.9975
7.98	-59.9975	-59.9975	-59.9975
7.985	-59.9975	-59.9975	-59.9975
7.99	-59.9975	-59.9975	-59.9975
7.995	-59.9975	-59.9975	-59.9975
8	-59.9975	-59.9975	-59.9975
8.005	-59.9975	-59.9975	-59.9975
8.01	-59.9975	-59.9975	-59.9975
8.015	-59.9975	-59.9975	-59.9975
8.02	-59.9975	-59.9975	-59.9975
8.025	-59.9975	-59.9975	-59.9975
8.03	-59.9975	-59.9975	-59.9975
8.035	-59.9975	-59.9975	-59.9975
8.04	-59.9975	-59.9975	-59.9975
8.045	-59.9975	-59.9975	-59.9975
8.05	-59.9975	-59.9975	-59.9975
8.055	-59.9975	-59.9975	-59.9975
8.06	-59.9975	-59.9975	-59.9975
8.065	-59.9975	-59.9975	-59.9975
8.07	-59.9975	-59.9975	-59.9975
8.075	-59.9975	-59.9975	-59.9975
8.08	-59.9975	-59.9975	-59.9975
8.085	-59.9975	-59.9975	-59.9975
8.09	-59.9975	-59.9975	-59.9975
8.095	-59.9975	-59.9975	-59.9975
8.1	-59.9975	-59.9975	-59.9975
8.105	-59.9975	-59.9975	-59.9975
8.11	-59.9975	-59.9975	-59.9975
8.115	-59.9975	-59.9975	-59.9975
8.12	-59.9975	-59.9975	-59.9975
8.125	-59.9975	-59.9975	-59.9975
8.13	-59.9975	-59.9975	-59.9975
8.135	-59.9975	-59.9975	-59.9975
8.14	-59.9975	-59.9975	-59.9975
8.145	-59.9975	-59.9975	-59.9975
8.15	-59.9975	-59.9975	-59.9975
8.155	-59.9975	-59.9975	-59.9975
8.16	-59.9975	-59.9975	-59.9975
8.165	-59.9975	-59.9975	-59.9975
8.17	-59.9975	-59.9975	-59.9975
8.175	-59.9975	-59.9975	-59.9975
8.18	-59.9975	-59.9975	-59.9975
8.185	-59.9975	-59.9975	-59.9975
8.19	-59.9975	-59.9975	-59.9975
8.195	-59.9975	-59.9975	-59.9975
8.2	-59.9975	-59.9975	-59.9975
8.205	-59.9975	-59.9975	-59.9975
8.21	-59.9975	-59.9975	-59.9975
8.215	-59.9975	-59.9975	-59.9975
8.22	-59.9975	-59.9975	-59.9975
8.225	-59.9975	-59.9975	-59.9975
8.23	-59.9975	-59.9975	-59.9975
8.235	-59.9975	-59.9975	-59.9975
8.24	-59.9975	-59.9975	-59.9975
8.245	-59.9975	-59.9975	-59.9975
8.25	-59.9975	-59.9975	-59.9975
8.255	-59.9975	-59.9975	-59.9975
8.26	-59.9975	-59.9975	-59.9975
8.265	-59.9975	-59.9975	-59.9975
8.27	-59.9975	-59.9975	-59.9975
8.275	-59.9975	-59.9975	-59.9975
8.28	-59.9975	-59.9975	-59.9975
8.285	-59.9975	-59.9975	-59.9975
8.29	-59.9975	-59.9975	-59.9975
8.295	-59.9975	-59.9975	-59.9975
8.3	-59.9975	-59.9975	-59.9975
8.305	-59.9975	-59.9975	-59.9975
8.31	-59.9975	-59.9975	-59.9975
8.315	-59.9975	-59.9975	-59.9975
8.32	-59.9975	-59.9975	-59.9975
8.325	-59.9975	-59.9975	-59.9975
8.33	-59.9975	-59.9975	-59.9975
8.335	-59.9975	-59.9975	-59.9975
8.34	-59.9975	-59.9975	-59.9975
8.345	-59.9975	-59.9975	-59.9975
8.35	-59.9975	-59.9975	-59.9975
8.355	-59.9975	-59.9975	-59.9975
8.36	-59.9975	-59.9975	-59.9975
8.365	-59.9975	-59.9975	-59.9975
8.37	-59.9975	-59.9975	-59.9975
8.375	-59.9975	-59.9975	-59.9975
8.38	-59.9975	-59.9975	-59.9975
8.385	-59.9975	-59.9975	-59.9975
8.39	-59.9975	-59.9975	-59.9975
8.395	-59.9975	-59.9975	-59.9975
8.4	-59.9975	-59.9975	-59.9975
8.405	-59.9975	-59.9975	-59.9975
8.41	-59.9975	-59.9975	-59.9975
8.415	-59.9975	-59.9975	-59.9975
8.42	-59.9975	-59.9975	-59.9975
8.425	-59.9975	-59.9975	-59.9975
8.43	-59.9975	-59.9975	-59.9975
8.435	-59.9975	-59.9975	-59.9975
8.44	-59.9975	-59.9975	-59.9975
8.445	-59.9975	-59.9975	-59.9975
8.45	-59.9975	-59.9975	-59.9975
8.455	-59.9975	-59.9975	-59.9975
8.46	-59.9975	-59.9975	-59.9975
8.465	-59.9975	-59.9975	-59.9975
8.47	-59.9975	-59.9975	-59.9975
8.475	-59.9975	-59.9975	-59.9975
8.48	-59.9975	-59.9975	-59.9975
8.485	-59.9975	-59.9975	-59.9975
8.49	-59.9975	-59.9975	-59.9975
8.495	-59.9975	-59.9975	-59.9975
8.5	-59.9975	-59.9975	-59.9975
8.505	-59.9975	-59.9975	-59.9975
8.51	-59.9975	-59.9975	-59.9975
8.515	-59.9975	-59.9975	-59.9975
8.52	-59.9975	-59.9975	-59.9975
8.525	-59.9975	-59.9975	-59.9975
8.53	-59.9975	-59.9975	-59.9975
8.535	-59.9975	-59.9975	-59.9975
8.54	-59.9975	-59.9975	-59.9975
8.545	-59.9975	-59.9975	-59.9975
8.55	-59.9975	-59.9975	-59.9975
8.555	-59.9975	-59.9975	-59.9975
8.56	-59.9975	-59.9975	-59.9975
8.565	-59.9975	-59.9975	-59.9975
8.57	-59.9975	-59.9975	-59.9975
8.575	-59.9975	-59.9975	-59.9975
8.58	-59.9975	-59.9975	-59.9975
8.585	-59.9975	-59.9975	-59.9975
8.59	-59.9975	-59.9975	-59.9975
8.595	-59.9975	-59.9975	-59.9975
8.6	-59.9975	-59.9975	-59.9975
8.605	-59.9975	-59.9975	-59.9975
8.61	-59.9975	-59.9975	-59.9975
8.615	-59.9975	-59.9975	-59.9975
8.62	-59.9975	-59.9975	-59.9975
8.625	-59.9975	-59.9975	-59.9975
8.63	-59.9975	-59.9975	-59.9975
8.635	-59.9975	-59.9975	-59.9975
8.64	-59.9975	-59.9975	-59.9975
8.645	-59.9975	-59.9975	-59.9975
8.65	-59.9975	-59.9975	-59.9975
8.655	-59.9975	-59.9975	-59.9975
8.66	-59.9975	-59.9975	-59.9975
8.665	-59.9975	-59.9975	-59.9975
8.67	-59.9975	-59.9975	-59.9975
8.675	-59.9975	-59.9975	-59.9975
8.68	-59.9975	-59.9975	-59.9975
8.685	-59.9975	-59.9975	-59.9975
8.69	-59.9975	-59.9975	-59.9975
8.695	-59.9975	-59.9975	-59.9975
8.7	-59.9975	-59.9975	-59.9975
8.705	-59.9975	-59.9975	-59.9975
8.71	-59.9975	-59.9975	-59.9975
8.715	-59.9975	-59.9975	-59.9975
8.72	-59.9975	-59.9975	-59.9975
8.725	-59.9975	-59.9975	-59.9975
8.73	-59.9975	-59.9975	-59.9975
8.735	-59.9975	-59.9975	-59.9975
8.74	-59.9975	-59.9975	-59.9975
8.745	-59.9975	-59.9975	-59.9975
8.75	-59.9975	-59.9975	-59.9975
8.755	-59.9975	-59.9975	-59.9975
8.76	-59.9975	-59.9975	-59.9975
8.765	-59.9975	-59.9975	-59.9975
8.77	-59.9975	-59.9975	-59.9975
8.775	-59.9975	-59.9975	-59.9975
8.78	-59.9975	-59.9975	-59.9975
8.785	-59.9975	-59.9975	-59.9975
8.79	-59.9975	-59.9975	-59.9975
8.795	-59.9975	-59.9975	-59.9975
8.8	-59.9975	-59.9975	-59.9975
8.805	-59.9975	-59.9975	-59.9975
8.81	-59.9975	-59.9975	-59.9975
8.815	-59.9975	-59.9975	-59.9975
8.82	-59.9975	-59.9975	-59.9975
8.825	-59.9975	-59.9975	-59.9975
8.83	-59.9975	-59.9975	-59.9975
8.835	-59.9975	-59.9975	-59.9975
8.84	-59.9975	-59.9975	-59.9975
8.845	-59.9975	-59.9975	-59.9975
8.85	-59.9975	-59.9975	-59.9975
8.855	-59.9975	-59.9975	-59.9975
8.86	-59.9975	-59.9975	-59.9975
8.865	-59.9975	-59.9975	-59.9975
8.87	-59.9975	-59.9975	-59.9975
8.875	-59.9975	-59.9975	-59.9975
8.88	-59.9975	-59.9975	-59.9975
8.885	-59.9975	-59.9975	-59.9975
8.89	-59.9975	-59.9975	-59.9975
8.895	-59.9975	-59.9975	-59.9975
8.9	-59.9975	-59.9975	-59.9975
8.905	-59.9975	-59.9975	-59.9975
8.91	-59.9975	-59.9975	-59.9975
8.915	-59.9975	-59.9975	-59.9975
8.92	-59.9975	-59.9975	-59.9975
8.925	-59.9975	-59.9975	-59.9975
8.93	-59.9975	-59.9975	-59.9975
8.935	-59.9975	-59.9975	-59.9975
8.94	-59.9975	-59.9975	-59.9975
8.945	-59.9975	-59.9975	-59.9975
8.95	-59.9975	-59.9975	-59.9975
8.955	-59.9975	-59.9975	-59.9975
8.96	-59.9975	-59.9975	-59.9975
8.965	-59.9975	-59.9975	-59.9975
8.97	-59.9975	-59.9975	-59.9975
8.975	-59.9975	-59.9975	-59.9975
8.98	-59.9975	-59.9975	-59.9975
8.985	-59.9975	-59.9975	-59.9975
8.99	-59.9975	-59.9975	-59.9975
8.995	-59.9975	-59.9975	-59.9975
9	-59.9975	-59.9975	-59.9975
9.005	-59.9975	-59.9975	-59.9975
9.01	-59.9975	-59.9975	-59.9975
9.015	-59.9975	-59.9975	-59.9975
9.02	-59.9975	-59.9975	-59.9975
9.025	-59.9975	-59.9975	-59.9975
9.03	-59.9975	-59.9975	-59.9975
9.035	-59.9975	-59.9975	-59.9975
9.04	-59.9975	-59.9975	-59.9975
9.045	-59.9975	-59.9975	-59.9975
9.05	-59.9975	-59.9975	-59.9975
9.055	-59.9975	-59.9975	-59.9975
9.06	-59.9975	-59.9975	-59.9975
9.065	-59.9975	-59.9975	-59.9975
9.07	-59.9975	-59.9975	-59.9975
9.075	-59.9975	-59.9975	-59.9975
9.08	-59.9975	-59.9975	-59.9975
9.085	-59.9975	-59.9975	-59.9975
9.09	-59.9975	-59.9975	-59.9975
9.095	-59.9975	-59.9975	-59.9975
9.1	-59.9975	-59.9975	-59.9975
9.105	-59.9975	-59.9975	-59.9975
9.11	-59.9975	-59.9975	-59.9975
9.115	-59.9975	-59.9975	-59.9975
9.12	-59.9975	-59.9975	-59.9975
9.125	-59.9975	-59.9975	-59.9975
9.13	-59.9975	-59.9975	-59.9975
9.135	-59.9975	-59.9975	-59.9975
9.14	-59.9975	-59.9975	-59.9975
9.145	-59.9975	-59.9975	-59.9975
9.15	-59.9975	-59.9975	-59.9975
9.155	-59.9975	-59.9975	-59.9975
9.16	-59.9975	-59.9975	-59.9975
9.165	-59.9975	-59.9975	-59.9975
9.17	-59.9975	-59.9975	-59.9975
9.175	-59.9975	-59.9975	-59.9975
9.18	-59.9975	-59.9975	-59.9975
9.185	-59.9975	-59.9975	-59.9975
9.19	-59.9975	-59.9975	-59.9975
9.195	-59.9975	-59.9975	-59.9975
9.2	-59.9975	-59.9975	-59.9975
9.205	-59.9975	-59.9975	-59.9975
9.21	-59.9975	-59.9975	-59.9975
9.215	-59.9975	-59.9975	-59.9975
9.22	-59.9975	-59.9975	-59.9975
9.225	-59.9975	-59.9975	-59.9975
9.23	-59.9975	-59.9975	-59.9975
9.235	-59.9975	-59.9975	-59.9975
9.24	-59.9975	-59.9975	-59.9975
9.245	-59.9975	-59.9975	-59.9975
9.25	-59.9975	-59.9975	-59.9975
9.255	-59.9975	-59.9975	-59.9975
9.26	-59.9975	-59.9975	-59.9975
9.265	-59.9975	-59.9975	-59.9975
9.27	-59.9975	-59.9975	-59.9975
9.275	-59.9975	-59.9975	-59.9975
9.28	-59.9975	-59.9975	-59.9975
9.285	-59.9975	-59.9975	-59.9975
9.29	-59.9975	-59.9975	-59.9975
9.295	-59.9975	-59.9975	-59.9975
9.3	-59.9975	-59.9975	-59.9975
9.305	-59.9975	-59.9975	-59.9975
9.31	-59.9975	-59.9975	-59.9975
9.315	-59.9975	-59.9975	-59.9975
9.32	-59.9975	-59.9975	-59.9975
9.325	-59.9975	-59.9975	-59.9975
9.33	-59.9975	-59.9975	-59.9975
9.335	-59.9975	-59.9975	-59.9975
9.34	-59.9975	-59.9975	-59.9975
9.345	-59.9975	-59.9975	-59.9975
9.35	-59.9975	-59.9975	-59.9975
9.355	-59.9975	-59.9975	-59.9975
9.36	-59.9975	-59.9975	-59.9975
9.365	-59.9975	-59.9975	-59.9975
9.37	-59.9975	-59.9975	-59.9975
9.375	-59.9975	-59.9975	-59.9975
9.38	-59.9975	-59.9975	-59.9975
9.385	-59.9975	-59.9975	-59.9975
9.39	-59.9975	-59.9975	-59.9975
9.395	-59.9975	-59.9975	-59.9975
9.4	-59.9975	-59.9975	-59.9975
9.405	-59.9975	-59.9975	-59.9975
9.41	-59.9975	-59.9975	-59.9975
9.415	-59.9975	-59.9975	-59.9975
9.42	-59.9975	-59.9975	-59.9975
9.425	-59.9975	-59.9975	-59.9975
9.43	-59.9975	-59.9975	-59.9975
9.435	-59.9975	-59.9975	-59.9975
9.44	-59.9975	-59.9975	-59.9975
9.445	-59.9975	-59.9975	-59.9975
9.45	-59.9975	-59.9975	-59.9975
9.455	-59.9975	-59.9975	-59.9975
9.46	-59.9975	-59.9975	-59.9975
9.465	-59.9975	-59.9975	-59.9975
9.47	-59.9975	-59.9975	-59.9975
9.475	-59.9975	-59.9975	-59.9975
9.48	-59.9975	-59.9975	-59.9975
9.485	-59.9975	-59.9975	-59.9975
9.49	-59.9975	-59.9975	-59.9975
9.495	-59.9975	-59.9975	-59.9975
9.5	-59.9975	-59.9975	-59.9975
9.505	-59.9975	-59.9975	-59.9975
9.51	-59.9975	-59.9975	-59.9975
9.515	-59.9975	-59.9975	-59.9975
9.52	-59.9975	-59.9975	-59.9975
9.525	-59.9975	-59.9975	-59.9975
9.53	-59.9975	-59.9975	-59.9975
9.535	-59.9975	-59.9975	-59.9975
9.54	-59.9975	-59.9975	-59.9975
9.545	-59.9975	-59.9975	-59.9975
9.55	-59.9975	-59.9975	-59.9975
9.555	-59.9975	-59.9975	-59.9975
9.56	-59.9975	-59.9975	-59.9975
9.565	-59.9975	-59.9975	-59.9975
9.57	-59.9975	-59.9975	-59.9975
9.575	-59.9975	-59.9975	-59.9975
9.58	-59.9975	-59.9975	-59.9975
9.585	-59.9975	-59.9975	-59.9975
9.59	-59.9975	-59.9975	-59.9975
9.595	-59.9975	-59.9975	-59.9975
9.6	-59.9975	-59.9975	-59.9975
9.605	-59.9975	-59.9975	-59.9975
9.61	-59.9975	-59.9975	-59.9975
9.615	-59.9975	-59.9975	-59.9975
9.62	-59.9975	-59.9975	-59.9975
9.625	-59.9975	-59.9975	-59.9975
9.63	-59.9975	-59.9975	-59.9975
9.635	-59.9975	-59.9975	-59.9975
9.64	-59.9975	-59.9975	-59.9975
9.645	-59.9975	-59.9975	-59.9975
9.65	-59.9975	-59.9975	-59.9975
9.655	-59.9975	-59.9975	-59.9975
9.66	-59.9975	-59.9975	-59.9975
9.665	-59.9975	-59.9975	-59.9975
9.67	-59.9975	-59.9975	-59.9975
9.675	-59.9975	-59.9975	-59.9975
9.68	-59.9975	-59.9975	-59.9975
9.685	-59.9975	-59.9975	-59.9975
9.69	-59.9975	-59.9975	-59.9975
9.695	-59.9975	-59.9975	-59.9975
9.7	-59.9975	-59.9975	-59.9975
9.705	-59.9975	-59.9975	-59.9975
9.71	-59.9975	-59.9975	-59.9975
9.715	-59.9975	-59.9975	-59.9975
9.72	-59.9975	-59.9975	-59.9975
9.725	-59.9975	-59.9975	-59.9975
9.73	-59.9975	-59.9975	-59.9975
9.735	-59.9975	-59.9975	-59.9975
9.74	-59.9975	-59.9975	-59.9975
9.745	-59.9975	-59.9975	-59.9975
9.75	-59.9975	-59.9975	-59.9975
9.755	-59.9975	-59.9975	-59.9975
9.76	-59.9975	-59.9975	-59.9975
9.765	-59.9975	-59.9975	-59.9975
9.77	-59.9975	-59.9975	-59.9975
9.775	-59.9975	-59.9975	-59.9975
9.78	-59.9975	-59.9975	-59.9975
9.785	-59.9975	-59.9975	-59.9975
9.79	-59.9975	-59.9975	-59.9975
9.795	-59.9975	-59.9975	-59.9975
9.8	-59.9975	-59.9975	-59.9975
9.805	-59.9975	-59.9975	-59.9975
9.81	-59.9975	-59.9975	-59.9975
9.815	-59.9975	-59.9975	-59.9975
9.82	-59.9975	-59.9975	-59.9975
9.825	-59.9975	-59.9975	-59.9975
9.83	-59.9975	-59.9975	-59.9975
9.835	-59.9975	-59.9975	-59.9975
9.84	-59.9975	-59.9975	-59.9975
9.845	-59.9975	-59.9975	-59.9975
9.85	-59.9975	-59.9975	-59.9975
9.855	-59.9975	-59.9975	-59.9975
9.86	-59.9975	-59.9975	-59.9975
9.865	-59.9975	-59.9975	-59.9975
9.87	-59.9975	-59.9975	-59.9975
9.875	-59.9975	-59.9975	-59.9975
9.88	-59.9975	-59.9975	-59.9975
9.885	-59.9975	-59.9975	-59.9975
9.89	-59.9975	-59.9975	-59.9975
9.895	-59.9975	-59.9975	-59.9975
9.9	-59.9975	-59.9975	-59.9975
9.905	-59.9975	-59.9975	-59.9975
9.91	-59.9975	-59.9975	-59.9975
9.915	-59.9975	-59.9975	-59.9975
9.92	-59.9975	-59.9975	-59.9975
9.925	-59.9975	-59.9975	-59.9975
9.93	-59.9975	-59.9975	-59.9975
9.935	-59.9975	-59.9975	-59.9975
[truncated: 13 more rows]

## Sheet: Data_Fig13E
	blue	magenta
t-plateau	squares	circles
1000	7.6085	4.4895
900	6.92	3.956
800	6.1875	3.412
700	5.4045	2.8625
600	4.567	2.315
500	3.6745	1.7835
400	2.746	1.289
300	1.8615	0.864
200	1.1695	0.5415
