# Supplementary material for: Vicia faba SV channel VfTPC1 is a hyperexcitable variant of plant vacuole Two Pore Channels
Source: eLife. 2023 Nov 22;12:e86384. doi: 10.7554/eLife.86384 (PMC10665017; doi:10.7554/eLife.86384)
Supplement: Table 1—source data 1. [file elife-86384-table1-data1.xlsx]

## Sheet: Hek293 cell
Table 1 - Source data 1		Vrev = reversal potential in mV
											PK/PNa
	transfection date/ patched HEK cell	Vrev in NaCl	Vrev in KCl	Vrev in CaCl2	Difference Vrev-KCl minus Vrev-NaCl	Difference Vrev-CaCl2 minus Vrev-NaCl	PK/PNa	PCa/PNa				ANOVA
AtTPC1- wildtype	date 1 / cell 1	4.2	-6.6	--	-10.8	--	0.65386	--				PK/PNa
	date 2 / cell 2	-0.3	-9.1	--	-8.8	--	0.707382	--					Sum of Squares	df	Mean Square	F
	date 2 / cell 3	2.5	-4.2	--	-6.7	--	0.768302	--				Between Groups	0.451242	3	0.150414	11.8545
	date 3 / cell 4	2.7	-0.8	--	-3.5	--	0.871372	--				Within Groups	0.203013	16	0.0126883
	date 3 / cell 1	0.9	-6.5	--	-7.4	--	0.747434	--				Total	0.654255	19
mean							0.75	--
SD							0.08	--
AtTPC1D240A/D454A/E528A	date 4 / cell 1	5.5	-0.7	--	-6.2	--	0.783564					Multiple Comparisons
	date 5 / cell 1	4.1	0.9	2.8	-3.2	-1.3	0.881716	5.02732				PK/PNa Dunnett t (2-sided)
	date 5 / cell 2	0.9	-0.5	3.6	-1.4	2.7	0.946414	5.98328				PK/PNa	PK/PNa	Mean Difference	Std. Error	Sig.	95% Confidence Interval
	date 5 / cell 3	3.8	-4.3	4.9	-8.1	1.1	0.727132	5.7761									Lower Bound	Upper Bound
	date 6 / cell 1	5.2	2.6	4.1	-2.6	-1.1	0.902775	5.20728				AtTPC1	VfTPC1	-0.43	0.0755629	9.23504e-05	-0.624395	-0.235605
mean							0.85	5.5				D240A/D454A/E528A	VfTPC1	-0.332	0.0755629	0.00121911	-0.526395	-0.137605
SD							0.09	0.45				E605A/D606A	VfTPC1	-0.326667	0.0727104	0.000995575	-0.513723	-0.13961
AtTPC1E605A/D606A	date 7 / cell 1	1.8	4.5	--	2.7	--	1.11206	--				*. The mean difference is significant at the 0.05 level.
	date 8 / cell 1	5.1	0.6	3.2	-4.5	-1.9	0.837758	4.95113
	date 1 / cell 1	0.9	-3.2	4.2	-4.1	3.3	0.851045	6.20452			PCa/PNa
	date 1 / cell 2	0.3	-2.9	2.7	-3.2	2.4	0.881716	5.80297
	date 2 / cell 1	3.8	-3.5	--	-7.3	--	0.75038	--				ANOVA
	date 2 / cell 2	3.2	-6.1	1.3	-9.3	-1.9	0.693604	4.76163				PCa/PNa
mean							0.85	5.43					Sum of Squares	df	Mean Square	F
SD							0.14	0.69				Between Groups	0.571717	2	0.285858	0.912589
												Within Groups	2.81915	9	0.313239
VfPC1- wildtype	date 9 / cell 1	5.2	9.5	--	4.3	--	1.18431	--				Total	3.39087	11
	date 5 / cell 1	3.7	4.5	--	0.8	--	1.03197	--
	date 10 / cell 1	1	5.6	5.2	4.6	4.2	1.19837	6.56771
	date 10 / cell 2	3.8	--	3.5	--	-0.3	--	5.30605				Multiple Comparisons
	date 10 / cell 3	0.5	7.3	3.2	6.8	2.7	1.3067	5.93327				PCa/PNa Dunnett t (2-sided)
	date 10 / cell 4	1.5	--	3.7	--	2.2	--	5.87912				PCa/PNa	PCa/PNa	Mean Difference	Std. Error	Sig.	95% Confidence Interval
mean							1.18	5.92									Lower Bound	Upper Bound
SD							0.11	0.52				D240A/D454A/E528A	VfTPC1	-0.4225	0.395752	0.487285	-1.45698	0.611976
												E605A/D606A	VfTPC1	-0.495	0.395752	0.388272	-1.52948	0.539476

## Sheet: A.thaliana wild type vacuole
Figure 7—figure supplement 1 - source data
	Individual Exp Vrev in NaCl	mean（N=3） Vrev in KCl	Difference Vrev-NaCl minus Vrev-KCl	PK/PNa		see for details legend of Figure 7 - figure supplement 1
	8.8mV	1.5mV	7.3mV	0.74
	6.3mV	1.5mV	4.8mV	0.82
	8.9 mV	1.5mV	7.4mV	0.73
				Mean ± SD (n) 0.77 ± 0.05 (3)
